# Supplementary material
Source: PubMed Central journal article supplement (PMC3457524)
Supplement: MCB.00436-12_zmb999109665so1.pdf [file MCB.00436-12_zmb999109665so1.pdf]

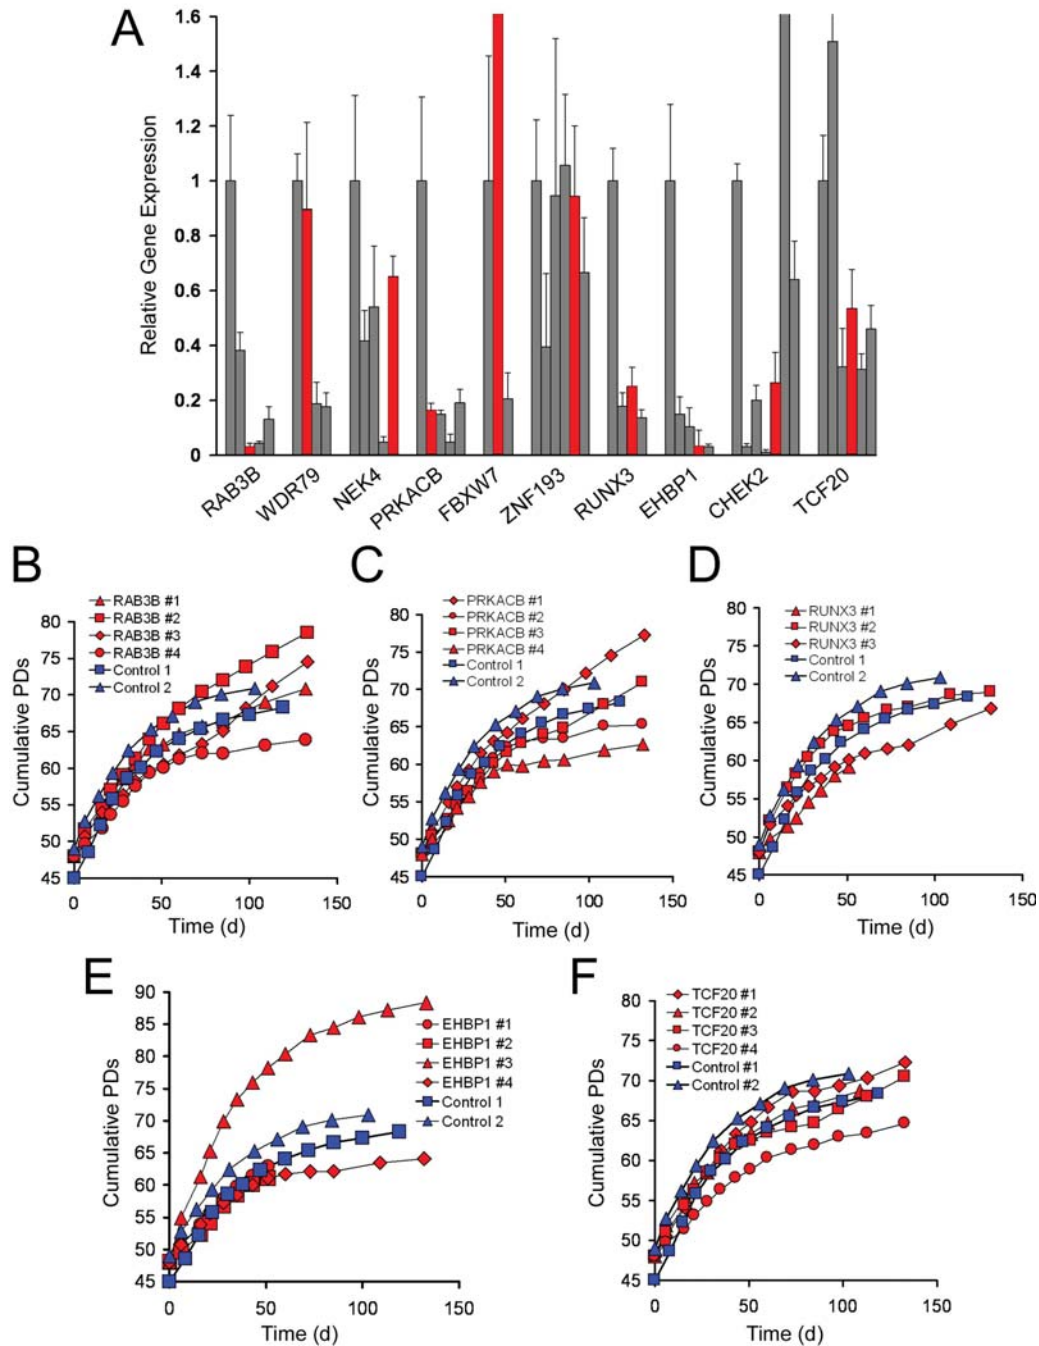

**FIG S1** Validation of identified shRNAs. (A) Validation of identified genes. Suppression of targets by individual shRNAs. shRNAs available from each gene identified in the screen were used to infect BJ cells and the degree of suppression determined. For each gene depicted in the graph, the first bar is a control shRNA normalized to 1, and subsequent bars represent knockdown from shRNAs targeting that gene. Bars colored red indicate the shRNAs isolated from the original screen. Error bars indicate the standard deviation of triplicate measurements. (B-F) Proliferation of cells with suppression of identified genes. Cells described in part A which demonstrated successful knockdown were allowed to proliferate toward replicative senescence. The number of PDs achieved was measured at the time points indicated and reported as the average number in singleton experiments of cumulative PDs for each line.

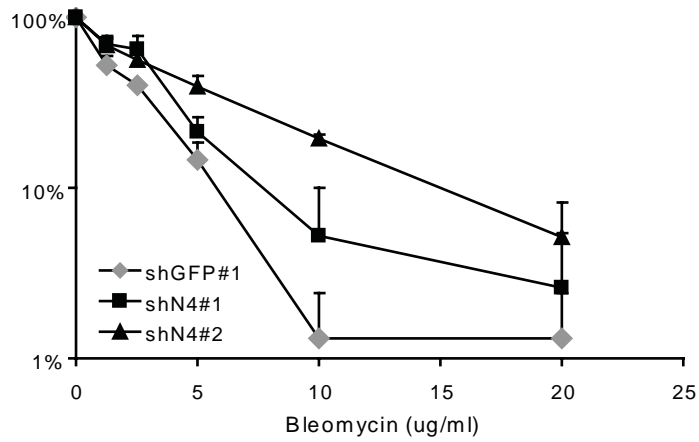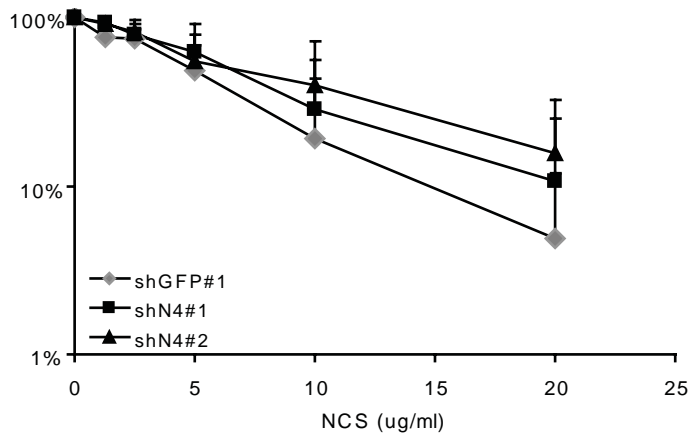

**FIG S2** *NEK4* suppressed cells are less sensitive to double-stranded DNA damaging drugs neocarzinostatin and bleomycin. Colony formation assays to examine sensitivity of control (shGFP #1) or *NEK4* suppressed (shN4 #1 and #2) BJ fibroblasts to treatment with neocarzinostatin (NCS) (top) or bleomycin (bottom). Survival is expressed as a percentage of colonies formed compared to mock-treated cells after treatment with the indicated amounts of drug. Error bars indicate the standard deviation of triplicate experiments.

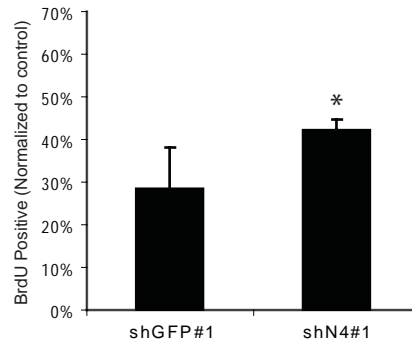

**FIG S3** Suppression of *NEK4* in IMR-90 cells impairs cell cycle arrest. BrdU incorporation assays to assess cell cycle arrest of control (shGFP #1) or *NEK4* suppressed (shN4 #1) IMR-90 fibroblasts in response to treatment with etoposide. Bars indicate the percentage of cells that were BrdU positive following treatment with etoposide, normalized to percentage of BrdU-positive mock-treated cells. Error bars represent the standard deviation of triplicate experiments. \*=  $p < 0.035$ , compared to shGFP #1 control.

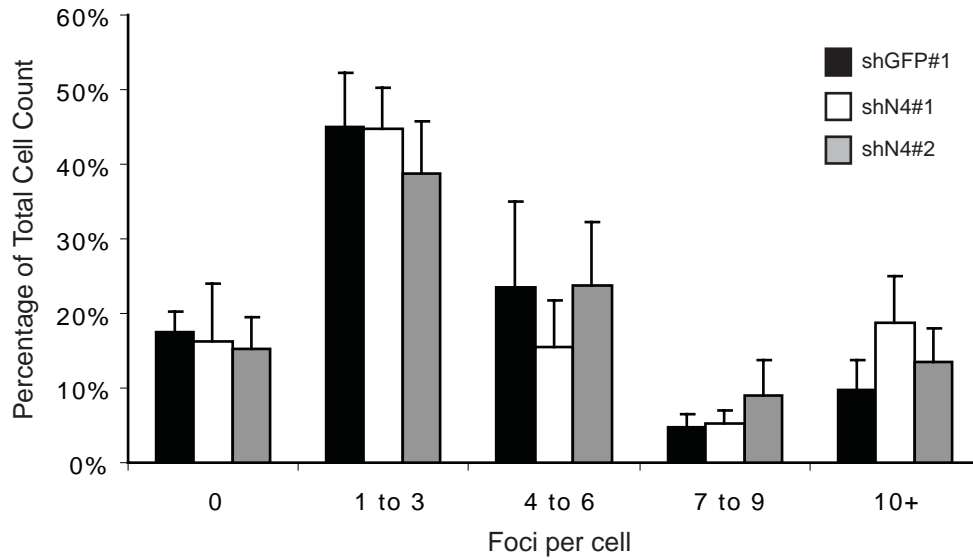

**FIG S4**  $\gamma$ -H2AX foci in BJ shGFP and BJ shN4 cells. The number of  $\gamma$ -H2AX foci were scored in asynchronous BJ cells expressing either a control shRNA (shGFP #1) or one of two shRNAs targeting *NEK4* (shN4 #1 and #2). The bars indicate the percentage of cells that contained the indicated number of foci. At least 150 cells were counted per cell line per replicate. Error bars represent the standard deviation of triplicate experiments.

**Supplemental Table 1**

**Identity of genes targeted in each shRNA pool**

**POOL 1**

| <b>Symbol</b> | <b>NCBI Gene ID</b> | <b>Description</b>                                                                      | <b>Number of shRNAs</b> |
|---------------|---------------------|-----------------------------------------------------------------------------------------|-------------------------|
| AASDHPPT      | 60496               | Aminoadipate-semialdehyde dehydrogenase-phosphopantetheinyl transferase                 | 5                       |
| ACAD11        | 84129               | Acyl-Coenzyme A dehydrogenase family, member 11                                         | 5                       |
| ACAD9         | 28976               | Acyl-Coenzyme A dehydrogenase family, member 9                                          | 5                       |
| ACTB          | 60                  | Actin, beta                                                                             | 4                       |
| ACTG1         | 71                  | Actin, gamma 1                                                                          | 5                       |
| ACTR3         | 10096               | ARP3 actin-related protein 3 homolog (yeast)                                            | 5                       |
| ADH4          | 127                 | Alcohol dehydrogenase 4 (class II), pi polypeptide                                      | 5                       |
| ADH5          | 128                 | Alcohol dehydrogenase 5 (class III), chi polypeptide                                    | 5                       |
| ADH5P4        | 285802              | alcohol dehydrogenase 5B                                                                | 5                       |
| ADH6          | 130                 | Alcohol dehydrogenase 6 (class V)                                                       | 5                       |
| ADH7          | 131                 | Alcohol dehydrogenase 7 (class IV), mu or sigma polypeptide                             | 5                       |
| AKR1C3        | 8644                | Aldo-keto reductase family 1, member C3 (3-alpha hydroxysteroid dehydrogenase, type II) | 5                       |
| ALDH1A1       | 216                 | Aldehyde dehydrogenase 1 family, member A1                                              | 5                       |
| ALDH1A3       | 220                 | Aldehyde dehydrogenase 1 family, member A3                                              | 5                       |
| ALDH1B1       | 219                 | Aldehyde dehydrogenase 1 family, member B1                                              | 4                       |
| ALDH2         | 217                 | Aldehyde dehydrogenase 2 family (mitochondrial)                                         | 5                       |
| ALDH3A1       | 218                 | Aldehyde dehydrogenase 3 family, member A1                                              | 5                       |
| ALDH3A2       | 224                 | Aldehyde dehydrogenase 3 family, member A2                                              | 5                       |
| ALDH3B1       | 221                 | Aldehyde dehydrogenase 3 family, member B1                                              | 4                       |
| ALDH3B2       | 222                 | Aldehyde dehydrogenase 3 family, member B2                                              | 4                       |
| ALDH7A1       | 501                 | Aldehyde dehydrogenase 7 family, member A1                                              | 5                       |
| ALDH8A1       | 64577               | Aldehyde dehydrogenase 8 family, member A1                                              | 4                       |
| ALDH9A1       | 223                 | Aldehyde dehydrogenase 9 family, member A1                                              | 5                       |
| ANXA5         | 308                 | Annexin A5                                                                              | 5                       |
| APOD          | 347                 | Apolipoprotein D                                                                        | 5                       |
| ARHGAP26      | 23092               | Rho GTPase activating protein 26                                                        | 5                       |
| ARHGEF5       | 7984                | Rho guanine nucleotide exchange factor (GEF) 5                                          | 5                       |
| ARSB          | 411                 | Arylsulfatase B                                                                         | 5                       |
| ASAH1         | 427                 | N-acylsphingosine amidohydrolase (acid ceramidase) 1                                    | 5                       |
| ATP5F1        | 515                 | ATP synthase, H+ transporting, mitochondrial F0 complex, subunit B1                     | 5                       |
| ATP6V0C       | 527                 | ATPase, H+ transporting, lysosomal 16kDa, V0 subunit c                                  | 4                       |
| ATP6V1A       | 523                 | ATPase, H+ transporting, lysosomal 70kDa, V1 subunit A                                  | 5                       |

|               |        |                                                                                         |   |
|---------------|--------|-----------------------------------------------------------------------------------------|---|
| ATP6V1B1      | 525    | ATPase, H+ transporting, lysosomal 56/58kDa, V1 subunit B1 (Renal tubular acidosis with | 4 |
| ATP6V1B2      | 526    | ATPase, H+ transporting, lysosomal 56/58kDa, V1 subunit B2                              | 5 |
| ATP6V1C1      | 528    | ATPase, H+ transporting, lysosomal 42kDa, V1 subunit C1                                 | 4 |
| ATP6V1E1      | 529    | ATPase, H+ transporting, lysosomal 31kDa, V1 subunit E1                                 | 5 |
| BCKDHA        | 593    | Branched chain keto acid dehydrogenase E1, alpha polypeptide                            | 5 |
| BCKDHB        | 594    | Branched chain keto acid dehydrogenase E1, beta polypeptide (maple syrup urine disease) | 5 |
| BDH1          | 622    | 3-hydroxybutyrate dehydrogenase, type 1                                                 | 5 |
| BMX           | 660    | BMX non-receptor tyrosine kinase                                                        | 5 |
| C9orf53       | 51198  | Chromosome 9 open reading frame 53                                                      | 4 |
| CABP1         | 9478   | Calcium binding protein 1                                                               | 5 |
| CANX          | 821    | Calnexin                                                                                | 5 |
| CAP1          | 10487  | CAP, adenylate cyclase-associated protein 1 (yeast)                                     | 5 |
| CAPG          | 822    | Capping protein (actin filament), gelsolin-like                                         | 5 |
| CAPZB         | 832    | Capping protein (actin filament) muscle Z-line, beta                                    | 5 |
| CCT2          | 10576  | Chaperonin containing TCP1, subunit 2 (beta)                                            | 5 |
| CCT5          | 22948  | Chaperonin containing TCP1, subunit 5 (epsilon)                                         | 5 |
| CHDH          | 55349  | Choline dehydrogenase                                                                   | 5 |
| CIT           | 11113  | Citron (rho-interacting, serine/threonine kinase 21)                                    | 5 |
| CLEC4M        | 10332  | C-type lectin domain family 4, member M                                                 | 5 |
| CORO1A        | 11151  | Coronin, actin binding protein, 1A                                                      | 5 |
| CR1           | 1378   | Complement component (3b/4b) receptor 1 (Knops blood group)                             | 5 |
| CRKL          | 1399   | V-crk sarcoma virus CT10 oncogene homolog (avian)-like                                  | 5 |
| CYP4A22       | 284541 | cytochrome P450, family 4, subunit                                                      | 5 |
| DDEF2         | 8853   | Development and differentiation enhancing factor 2                                      | 4 |
| DHDH          | 27294  | Dihydrodiol dehydrogenase (dimeric)                                                     | 4 |
| DHRS2         | 10202  | Dehydrogenase/reductase (SDR family) member 2                                           | 5 |
| DHRS4L2       | 317749 | Dehydrogenase/reductase (SDR family) member 4 like 2                                    | 5 |
| DHRS7         | 51635  | Dehydrogenase/reductase (SDR family) member 7                                           | 5 |
| DHRSX         | 207063 | Dehydrogenase/reductase (SDR family) X-linked                                           | 5 |
| DHTKD1        | 55526  | Dehydrogenase E1 and transketolase domain containing 1                                  | 5 |
| DKFZP761H1710 | 83459  | hypothetical protein DKFZp761H                                                          | 5 |
| DOCK1         | 1793   | Dedicator of cytokinesis 1                                                              | 5 |
| DUX3          | 26582  | double homeobox, 3                                                                      | 4 |
| DUX5          | 26581  | double homeobox, 5                                                                      | 3 |
| E2F7          | 144455 | E2F transcription factor 7                                                              | 5 |
| E2F8          | 79733  | E2F transcription factor 8                                                              | 5 |
| EEA1          | 8411   | Early endosome antigen 1                                                                | 5 |
| EEF1A1        | 1915   | Eukaryotic translation elongation factor 1 alpha 1                                      | 5 |

|          |        |                                                                                         |   |
|----------|--------|-----------------------------------------------------------------------------------------|---|
| ELMO1    | 9844   | Engulfment and cell motility 1                                                          | 5 |
| ELMO2    | 63916  | Engulfment and cell motility 2                                                          | 5 |
| ELMO3    | 79767  | Engulfment and cell motility 3                                                          | 5 |
| ENO1     | 2023   | Enolase 1, (alpha)                                                                      | 5 |
| ERP29    | 10961  | Endoplasmic reticulum protein 29                                                        | 5 |
| EXOSC10  | 5394   | Exosome component 10                                                                    | 5 |
| FASTK    | 10922  | Fas-activated serine/threonine kinase                                                   | 5 |
| FCAR     | 2204   | Fc fragment of IgA, receptor for                                                        | 5 |
| FCER1A   | 2205   | Fc fragment of IgE, high affinity I, receptor for; alpha polypeptide                    | 5 |
| FCER2    | 2208   | Fc fragment of IgE, low affinity II, receptor for (CD23)                                | 4 |
| FCGR1A   | 2209   | Fc fragment of IgG, high affinity Ia, receptor (CD64)                                   | 5 |
| FCGR2A   | 2212   | Fc fragment of IgG, low affinity IIa, receptor (CD32)                                   | 5 |
| FCGR2B   | 2213   | Fc fragment of IgG, low affinity IIb, receptor (CD32)                                   | 5 |
| FCGR2C   | 9103   | Fc fragment of IgG, low affinity IIc, receptor for (CD32)                               | 4 |
| FCGR3B   | 2215   | Fc fragment of IgG, low affinity                                                        | 5 |
| FERD3L   | 222894 | Fer3-like (Drosophila)                                                                  | 3 |
| FLOT1    | 10211  | Flotillin 1                                                                             | 5 |
| FTH1     | 2495   | Ferritin, heavy polypeptide 1                                                           | 5 |
| FTL      | 2512   | Ferritin, light polypeptide                                                             | 5 |
| GAPDHS   | 26330  | Glyceraldehyde-3-phosphate dehydrogenase, spermatogenic                                 | 4 |
| GBA      | 2629   | Glucosidase, beta; acid (includes glucosylceramidase)                                   | 4 |
| GLMN     | 11146  | Glomulin, FKBP associated protein                                                       | 4 |
| GNAI2    | 2771   | Guanine nucleotide binding protein (G protein), alpha inhibiting activity polypeptide 2 | 5 |
| GNB2     | 2783   | Guanine nucleotide binding protein (G protein), beta polypeptide 2                      | 5 |
| GRB2     | 2885   | Growth factor receptor-bound protein 2                                                  | 5 |
| GUSB     | 2990   | Glucuronidase, beta                                                                     | 5 |
| HADH     | 3033   | Hydroxyacyl-Coenzyme A dehydrogenase                                                    | 5 |
| HADHB    | 3032   | Hydroxyacyl-Coenzyme A dehydrogenase/3-ketoacyl-Coenzyme A thiolase/enoyl-Coenzy        | 5 |
| HBA1     | 3039   | Hemoglobin, alpha 1                                                                     | 3 |
| HBA2     | 3040   | Hemoglobin, alpha 2                                                                     | 5 |
| HBB      | 3043   | Hemoglobin, beta                                                                        | 5 |
| HEXA     | 3073   | Hexosaminidase A (alpha polypeptide)                                                    | 5 |
| HEXB     | 3074   | Hexosaminidase B (beta polypeptide)                                                     | 5 |
| HNRPA1   | 3178   | heterogeneous nuclear ribonucl                                                          | 5 |
| HSD11B1  | 3290   | Hydroxysteroid (11-beta) dehydrogenase 1                                                | 4 |
| HSD11B2  | 3291   | Hydroxysteroid (11-beta) dehydrogenase 2                                                | 5 |
| HSD17B1  | 3292   | Hydroxysteroid (17-beta) dehydrogenase 1                                                | 4 |
| HSD17B12 | 51144  | Hydroxysteroid (17-beta) dehydrogenase 12                                               | 5 |

|          |        |                                                                                          |   |
|----------|--------|------------------------------------------------------------------------------------------|---|
| HSD17B13 | 345275 | short-chain dehydrogenase/redu                                                           | 5 |
| HSD17B7  | 51478  | Hydroxysteroid (17-beta) dehydrogenase 7                                                 | 5 |
| HSD17B8  | 7923   | Hydroxysteroid (17-beta) dehydrogenase 8                                                 | 5 |
| HSD3B7   | 80270  | Hydroxy-delta-5-steroid dehydrogenase, 3 beta- and steroid delta-isomerase 7             | 4 |
| HSDL1    | 83693  | Hydroxysteroid dehydrogenase like 1                                                      | 5 |
| HSF2BP   | 11077  | Heat shock transcription factor 2 binding protein                                        | 5 |
| HSFY1    | 86614  | Heat shock transcription factor, Y-linked 1                                              | 5 |
| HSP90B1  | 7184   | Heat shock protein 90kDa beta (Grp94), member 1                                          | 4 |
| HSPA1L   | 3305   | Heat shock 70kDa protein 1-like                                                          | 5 |
| HSPA2    | 3306   | Heat shock 70kDa protein 2                                                               | 5 |
| HSPA9B   | 3313   | heat shock 70kDa protein 9B (m                                                           | 5 |
| HSPC105  | 93517  | NAD(P) dependent steroid dehydrogenase-like                                              | 4 |
| HSPD1    | 3329   | Heat shock 60kDa protein 1 (chaperonin)                                                  | 5 |
| HTATSF1  | 27336  | HIV-1 Tat specific factor 1                                                              | 5 |
| HYOU1    | 10525  | Hypoxia up-regulated 1                                                                   | 5 |
| ICAM1    | 3383   | Intercellular adhesion molecule 1 (CD54), human rhinovirus receptor                      | 5 |
| ICK      | 22858  | Intestinal cell (MAK-like) kinase                                                        | 5 |
| IDUA     | 3425   | Iduronidase, alpha-L-                                                                    | 5 |
| IFI30    | 10437  | Interferon, gamma-inducible protein 30                                                   | 5 |
| IFNA1    | 3439   | Interferon, alpha 1                                                                      | 5 |
| IFNA10   | 3446   | Interferon, alpha 10                                                                     | 5 |
| IFNA13   | 3447   | Interferon, alpha 13                                                                     | 5 |
| IFNA14   | 3448   | Interferon, alpha 14                                                                     | 5 |
| IFNA16   | 3449   | Interferon, alpha 16                                                                     | 5 |
| IFNA17   | 3451   | Interferon, alpha 17                                                                     | 4 |
| IFNA2    | 3440   | Interferon, alpha 2                                                                      | 5 |
| IFNA4    | 3441   | Interferon, alpha 4                                                                      | 5 |
| IFNA5    | 3442   | Interferon, alpha 5                                                                      | 5 |
| IFNA6    | 3443   | Interferon, alpha 6                                                                      | 5 |
| IFNA7    | 3444   | Interferon, alpha 7                                                                      | 5 |
| IFNA8    | 3445   | Interferon, alpha 8                                                                      | 5 |
| IFNE1    | 338376 | Interferon epsilon 1                                                                     | 5 |
| IGFBP2   | 3485   | Insulin-like growth factor binding protein 2, 36kDa                                      | 4 |
| IMPDH1   | 3614   | IMP (inosine monophosphate) dehydrogenase 1                                              | 5 |
| IMPDH2   | 3615   | IMP (inosine monophosphate) dehydrogenase 2                                              | 5 |
| ITGA5    | 3678   | Integrin, alpha 5 (fibronectin receptor, alpha polypeptide)                              | 4 |
| ITGAL    | 3683   | Integrin, alpha L (antigen CD11A (p180), lymphocyte function-associated antigen 1; alpha | 5 |
| ITGAM    | 3684   | Integrin, alpha M (complement component 3 receptor 3 subunit)                            | 5 |



|           |        |                                                                                            |   |
|-----------|--------|--------------------------------------------------------------------------------------------|---|
| ITGAX     | 3687   | Integrin, alpha X (complement component 3 receptor 4 subunit)                              | 5 |
| ITGB1     | 3688   | Integrin, beta 1 (fibronectin receptor, beta polypeptide, antigen CD29 includes MDF2, MSK) | 5 |
| ITGB2     | 3689   | Integrin, beta 2 (complement component 3 receptor 3 and 4 subunit)                         | 5 |
| IVD       | 3712   | Isovaleryl Coenzyme A dehydrogenase                                                        | 5 |
| KIAA2026  | 158358 | KIAA2026                                                                                   | 5 |
| KLHL9     | 55958  | Kelch-like 9 (Drosophila)                                                                  | 5 |
| LAMP1     | 3916   | Lysosomal-associated membrane protein 1                                                    | 5 |
| LAMP2     | 3920   | Lysosomal-associated membrane protein 2                                                    | 5 |
| LCP2      | 3937   | Lymphocyte cytosolic protein 2 (SH2 domain containing leukocyte protein of 76kDa)          | 5 |
| LDHA      | 3939   | Lactate dehydrogenase A                                                                    | 5 |
| LDHAL6B   | 92483  | Lactate dehydrogenase A-like 6B                                                            | 5 |
| LGALS3    | 3958   | Lectin, galactoside-binding, soluble, 3                                                    | 5 |
| LGALS3BP  | 3959   | Lectin, galactoside-binding, soluble, 3 binding protein                                    | 4 |
| LGMN      | 5641   | Legumain                                                                                   | 5 |
| LHX4      | 89884  | LIM homeobox 4                                                                             | 5 |
| LIPA      | 3988   | Lipase A, lysosomal acid, cholesterol esterase (Wolman disease)                            | 5 |
| LMNB1     | 4001   | Lamin B1                                                                                   | 5 |
| LOC128102 | 128102 | 3-beta-hydroxysteroid dehydrogenase, tissue-type heart                                     | 5 |
| LOC220729 | 220729 | Succinate dehydrogenase complex, subunit A, flavoprotein pseudogene                        | 5 |
| LOC346085 | 346085 | Hypothetical LOC346085                                                                     | 5 |
| LOC402530 | 402530 | similar to RIKEN cDNA 2610034N                                                             | 5 |
| LONRF1    | 91694  | LON peptidase N-terminal domain and ring finger 1                                          | 4 |
| MAD1L1    | 8379   | MAD1 mitotic arrest deficient-like 1 (yeast)                                               | 5 |
| MAD2L1    | 4085   | MAD2 mitotic arrest deficient-like 1 (yeast)                                               | 5 |
| MAD2L2    | 10459  | MAD2 mitotic arrest deficient-like 2 (yeast)                                               | 5 |
| MAGOH     | 4116   | Mago-nashi homolog, proliferation-associated (Drosophila)                                  | 4 |
| MARCKS    | 4082   | Myristoylated alanine-rich protein kinase C substrate                                      | 5 |
| MARK1     | 4139   | MAP/microtubule affinity-regulating kinase 1                                               | 5 |
| MFGE8     | 4240   | Milk fat globule-EGF factor 8 protein                                                      | 5 |
| MS4A2     | 2206   | Membrane-spanning 4-domains, subfamily A, member 2 (Fc fragment of IgE, high affinity)     | 4 |
| MTAP      | 4507   | Methylthioadenosine phosphorylase                                                          | 5 |
| MYH9      | 4627   | Myosin, heavy chain 9, non-muscle                                                          | 5 |
| NAPSA     | 9476   | Napsin A aspartic peptidase                                                                | 5 |
| NDUFA1    | 4694   | NADH dehydrogenase (ubiquinone) 1 alpha subcomplex, 1, 7.5kDa                              | 5 |
| NDUFA10   | 4705   | NADH dehydrogenase (ubiquinone) 1 alpha subcomplex, 10, 42kDa                              | 5 |
| NDUFA2    | 4695   | NADH dehydrogenase (ubiquinone) 1 alpha subcomplex, 2, 8kDa                                | 4 |
| NDUFA3    | 4696   | NADH dehydrogenase (ubiquinone) 1 alpha subcomplex, 3, 9kDa                                | 4 |
| NDUFA4    | 4697   | NADH dehydrogenase (ubiquinone) 1 alpha subcomplex, 4, 9kDa                                | 5 |

|          |        |                                                                                 |   |
|----------|--------|---------------------------------------------------------------------------------|---|
| NDUFA5   | 4698   | NADH dehydrogenase (ubiquinone) 1 alpha subcomplex, 5, 13kDa                    | 5 |
| NDUFA6   | 4700   | NADH dehydrogenase (ubiquinone) 1 alpha subcomplex, 6, 14kDa                    | 5 |
| NDUFA7   | 4701   | NADH dehydrogenase (ubiquinone) 1 alpha subcomplex, 7, 14.5kDa                  | 3 |
| NDUFA8   | 4702   | NADH dehydrogenase (ubiquinone) 1 alpha subcomplex, 8, 19kDa                    | 5 |
| NDUFA9   | 4704   | NADH dehydrogenase (ubiquinone) 1 alpha subcomplex, 9, 39kDa                    | 5 |
| NDUFAB1  | 4706   | NADH dehydrogenase (ubiquinone) 1, alpha/beta subcomplex, 1, 8kDa               | 5 |
| NDUFAF1  | 51103  | NADH dehydrogenase (ubiquinone) 1 alpha subcomplex, assembly factor 1           | 5 |
| NDUFB1   | 4707   | NADH dehydrogenase (ubiquinone) 1 beta subcomplex, 1, 7kDa                      | 5 |
| NDUFB3   | 4709   | NADH dehydrogenase (ubiquinone) 1 beta subcomplex, 3, 12kDa                     | 5 |
| NDUFB4   | 4710   | NADH dehydrogenase (ubiquinone) 1 beta subcomplex, 4, 15kDa                     | 5 |
| NDUFB5   | 4711   | NADH dehydrogenase (ubiquinone) 1 beta subcomplex, 5, 16kDa                     | 5 |
| NDUFB6   | 4712   | NADH dehydrogenase (ubiquinone) 1 beta subcomplex, 6, 17kDa                     | 5 |
| NDUFB7   | 4713   | NADH dehydrogenase (ubiquinone) 1 beta subcomplex, 7, 18kDa                     | 3 |
| NDUFB8   | 4714   | NADH dehydrogenase (ubiquinone) 1 beta subcomplex, 8, 19kDa                     | 5 |
| NDUFB9   | 4715   | NADH dehydrogenase (ubiquinone) 1 beta subcomplex, 9, 22kDa                     | 5 |
| NPC2     | 10577  | Niemann-Pick disease, type C2                                                   | 5 |
| NSDHL    | 50814  | NAD(P) dependent steroid dehydrogenase-like                                     | 5 |
| NSF      | 4905   | N-ethylmaleimide-sensitive factor                                               | 5 |
| PCTK3    | 5129   | PCTAIRE protein kinase 3                                                        | 5 |
| PDCD6IP  | 10015  | Programmed cell death 6 interacting protein                                     | 5 |
| PGAM1    | 5223   | Phosphoglycerate mutase 1 (brain)                                               | 5 |
| PHB      | 5245   | Prohibitin                                                                      | 5 |
| PITPNM1  | 9600   | Phosphatidylinositol transfer protein, membrane-associated 1                    | 4 |
| PITPNM2  | 57605  | Phosphatidylinositol transfer protein, membrane-associated 2                    | 5 |
| PITPNM3  | 83394  | PITPNM family member 3                                                          | 5 |
| PKLR     | 5313   | Pyruvate kinase, liver and RBC                                                  | 5 |
| PPT1     | 5538   | Palmitoyl-protein thioesterase 1 (ceroid-lipofuscinosis, neuronal 1, infantile) | 4 |
| PPT2     | 9374   | Palmitoyl-protein thioesterase 2                                                | 5 |
| PRDX1    | 5052   | Peroxiredoxin 1                                                                 | 5 |
| PRICKLE1 | 144165 | Prickle homolog 1 (Drosophila)                                                  | 5 |
| PRKAG3   | 53632  | Protein kinase, AMP-activated, gamma 3 non-catalytic subunit                    | 4 |
| PRKY     | 5616   | Protein kinase, Y-linked                                                        | 4 |
| PRODH    | 5625   | Proline dehydrogenase (oxidase) 1                                               | 5 |
| PRPF19   | 27339  | PRP19/PSO4 pre-mRNA processing factor 19 homolog (S. cerevisiae)                | 5 |
| PTK9     | 5756   | PTK9 protein tyrosine kinase 9                                                  | 4 |
| RAB7B    | 338382 | RAB7B, member RAS oncogene family                                               | 4 |
| RAI17    | 57178  | retinoic acid induced 17                                                        | 5 |
| RAP1A    | 5906   | RAP1A, member of RAS oncogene family                                            | 5 |

|              |        |                                                                                     |   |
|--------------|--------|-------------------------------------------------------------------------------------|---|
| RAP1GDS1     | 5910   | RAP1, GTP-GDP dissociation stimulator 1                                             | 5 |
| RBJ          | 51277  | Rab and DnaJ domain containing                                                      | 5 |
| RCN1         | 5954   | Reticulocalbin 1, EF-hand calcium binding domain                                    | 5 |
| RCN2         | 5955   | Reticulocalbin 2, EF-hand calcium binding domain                                    | 5 |
| RCN3         | 57333  | Reticulocalbin 3, EF-hand calcium binding domain                                    | 4 |
| RDH11        | 51109  | Retinol dehydrogenase 11 (all-trans/9-cis/11-cis)                                   | 5 |
| RDH14        | 57665  | Retinol dehydrogenase 14 (all-trans/9-cis/11-cis)                                   | 4 |
| RDH8         | 50700  | Retinol dehydrogenase 8 (all-trans)                                                 | 5 |
| RFXDC1       | 222546 | Regulatory factor X domain containing 1                                             | 5 |
| RGS11        | 8786   | Regulator of G-protein signaling 11                                                 | 5 |
| RGS12        | 6002   | Regulator of G-protein signaling 12                                                 | 3 |
| RGS14        | 10636  | Regulator of G-protein signaling 14                                                 | 3 |
| RGS16        | 6004   | Regulator of G-protein signaling 16                                                 | 4 |
| RGS20        | 8601   | Regulator of G-protein signaling 20                                                 | 5 |
| RGS4         | 5999   | Regulator of G-protein signaling 4                                                  | 4 |
| RGS5         | 8490   | Regulator of G-protein signaling 5                                                  | 5 |
| RGS6         | 9628   | Regulator of G-protein signaling 6                                                  | 4 |
| RGS7         | 6000   | Regulator of G-protein signaling 7                                                  | 5 |
| RGS9         | 8787   | Regulator of G-protein signaling 9                                                  | 5 |
| RIPK2        | 8767   | Receptor-interacting serine-threonine kinase 2                                      | 5 |
| RNF135       | 84282  | Ring finger protein 135                                                             | 5 |
| RNF146       | 81847  | Ring finger protein 146                                                             | 5 |
| RNF170       | 81790  | Ring finger protein 170                                                             | 5 |
| RNF185       | 91445  | Ring finger protein 185                                                             | 4 |
| ROM1         | 6094   | Retinal outer segment membrane protein 1                                            | 3 |
| RP11-38O23.2 | 389852 | PNPK6288                                                                            | 5 |
| RPS6KA2      | 6196   | Ribosomal protein S6 kinase, 90kDa, polypeptide 2                                   | 4 |
| RPSA         | 3921   | Ribosomal protein SA                                                                | 5 |
| RSPRY1       | 89970  | Ring finger and SPRY domain containing 1                                            | 5 |
| SCAP1        | 8631   | src family associated phosphop                                                      | 5 |
| SCAP2        | 8935   | src family associated phosphop                                                      | 5 |
| SCARB2       | 950    | Scavenger receptor class B, member 2                                                | 5 |
| SDHA         | 6389   | Succinate dehydrogenase complex, subunit A, flavoprotein (Fp)                       | 5 |
| SDHACL       | 340026 | succinate dehydrogenase comple                                                      | 5 |
| SDHB         | 6390   | Succinate dehydrogenase complex, subunit B, iron sulfur (Ip)                        | 5 |
| SDHC         | 6391   | Succinate dehydrogenase complex, subunit C, integral membrane protein, 15kDa        | 5 |
| SERPINA1     | 5265   | Serpin peptidase inhibitor, clade A (alpha-1 antiproteinase, antitrypsin), member 1 | 5 |
| SF3A1        | 10291  | Splicing factor 3a, subunit 1, 120kDa                                               | 5 |

|        |        |                                                                                          |   |
|--------|--------|------------------------------------------------------------------------------------------|---|
| SF3B2  | 10992  | Splicing factor 3b, subunit 2, 145kDa                                                    | 5 |
| SFRS4  | 6429   | Splicing factor, arginine/serine-rich 4                                                  | 5 |
| SFRS6  | 6431   | Splicing factor, arginine/serine-rich 6                                                  | 5 |
| SFRS9  | 8683   | Splicing factor, arginine/serine-rich 9                                                  | 5 |
| SFTPD  | 6441   | Surfactant, pulmonary-associated protein D                                               | 5 |
| SIRPB1 | 10326  | Signal-regulatory protein beta 1                                                         | 5 |
| SIRPG  | 55423  | Signal-regulatory protein gamma                                                          | 5 |
| SNRPA  | 6626   | Small nuclear ribonucleoprotein polypeptide A                                            | 5 |
| SORD   | 6652   | Sorbitol dehydrogenase                                                                   | 5 |
| SOX18  | 54345  | SRY (sex determining region Y)-box 18                                                    | 4 |
| SOX30  | 11063  | SRY (sex determining region Y)-box 30                                                    | 5 |
| SPRYD5 | 84767  | SPRY domain containing 5                                                                 | 5 |
| SRD5A1 | 6715   | Steroid-5-alpha-reductase, alpha polypeptide 1 (3-oxo-5 alpha-steroid delta 4-dehydrogen | 5 |
| SRD5A2 | 6716   | Steroid-5-alpha-reductase, alpha polypeptide 2 (3-oxo-5 alpha-steroid delta 4-dehydrogen | 5 |
| SYVN1  | 84447  | Synovial apoptosis inhibitor 1, synoviolin                                               | 3 |
| TCEA2  | 6919   | Transcription elongation factor A (SII), 2                                               | 4 |
| TCEA3  | 6920   | Transcription elongation factor A (SII), 3                                               | 5 |
| TGFA   | 7039   | Transforming growth factor, alpha                                                        | 5 |
| THOC2  | 57187  | THO complex 2                                                                            | 4 |
| TK2    | 7084   | Thymidine kinase 2, mitochondrial                                                        | 2 |
| TPM3   | 7170   | Tropomyosin 3                                                                            | 5 |
| TRIM15 | 89870  | Tripartite motif-containing 15                                                           | 4 |
| TRIM34 | 53840  | Tripartite motif-containing 34                                                           | 4 |
| TRIM4  | 89122  | Tripartite motif-containing 4                                                            | 5 |
| TRIM41 | 90933  | Tripartite motif-containing 41                                                           | 5 |
| TRIM47 | 91107  | Tripartite motif-containing 47                                                           | 5 |
| TRIM5  | 85363  | Tripartite motif-containing 5                                                            | 3 |
| TRIM52 | 84851  | Tripartite motif-containing 52                                                           | 5 |
| TRIM55 | 84675  | Tripartite motif-containing 55                                                           | 5 |
| TSLP   | 85480  | Thymic stromal lymphopoietin                                                             | 5 |
| TTK    | 7272   | TTK protein kinase                                                                       | 3 |
| UGDH   | 7358   | UDP-glucose dehydrogenase                                                                | 5 |
| UGT1A1 | 54658  | UDP glycosyltransferase 1 fami                                                           | 5 |
| VAMP3  | 9341   | Vesicle-associated membrane protein 3 (cellubrevin)                                      | 5 |
| VN1R2  | 317701 | Vomeronasal 1 receptor 2                                                                 | 5 |
| VN1R3  | 317702 | Vomeronasal 1 receptor 3                                                                 | 5 |
| VN1R4  | 317703 | Vomeronasal 1 receptor 4                                                                 | 5 |
| VN1R5  | 317705 | Vomeronasal 1 receptor 5                                                                 | 5 |

|         |        |                                                                                      |   |
|---------|--------|--------------------------------------------------------------------------------------|---|
| WAS     | 7454   | Wiskott-Aldrich syndrome (eczema-thrombocytopenia)                                   | 5 |
| WASPIP  | 7456   | Wiskott-Aldrich syndrome prote                                                       | 5 |
| WIRE    | 147179 | WIRE protein                                                                         | 5 |
| XCR1    | 2829   | Chemokine (C motif) receptor 1                                                       | 4 |
| XDH     | 7498   | Xanthine dehydrogenase                                                               | 4 |
| XPR1    | 9213   | Xenotropic and polytropic retrovirus receptor                                        | 5 |
| YWHAZ   | 7534   | Tyrosine 3-monooxygenase/tryptophan 5-monooxygenase activation protein, zeta polypep | 5 |
| ZCCHC3  | 85364  | Zinc finger, CCHC domain containing 3                                                | 5 |
| ZCCHC7  | 84186  | Zinc finger, CCHC domain containing 7                                                | 5 |
| ZCCHC9  | 84240  | Zinc finger, CCHC domain containing 9                                                | 4 |
| ZNF248  | 57209  | Zinc finger protein 248                                                              | 5 |
| ZNF419A | 79744  | zinc finger protein 419                                                              | 5 |

## POOL 2

| Symbol    | NCBI Gene ID | Description                                                                        | Number of shRNAs |
|-----------|--------------|------------------------------------------------------------------------------------|------------------|
| AAK1      | 22848        | AP2 associated kinase 1                                                            | 5                |
| ABL1      | 25           | V-abl Abelson murine leukemia viral oncogene homolog 1                             | 4                |
| ABL2      | 27           | V-abl Abelson murine leukemia viral oncogene homolog 2 (arg, Abelson-related gene) | 5                |
| ACACB     | 32           | Acetyl-Coenzyme A carboxylase beta                                                 | 4                |
| ACP1      | 52           | Acid phosphatase 1, soluble                                                        | 5                |
| ACPP      | 55           | Acid phosphatase, prostate                                                         | 4                |
| ACVR1B    | 91           | Activin A receptor, type IB                                                        | 5                |
| ADCYAP1R1 | 117          | Adenylate cyclase activating polypeptide 1 (pituitary) receptor type I             | 4                |
| ADH5P4    | 285802       | alcohol dehydrogenase 5B                                                           | 5                |
| ADMR      | 11318        | adrenomedullin receptor                                                            | 4                |
| ADORA1    | 134          | Adenosine A1 receptor                                                              | 5                |
| ADORA2A   | 135          | Adenosine A2a receptor                                                             | 5                |
| ADORA3    | 140          | Adenosine A3 receptor                                                              | 5                |
| ADRA1A    | 148          | Adrenergic, alpha-1A-, receptor                                                    | 5                |
| ADRA1B    | 147          | Adrenergic, alpha-1B-, receptor                                                    | 5                |
| ADRA1D    | 146          | Adrenergic, alpha-1D-, receptor                                                    | 4                |
| ADRA2A    | 150          | Adrenergic, alpha-2A-, receptor                                                    | 4                |
| ADRA2B    | 151          | Adrenergic, alpha-2B-, receptor                                                    | 5                |
| ADRA2C    | 152          | Adrenergic, alpha-2C-, receptor                                                    | 4                |
| ADRB1     | 153          | Adrenergic, beta-1-, receptor                                                      | 5                |
| ADRB2     | 154          | Adrenergic, beta-2-, receptor, surface                                             | 4                |
| ADRB3     | 155          | Adrenergic, beta-3-, receptor                                                      | 5                |
| ADRBK2    | 157          | Adrenergic, beta, receptor kinase 2                                                | 4                |

|          |        |                                                                                            |   |
|----------|--------|--------------------------------------------------------------------------------------------|---|
| AGTR1    | 185    | Angiotensin II receptor, type 1                                                            | 5 |
| AGTR2    | 186    | Angiotensin II receptor, type 2                                                            | 4 |
| AGTRL1   | 187    | Angiotensin II receptor-like 1                                                             | 5 |
| AKAP11   | 11215  | A kinase (PRKA) anchor protein 11                                                          | 5 |
| AKAP5    | 9495   | A kinase (PRKA) anchor protein 5                                                           | 4 |
| AKT3     | 10000  | V-akt murine thymoma viral oncogene homolog 3 (protein kinase B, gamma)                    | 5 |
| ALS2CR7  | 65061  | amyotrophic lateral sclerosis                                                              | 5 |
| AMFR     | 267    | Autocrine motility factor receptor                                                         | 3 |
| AMHR2    | 269    | Anti-Mullerian hormone receptor, type II                                                   | 5 |
| AMPH     | 273    | Amphiphysin                                                                                | 4 |
| ANAPC10  | 10393  | Anaphase promoting complex subunit 10                                                      | 4 |
| ANAPC2   | 29882  | Anaphase promoting complex subunit 2                                                       | 4 |
| ANAPC4   | 29945  | Anaphase promoting complex subunit 4                                                       | 5 |
| ANAPC5   | 51433  | Anaphase promoting complex subunit 5                                                       | 5 |
| ANKK1    | 255239 | Ankyrin repeat and kinase domain containing 1                                              | 3 |
| ANUBL1   | 93550  | AN1, ubiquitin-like, homolog ( <i>Xenopus laevis</i> )                                     | 5 |
| APOB     | 338    | Apolipoprotein B (including Ag(x) antigen)                                                 | 5 |
| APOE     | 348    | Apolipoprotein E                                                                           | 3 |
| AR       | 367    | Androgen receptor (dihydrotestosterone receptor; testicular feminization; spinal and bulba | 5 |
| ARHGAP29 | 9411   | Rho GTPase activating protein 29                                                           | 5 |
| ARHGDI1A | 396    | Rho GDP dissociation inhibitor (GDI) alpha                                                 | 4 |
| ARHGEF2  | 9181   | Rho/rac guanine nucleotide exchange factor (GEF) 2                                         | 4 |
| ARNT     | 405    | Aryl hydrocarbon receptor nuclear translocator                                             | 5 |
| ATG7     | 10533  | ATG7 autophagy related 7 homolog ( <i>S. cerevisiae</i> )                                  | 5 |
| ATXN1    | 6310   | Ataxin 1                                                                                   | 5 |
| AUP1     | 550    | Ancient ubiquitous protein 1                                                               | 4 |
| AURKC    | 6795   | Aurora kinase C                                                                            | 4 |
| AVPR1A   | 552    | Arginine vasopressin receptor 1A                                                           | 4 |
| AVPR1B   | 553    | Arginine vasopressin receptor 1B                                                           | 3 |
| AVPR2    | 554    | Arginine vasopressin receptor 2 (nephrogenic diabetes insipidus)                           | 4 |
| AXL      | 558    | AXL receptor tyrosine kinase                                                               | 5 |
| BAI1     | 575    | Brain-specific angiogenesis inhibitor 1                                                    | 4 |
| BAI2     | 576    | Brain-specific angiogenesis inhibitor 2                                                    | 5 |
| BAI3     | 577    | Brain-specific angiogenesis inhibitor 3                                                    | 5 |
| BARD1    | 580    | BRCA1 associated RING domain 1                                                             | 5 |
| BCL2L11  | 10018  | BCL2-like 11 (apoptosis facilitator)                                                       | 4 |
| BDKRB1   | 623    | Bradykinin receptor B1                                                                     | 5 |
| BDKRB2   | 624    | Bradykinin receptor B2                                                                     | 5 |

|          |        |                                                                                          |   |
|----------|--------|------------------------------------------------------------------------------------------|---|
| BIRC2    | 329    | Baculoviral IAP repeat-containing 2                                                      | 5 |
| BIRC3    | 330    | Baculoviral IAP repeat-containing 3                                                      | 5 |
| BIRC4    | 331    | Baculoviral IAP repeat-containing 4                                                      | 4 |
| BIRC6    | 57448  | Baculoviral IAP repeat-containing 6 (apollon)                                            | 5 |
| BLM      | 641    | Bloom syndrome                                                                           | 5 |
| BLR1     | 643    | Burkitt lymphoma receptor 1, GTP binding protein (chemokine (C-X-C motif) receptor 5)    | 5 |
| BMP1     | 649    | Bone morphogenetic protein 1                                                             | 5 |
| BNIP3    | 664    | BCL2/adenovirus E1B 19kDa interacting protein 3                                          | 5 |
| BNIP3L   | 665    | BCL2/adenovirus E1B 19kDa interacting protein 3-like                                     | 5 |
| BRAP     | 8315   | BRCA1 associated protein                                                                 | 5 |
| BRS3     | 680    | Bombesin-like receptor 3                                                                 | 5 |
| BRSK1    | 84446  | BR serine/threonine kinase 1                                                             | 5 |
| BTG1     | 694    | B-cell translocation gene 1, anti-proliferative                                          | 5 |
| BTG2     | 7832   | BTG family, member 2                                                                     | 5 |
| C1R      | 715    | Complement component 1, r subcomponent                                                   | 5 |
| C1S      | 716    | Complement component 1, s subcomponent                                                   | 5 |
| C2       | 717    | Complement component 2                                                                   | 5 |
| C21orf6  | 10069  | chromosome 21 open reading fra                                                           | 5 |
| C3AR1    | 719    | Complement component 3a receptor 1                                                       | 4 |
| C3orf29  | 64419  | hypothetical protein FLJ22405                                                            | 4 |
| C3orf48  | 151649 | Chromosome 3 open reading frame 48                                                       | 5 |
| C6orf218 | 221718 | Chromosome 6 open reading frame 218                                                      | 5 |
| CAMK1D   | 57118  | Calcium/calmodulin-dependent protein kinase ID                                           | 5 |
| CAMK1G   | 57172  | Calcium/calmodulin-dependent protein kinase IG                                           | 5 |
| CAMKK1   | 84254  | Calcium/calmodulin-dependent protein kinase kinase 1, alpha                              | 5 |
| CAMKK2   | 10645  | Calcium/calmodulin-dependent protein kinase kinase 2, beta                               | 5 |
| CAND1    | 55832  | Cullin-associated and neddylation-dissociated 1                                          | 5 |
| CAPN1    | 823    | Calpain 1, (mu/I) large subunit                                                          | 5 |
| CAPN2    | 824    | Calpain 2, (m/II) large subunit                                                          | 5 |
| CAPN3    | 825    | Calpain 3, (p94)                                                                         | 5 |
| CAPN6    | 827    | Calpain 6                                                                                | 5 |
| CAPNS1   | 826    | Calpain, small subunit 1                                                                 | 5 |
| CARM1    | 10498  | Coactivator-associated arginine methyltransferase 1                                      | 4 |
| CASP1    | 834    | Caspase 1, apoptosis-related cysteine peptidase (interleukin 1, beta, convertase)        | 3 |
| CASP10   | 843    | Caspase 10, apoptosis-related cysteine peptidase                                         | 5 |
| CASP2    | 835    | Caspase 2, apoptosis-related cysteine peptidase (neural precursor cell expressed, develo | 5 |
| CASP3    | 836    | Caspase 3, apoptosis-related cysteine peptidase                                          | 4 |
| CASP4    | 837    | Caspase 4, apoptosis-related cysteine peptidase                                          | 5 |

|          |        |                                                                                    |   |
|----------|--------|------------------------------------------------------------------------------------|---|
| CASP5    | 838    | Caspase 5, apoptosis-related cysteine peptidase                                    | 5 |
| CASP6    | 839    | Caspase 6, apoptosis-related cysteine peptidase                                    | 4 |
| CASP7    | 840    | Caspase 7, apoptosis-related cysteine peptidase                                    | 5 |
| CASP8    | 841    | Caspase 8, apoptosis-related cysteine peptidase                                    | 5 |
| CASP9    | 842    | Caspase 9, apoptosis-related cysteine peptidase                                    | 5 |
| CAV1     | 857    | Caveolin 1, caveolae protein, 22kDa                                                | 4 |
| CBLB     | 868    | Cas-Br-M (murine) ecotropic retroviral transforming sequence b                     | 4 |
| CBLC     | 23624  | Cas-Br-M (murine) ecotropic retroviral transforming sequence c                     | 3 |
| CBX4     | 8535   | Chromobox homolog 4 (Pc class homolog, Drosophila)                                 | 3 |
| CC2D1A   | 54862  | Coiled-coil and C2 domain containing 1A                                            | 5 |
| CCNB1IP1 | 57820  | Cyclin B1 interacting protein 1                                                    | 5 |
| CCND3    | 896    | Cyclin D3                                                                          | 5 |
| CCNF     | 899    | Cyclin F                                                                           | 5 |
| CCR2     | 1231   | Chemokine (C-C motif) receptor 2                                                   | 5 |
| CCRK     | 23552  | Cell cycle related kinase                                                          | 4 |
| CCRN4L   | 25819  | CCR4 carbon catabolite repression 4-like ( <i>S. cerevisiae</i> )                  | 5 |
| CD47     | 961    | CD47 molecule                                                                      | 5 |
| CD63     | 967    | CD63 molecule                                                                      | 5 |
| CD86     | 942    | CD86 molecule                                                                      | 4 |
| CDC14A   | 8556   | CDC14 cell division cycle 14 homolog A ( <i>S. cerevisiae</i> )                    | 5 |
| CDC14C   | 168448 | CDC14 cell division cycle 14 homolog C ( <i>S. cerevisiae</i> )                    | 5 |
| CDC20    | 991    | Cell division cycle 20 homolog ( <i>S. cerevisiae</i> )                            | 5 |
| CDC25A   | 993    | Cell division cycle 25 homolog A ( <i>S. pombe</i> )                               | 3 |
| CDC25B   | 994    | Cell division cycle 25 homolog B ( <i>S. pombe</i> )                               | 5 |
| CDC25C   | 995    | Cell division cycle 25 homolog C ( <i>S. pombe</i> )                               | 4 |
| CDC2L6   | 23097  | Cell division cycle 2-like 6 (CDK8-like)                                           | 5 |
| CDC40    | 51362  | Cell division cycle 40 homolog ( <i>S. cerevisiae</i> )                            | 5 |
| CDC42BPA | 8476   | CDC42 binding protein kinase alpha (DMPK-like)                                     | 5 |
| CDC7     | 8317   | Cell division cycle 7 homolog ( <i>S. cerevisiae</i> )                             | 5 |
| CDCA8    | 55143  | Cell division cycle associated 8                                                   | 5 |
| CDKL3    | 51265  | Cyclin-dependent kinase-like 3                                                     | 5 |
| CDKL5    | 6792   | Cyclin-dependent kinase-like 5                                                     | 5 |
| CDKN3    | 1033   | Cyclin-dependent kinase inhibitor 3 (CDK2-associated dual specificity phosphatase) | 5 |
| CEBPG    | 1054   | CCAAT/enhancer binding protein (C/EBP), gamma                                      | 4 |
| CFB      | 629    | Complement factor B                                                                | 5 |
| CFLAR    | 8837   | CASP8 and FADD-like apoptosis regulator                                            | 5 |
| CHD1L    | 9557   | Chromodomain helicase DNA binding protein 1-like                                   | 4 |
| CHFR     | 55743  | Checkpoint with forkhead and ring finger domains                                   | 5 |



|         |        |                                                                                           |   |
|---------|--------|-------------------------------------------------------------------------------------------|---|
| CILP    | 8483   | Cartilage intermediate layer protein, nucleotide pyrophosphohydrolase                     | 5 |
| CLK4    | 57396  | CDC-like kinase 4                                                                         | 4 |
| CMA1    | 1215   | Chymase 1, mast cell                                                                      | 5 |
| COL3A1  | 1281   | Collagen, type III, alpha 1 (Ehlers-Danlos syndrome type IV, autosomal dominant)          | 5 |
| COL6A3  | 1293   | Collagen, type VI, alpha 3                                                                | 5 |
| COL7A1  | 1294   | Collagen, type VII, alpha 1 (epidermolysis bullosa, dystrophic, dominant and recessive)   | 4 |
| COPS8   | 10920  | COP9 constitutive photomorphogenic homolog subunit 8 (Arabidopsis)                        | 5 |
| CPNE2   | 221184 | Copine II                                                                                 | 4 |
| CPT2    | 1376   | Carnitine palmitoyltransferase II                                                         | 5 |
| CREB5   | 9586   | CAMP responsive element binding protein 5                                                 | 4 |
| CRKRS   | 51755  | Cdc2-related kinase, arginine/serine-rich                                                 | 5 |
| CRYAB   | 1410   | Crystallin, alpha B                                                                       | 3 |
| CSF1R   | 1436   | Colony stimulating factor 1 receptor, formerly McDonough feline sarcoma viral (v-fms) onc | 3 |
| CSNK1D  | 1453   | Casein kinase 1, delta                                                                    | 4 |
| CSNK2A1 | 1457   | Casein kinase 2, alpha 1 polypeptide                                                      | 3 |
| CSNK2B  | 1460   | Casein kinase 2, beta polypeptide                                                         | 4 |
| CST5    | 1473   | Cystatin D                                                                                | 5 |
| CST6    | 1474   | Cystatin E/M                                                                              | 3 |
| CTDP1   | 9150   | CTD (carboxy-terminal domain, RNA polymerase II, polypeptide A) phosphatase, subunit      | 4 |
| CTNNB1  | 1499   | Catenin (cadherin-associated protein), beta 1, 88kDa                                      | 4 |
| CTRL    | 1506   | Chymotrypsin-like                                                                         | 5 |
| CTSB    | 1508   | Cathepsin B                                                                               | 5 |
| CTSC    | 1075   | Cathepsin C                                                                               | 5 |
| CTSD    | 1509   | Cathepsin D                                                                               | 5 |
| CTSE    | 1510   | Cathepsin E                                                                               | 4 |
| CTSG    | 1511   | Cathepsin G                                                                               | 5 |
| CTSH    | 1512   | Cathepsin H                                                                               | 4 |
| CTSK    | 1513   | Cathepsin K                                                                               | 5 |
| CTSL    | 1514   | cathepsin L                                                                               | 5 |
| CTSL2   | 1515   | Cathepsin L2                                                                              | 4 |
| CTSS    | 1520   | Cathepsin S                                                                               | 5 |
| CTSW    | 1521   | Cathepsin W                                                                               | 5 |
| CTSZ    | 1522   | Cathepsin Z                                                                               | 4 |
| CUEDC1  | 404093 | CUE domain containing 1                                                                   | 5 |
| CUL1    | 8454   | Cullin 1                                                                                  | 4 |
| CXCL12  | 6387   | Chemokine (C-X-C motif) ligand 12 (stromal cell-derived factor 1)                         | 5 |
| CXCR4   | 7852   | Chemokine (C-X-C motif) receptor 4                                                        | 5 |
| DAB2IP  | 153090 | DAB2 interacting protein                                                                  | 5 |

|         |        |                                                                             |   |
|---------|--------|-----------------------------------------------------------------------------|---|
| DAPK2   | 23604  | Death-associated protein kinase 2                                           | 5 |
| DAPP1   | 27071  | Dual adaptor of phosphotyrosine and 3-phosphoinositides                     | 5 |
| DARC    | 2532   | Duffy blood group, chemokine receptor                                       | 5 |
| DAXX    | 1616   | Death-associated protein 6                                                  | 5 |
| DCAMKL1 | 9201   | doublecortin and CaM kinase-li                                              | 5 |
| DCAMKL2 | 166614 | hypothetical protein MGC45428                                               | 5 |
| DDR2    | 4921   | Discoidin domain receptor family, member 2                                  | 5 |
| DDX20   | 11218  | DEAD (Asp-Glu-Ala-Asp) box polypeptide 20                                   | 5 |
| DDX41   | 51428  | DEAD (Asp-Glu-Ala-Asp) box polypeptide 41                                   | 5 |
| DDX46   | 9879   | DEAD (Asp-Glu-Ala-Asp) box polypeptide 46                                   | 5 |
| DDX5    | 1655   | DEAD (Asp-Glu-Ala-Asp) box polypeptide 5                                    | 5 |
| DFFA    | 1676   | DNA fragmentation factor, 45kDa, alpha polypeptide                          | 4 |
| DFFB    | 1677   | DNA fragmentation factor, 40kDa, beta polypeptide (caspase-activated DNase) | 4 |
| DGKH    | 160851 | Diacylglycerol kinase, eta                                                  | 5 |
| DHRS4L2 | 317749 | Dehydrogenase/reductase (SDR family) member 4 like 2                        | 5 |
| DHRSX   | 207063 | Dehydrogenase/reductase (SDR family) X-linked                               | 5 |
| DHX16   | 8449   | DEAH (Asp-Glu-Ala-His) box polypeptide 16                                   | 5 |
| DHX35   | 60625  | DEAH (Asp-Glu-Ala-His) box polypeptide 35                                   | 5 |
| DHX38   | 9785   | DEAH (Asp-Glu-Ala-His) box polypeptide 38                                   | 5 |
| DHX9    | 1660   | DEAH (Asp-Glu-Ala-His) box polypeptide 9                                    | 5 |
| DIABLO  | 56616  | Diablo homolog (Drosophila)                                                 | 5 |
| DNAJC6  | 9829   | DnaJ (Hsp40) homolog, subfamily C, member 6                                 | 4 |
| DNM1L   | 10059  | Dynamin 1-like                                                              | 3 |
| DTX2    | 113878 | Deltex homolog 2 (Drosophila)                                               | 4 |
| DUSP1   | 1843   | Dual specificity phosphatase 1                                              | 5 |
| DUSP11  | 8446   | Dual specificity phosphatase 11 (RNA/RNP complex 1-interacting)             | 5 |
| DUSP13  | 51207  | Dual specificity phosphatase 13                                             | 5 |
| DUSP15  | 128853 | Dual specificity phosphatase 15                                             | 5 |
| DUSP18  | 150290 | Dual specificity phosphatase 18                                             | 5 |
| DUSP19  | 142679 | Dual specificity phosphatase 19                                             | 5 |
| DUSP26  | 78986  | Dual specificity phosphatase 26 (putative)                                  | 5 |
| DUSP5   | 1847   | Dual specificity phosphatase 5                                              | 4 |
| DUSP6   | 1848   | Dual specificity phosphatase 6                                              | 3 |
| DUSP7   | 1849   | Dual specificity phosphatase 7                                              | 3 |
| DUSP9   | 1852   | Dual specificity phosphatase 9                                              | 3 |
| DYRK1B  | 9149   | Dual-specificity tyrosine-(Y)-phosphorylation regulated kinase 1B           | 5 |
| EDD1    | 51366  | E3 identified by differential                                               | 5 |
| EDN1    | 1906   | Endothelin 1                                                                | 5 |

|         |        |                                                                                       |   |
|---------|--------|---------------------------------------------------------------------------------------|---|
| EGLN1   | 54583  | Egl nine homolog 1 ( <i>C. elegans</i> )                                              | 4 |
| EGLN3   | 112399 | Egl nine homolog 3 ( <i>C. elegans</i> )                                              | 5 |
| EIF2AK2 | 5610   | Eukaryotic translation initiation factor 2-alpha kinase 2                             | 5 |
| EIF2AK3 | 9451   | Eukaryotic translation initiation factor 2-alpha kinase 3                             | 5 |
| EIF2C1  | 26523  | Eukaryotic translation initiation factor 2C, 1                                        | 5 |
| EIF2C2  | 27161  | Eukaryotic translation initiation factor 2C, 2                                        | 4 |
| EIF2C3  | 192669 | Eukaryotic translation initiation factor 2C, 3                                        | 4 |
| EIF2C4  | 192670 | Eukaryotic translation initiation factor 2C, 4                                        | 4 |
| ELA1    | 1990   | Elastase 1, pancreatic                                                                | 4 |
| ELA2    | 1991   | Elastase 2, neutrophil                                                                | 4 |
| ELOVL2  | 54898  | Elongation of very long chain fatty acids (FEN1/Elo2, SUR4/Elo3, yeast)-like 2        | 5 |
| ELP3    | 55140  | Elongation protein 3 homolog ( <i>S. cerevisiae</i> )                                 | 5 |
| ELP4    | 26610  | Elongation protein 4 homolog ( <i>S. cerevisiae</i> )                                 | 5 |
| ELTD1   | 64123  | EGF, latrophilin and seven transmembrane domain containing 1                          | 5 |
| EMR3    | 84658  | Egf-like module containing, mucin-like, hormone receptor-like 3                       | 5 |
| ENPP1   | 5167   | Ectonucleotide pyrophosphatase/phosphodiesterase 1                                    | 5 |
| ENPP7   | 339221 | Ectonucleotide pyrophosphatase/phosphodiesterase 7                                    | 4 |
| EPAS1   | 2034   | Endothelial PAS domain protein 1                                                      | 5 |
| EPHA6   | 285220 | EPH receptor A6                                                                       | 5 |
| EPHA8   | 2046   | EPH receptor A8                                                                       | 5 |
| EPHB4   | 2050   | EPH receptor B4                                                                       | 4 |
| EPHB6   | 2051   | EPH receptor B6                                                                       | 3 |
| EPM2A   | 7957   | Epilepsy, progressive myoclonus type 2A, Lafora disease (laforin)                     | 5 |
| ERBB4   | 2066   | V-erb-a erythroblastic leukemia viral oncogene homolog 4 (avian)                      | 5 |
| ERCC8   | 1161   | Excision repair cross-complementing rodent repair deficiency, complementation group 8 | 5 |
| ESR1    | 2099   | Estrogen receptor 1                                                                   | 4 |
| ESR2    | 2100   | Estrogen receptor 2 (ER beta)                                                         | 4 |
| ETV6    | 2120   | Ets variant gene 6 (TEL oncogene)                                                     | 5 |
| EVI1    | 2122   | Ecotropic viral integration site 1                                                    | 5 |
| EZH1    | 2145   | Enhancer of zeste homolog 1 ( <i>Drosophila</i> )                                     | 4 |
| F2      | 2147   | Coagulation factor II (thrombin)                                                      | 5 |
| F2R     | 2149   | Coagulation factor II (thrombin) receptor                                             | 5 |
| F2RL3   | 9002   | Coagulation factor II (thrombin) receptor-like 3                                      | 3 |
| FAF1    | 11124  | Fas (TNFRSF6) associated factor 1                                                     | 5 |
| FAM62A  | 23344  | Family with sequence similarity 62 (C2 domain containing), member A                   | 5 |
| FASN    | 2194   | Fatty acid synthase                                                                   | 5 |
| FAU     | 2197   | Finkel-Biskis-Reilly murine sarcoma virus (FBR-MuSV) ubiquitously expressed           | 3 |
| FBXL2   | 25827  | F-box and leucine-rich repeat protein 2                                               | 5 |

|          |        |                                                               |   |
|----------|--------|---------------------------------------------------------------|---|
| FBXL21   | 26223  | F-box and leucine-rich repeat protein 21                      | 4 |
| FBXL3    | 26224  | F-box and leucine-rich repeat protein 3                       | 5 |
| FBXL5    | 26234  | F-box and leucine-rich repeat protein 5                       | 5 |
| FBXL6    | 26233  | F-box and leucine-rich repeat protein 6                       | 5 |
| FBXO11   | 80204  | F-box protein 11                                              | 5 |
| FBXO2    | 26232  | F-box protein 2                                               | 3 |
| FBXO22   | 26263  | F-box protein 22                                              | 4 |
| FBXO24   | 26261  | F-box protein 24                                              | 5 |
| FBXO25   | 26260  | F-box protein 25                                              | 5 |
| FBXO27   | 126433 | F-box protein 27                                              | 4 |
| FBXO3    | 26273  | F-box protein 3                                               | 5 |
| FBXO5    | 26271  | F-box protein 5                                               | 5 |
| FBXO6    | 26270  | F-box protein 6                                               | 4 |
| FBXO7    | 25793  | F-box protein 7                                               | 5 |
| FBXW11   | 23291  | F-box and WD repeat domain containing 11                      | 5 |
| FBXW4    | 6468   | F-box and WD repeat domain containing 4                       | 2 |
| FBXW5    | 54461  | F-box and WD repeat domain containing 5                       | 3 |
| FBXW8    | 26259  | F-box and WD repeat domain containing 8                       | 5 |
| FER      | 2241   | Fer (fps/fes related) tyrosine kinase (phosphoprotein NCP94)  | 5 |
| FGF2     | 2247   | Fibroblast growth factor 2 (basic)                            | 5 |
| FGR      | 2268   | Gardner-Rasheed feline sarcoma viral (v-fgr) oncogene homolog | 5 |
| FKBP8    | 23770  | FK506 binding protein 8, 38kDa                                | 4 |
| FLJ23356 | 84197  | Hypothetical protein FLJ23356                                 | 5 |
| FLJ25006 | 124923 | Hypothetical protein FLJ25006                                 | 4 |
| FLJ35834 | 154865 | hypothetical protein FLJ35834                                 | 4 |
| FLJ40125 | 147699 | Hypothetical protein FLJ40125                                 | 3 |
| FMNL1    | 752    | Formin-like 1                                                 | 5 |
| FPR1     | 2357   | Formyl peptide receptor 1                                     | 5 |
| FPRL1    | 2358   | Formyl peptide receptor-like 1                                | 5 |
| FPRL2    | 2359   | Formyl peptide receptor-like 2                                | 4 |
| FSHR     | 2492   | Follicle stimulating hormone receptor                         | 5 |
| FTS      | 64400  | fused toes homolog (mouse)                                    | 5 |
| FUS      | 2521   | Fusion (involved in t(12;16) in malignant liposarcoma)        | 4 |
| FXR2     | 9513   | Fragile X mental retardation, autosomal homolog 2             | 5 |
| FYN      | 2534   | FYN oncogene related to SRC, FGR, YES                         | 5 |
| FZD1     | 8321   | Frizzled homolog 1 (Drosophila)                               | 5 |
| FZD10    | 11211  | Frizzled homolog 10 (Drosophila)                              | 5 |
| FZD2     | 2535   | Frizzled homolog 2 (Drosophila)                               | 4 |

|          |        |                                                                           |   |
|----------|--------|---------------------------------------------------------------------------|---|
| FZD3     | 7976   | Frizzled homolog 3 (Drosophila)                                           | 5 |
| FZD4     | 8322   | Frizzled homolog 4 (Drosophila)                                           | 5 |
| FZD5     | 7855   | Frizzled homolog 5 (Drosophila)                                           | 4 |
| FZD6     | 8323   | Frizzled homolog 6 (Drosophila)                                           | 5 |
| FZD7     | 8324   | Frizzled homolog 7 (Drosophila)                                           | 5 |
| FZD8     | 8325   | Frizzled homolog 8 (Drosophila)                                           | 5 |
| FZD9     | 8326   | Frizzled homolog 9 (Drosophila)                                           | 5 |
| FZR1     | 51343  | Fizzy/cell division cycle 20 related 1 (Drosophila)                       | 2 |
| GABBR1   | 2550   | Gamma-aminobutyric acid (GABA) B receptor, 1                              | 5 |
| GAK      | 2580   | Cyclin G associated kinase                                                | 5 |
| GALR1    | 2587   | Galanin receptor 1                                                        | 5 |
| GALR2    | 8811   | Galanin receptor 2                                                        | 5 |
| GCGR     | 2642   | Glucagon receptor                                                         | 4 |
| GCM2     | 9247   | Glial cells missing homolog 2 (Drosophila)                                | 5 |
| GCNT2    | 2651   | Glucosaminyl (N-acetyl) transferase 2, I-branching enzyme (I blood group) | 5 |
| GEMIN4   | 50628  | Gem (nuclear organelle) associated protein 4                              | 5 |
| GHRHR    | 2692   | Growth hormone releasing hormone receptor                                 | 5 |
| GHSR     | 2693   | Growth hormone secretagogue receptor                                      | 5 |
| GIPR     | 2696   | Gastric inhibitory polypeptide receptor                                   | 5 |
| GIT1     | 28964  | G protein-coupled receptor kinase interactor 1                            | 4 |
| GIT2     | 9815   | G protein-coupled receptor kinase interactor 2                            | 5 |
| GMFB     | 2764   | Glia maturation factor, beta                                              | 5 |
| GMFG     | 9535   | Glia maturation factor, gamma                                             | 4 |
| GNLY     | 10578  | Granulysin                                                                | 5 |
| GPR109A  | 338442 | G protein-coupled receptor 109A                                           | 4 |
| GPR132   | 29933  | G protein-coupled receptor 132                                            | 4 |
| GPR155   | 151556 | G protein-coupled receptor 155                                            | 4 |
| GPR156   | 165829 | G protein-coupled receptor 156                                            | 5 |
| GPR157   | 80045  | G protein-coupled receptor 157                                            | 4 |
| GPR172A  | 79581  | G protein-coupled receptor 172A                                           | 4 |
| GPR172B  | 55065  | G protein-coupled receptor 172B                                           | 5 |
| GPR174   | 84636  | G protein-coupled receptor 174                                            | 5 |
| GPR37L1  | 9283   | G protein-coupled receptor 37 like 1                                      | 5 |
| GRK1     | 6011   | G protein-coupled receptor kinase 1                                       | 4 |
| GRK6     | 2870   | G protein-coupled receptor kinase 6                                       | 3 |
| GRK7     | 131890 | G protein-coupled receptor kinase 7                                       | 4 |
| GSC      | 145258 | Goosecoid homeobox                                                        | 5 |
| GTF2IRD1 | 9569   | GTF2I repeat domain containing 1                                          | 4 |

|          |        |                                                                                          |    |
|----------|--------|------------------------------------------------------------------------------------------|----|
| GUCY2C   | 2984   | Guanylate cyclase 2C (heat stable enterotoxin receptor)                                  | 5  |
| HACE1    | 57531  | HECT domain and ankyrin repeat containing, E3 ubiquitin protein ligase 1                 | 5  |
| HADH     | 3033   | Hydroxyacyl-Coenzyme A dehydrogenase                                                     | 5  |
| HADHB    | 3032   | Hydroxyacyl-Coenzyme A dehydrogenase/3-ketoacyl-Coenzyme A thiolase/enoyl-Coenzym        | 5  |
| HECTD1   | 25831  | HECT domain containing 1                                                                 | 5  |
| HECTD2   | 143279 | HECT domain containing 2                                                                 | 5  |
| HECW1    | 23072  | HECT, C2 and WW domain containing E3 ubiquitin protein ligase 1                          | 2  |
| HERC5    | 51191  | Hect domain and RLD 5                                                                    | 4  |
| HERPUD1  | 9709   | Homocysteine-inducible, endoplasmic reticulum stress-inducible, ubiquitin-like domain me | 4  |
| HERPUD2  | 64224  | HERPUD family member 2                                                                   | 5  |
| HGF      | 3082   | Hepatocyte growth factor (hepapoietin A; scatter factor)                                 | 10 |
| HIF1A    | 3091   | Hypoxia-inducible factor 1, alpha subunit (basic helix-loop-helix transcription factor)  | 4  |
| HIF3A    | 64344  | Hypoxia inducible factor 3, alpha subunit                                                | 4  |
| HIPK1    | 204851 | Homeodomain interacting protein kinase 1                                                 | 5  |
| HIPK2    | 28996  | Homeodomain interacting protein kinase 2                                                 | 4  |
| HIPK3    | 10114  | Homeodomain interacting protein kinase 3                                                 | 5  |
| HNRPA2B1 | 3181   | heterogeneous nuclear ribonucleoprotein                                                  | 4  |
| HNRPA3P1 | 10151  | Heterogeneous nuclear ribonucleoprotein A3 pseudogene 1                                  | 4  |
| HNRPD    | 3184   | Heterogeneous nuclear ribonucleoprotein D (AU-rich element RNA binding protein 1, 37kD   | 5  |
| HNRPF    | 3185   | Heterogeneous nuclear ribonucleoprotein F                                                | 5  |
| HNRPM    | 4670   | Heterogeneous nuclear ribonucleoprotein M                                                | 5  |
| HNRPR    | 10236  | heterogeneous nuclear ribonucleoprotein                                                  | 5  |
| HNRPU    | 3192   | heterogeneous nuclear ribonucleoprotein                                                  | 5  |
| HRASLS   | 57110  | HRAS-like suppressor                                                                     | 4  |
| HSD11B1  | 3290   | Hydroxysteroid (11-beta) dehydrogenase 1                                                 | 4  |
| HSD11B2  | 3291   | Hydroxysteroid (11-beta) dehydrogenase 2                                                 | 5  |
| HSD17B1  | 3292   | Hydroxysteroid (17-beta) dehydrogenase 1                                                 | 4  |
| HSD17B13 | 345275 | short-chain dehydrogenase/redu                                                           | 5  |
| HSP90AA1 | 3320   | Heat shock protein 90kDa alpha (cytosolic), class A member 1                             | 4  |
| HSPA5    | 3309   | Heat shock 70kDa protein 5 (glucose-regulated protein, 78kDa)                            | 3  |
| HSPB2    | 3316   | Heat shock 27kDa protein 2                                                               | 4  |
| HUNK     | 30811  | Hormonally upregulated Neu-associated kinase                                             | 5  |
| IHPK1    | 9807   | Inositol hexaphosphate kinase 1                                                          | 5  |
| ILKAP    | 80895  | Integrin-linked kinase-associated serine/threonine phosphatase 2C                        | 5  |
| ILVBL    | 10994  | IlvB (bacterial acetolactate synthase)-like                                              | 4  |
| IMPACT   | 55364  | Impact homolog (mouse)                                                                   | 5  |
| INPP4A   | 3631   | Inositol polyphosphate-4-phosphatase, type I, 107kDa                                     | 5  |
| INSRR    | 3645   | Insulin receptor-related receptor                                                        | 4  |

|           |        |                                                                           |   |
|-----------|--------|---------------------------------------------------------------------------|---|
| INTS6     | 26512  | Integrator complex subunit 6                                              | 5 |
| IRAK4     | 51135  | Interleukin-1 receptor-associated kinase 4                                | 4 |
| ITCH      | 83737  | Itchy homolog E3 ubiquitin protein ligase (mouse)                         | 4 |
| ITGAV     | 3685   | Integrin, alpha V (vitronectin receptor, alpha polypeptide, antigen CD51) | 3 |
| ITGB3     | 3690   | Integrin, beta 3 (platelet glycoprotein IIIa, antigen CD61)               | 5 |
| ITSN1     | 6453   | Intersectin 1 (SH3 domain protein)                                        | 4 |
| ITSN2     | 50618  | Intersectin 2                                                             | 5 |
| JAK1      | 3716   | Janus kinase 1 (a protein tyrosine kinase)                                | 4 |
| JAK2      | 3717   | Janus kinase 2 (a protein tyrosine kinase)                                | 5 |
| JMJD2A    | 9682   | Jumonji domain containing 2A                                              | 5 |
| KALRN     | 8997   | Kalirin, RhoGEF kinase                                                    | 5 |
| KDR       | 3791   | Kinase insert domain receptor (a type III receptor tyrosine kinase)       | 5 |
| KIAA0317  | 9870   | KIAA0317                                                                  | 4 |
| KIAA1333  | 55632  | KIAA1333                                                                  | 5 |
| KIAA1706  | 80820  | KIAA1706 protein                                                          | 4 |
| KIAA1804  | 84451  | Mixed lineage kinase 4                                                    | 5 |
| Kua-UEV   | 387522 | ubiquitin-conjugating enzyme E                                            | 5 |
| LATS1     | 9113   | LATS, large tumor suppressor, homolog 1 (Drosophila)                      | 5 |
| LCK       | 3932   | Lymphocyte-specific protein tyrosine kinase                               | 5 |
| LITAF     | 9516   | Lipopolysaccharide-induced TNF factor                                     | 3 |
| LNX2      | 222484 | Ligand of numb-protein X 2                                                | 4 |
| LOC220729 | 220729 | Succinate dehydrogenase complex, subunit A, flavoprotein pseudogene       | 5 |
| LOC221711 | 221711 | hypothetical protein LOC221711                                            | 5 |
| LOC346085 | 346085 | Hypothetical LOC346085                                                    | 5 |
| LOC51035  | 51035  | SAPK substrate protein 1                                                  | 4 |
| LONRF2    | 164832 | LON peptidase N-terminal domain and ring finger 2                         | 5 |
| LTK       | 4058   | Leukocyte tyrosine kinase                                                 | 4 |
| LUC7L     | 55692  | LUC7-like (S. cerevisiae)                                                 | 5 |
| LUC7L2    | 51631  | LUC7-like 2 (S. cerevisiae)                                               | 5 |
| MAGED1    | 9500   | Melanoma antigen family D, 1                                              | 5 |
| MAK       | 4117   | Male germ cell-associated kinase                                          | 5 |
| MAML1     | 9794   | Mastermind-like 1 (Drosophila)                                            | 5 |
| MAP2K1    | 5604   | Mitogen-activated protein kinase kinase 1                                 | 5 |
| MAP2K4    | 6416   | Mitogen-activated protein kinase kinase 4                                 | 5 |
| MAP2K5    | 5607   | Mitogen-activated protein kinase kinase 5                                 | 5 |
| MAP2K7    | 5609   | Mitogen-activated protein kinase kinase 7                                 | 2 |
| MAP3K10   | 4294   | Mitogen-activated protein kinase kinase kinase 10                         | 4 |
| MAP3K2    | 10746  | Mitogen-activated protein kinase kinase kinase 2                          | 5 |

|           |        |                                                                         |   |
|-----------|--------|-------------------------------------------------------------------------|---|
| MAP3K3    | 4215   | Mitogen-activated protein kinase kinase kinase 3                        | 4 |
| MAP3K6    | 9064   | Mitogen-activated protein kinase kinase kinase 6                        | 5 |
| MAP3K7    | 6885   | Mitogen-activated protein kinase kinase kinase 7                        | 5 |
| MAP3K7IP2 | 23118  | Mitogen-activated protein kinase kinase kinase 7 interacting protein 2  | 5 |
| MAP4K1    | 11184  | Mitogen-activated protein kinase kinase kinase kinase 1                 | 5 |
| MAP4K2    | 5871   | Mitogen-activated protein kinase kinase kinase kinase 2                 | 5 |
| MAP4K5    | 11183  | Mitogen-activated protein kinase kinase kinase kinase 5                 | 5 |
| MAPK10    | 5602   | Mitogen-activated protein kinase 10                                     | 5 |
| MAPK15    | 225689 | Mitogen-activated protein kinase 15                                     | 3 |
| MAPK4     | 5596   | Mitogen-activated protein kinase 4                                      | 5 |
| MAPK6     | 5597   | Mitogen-activated protein kinase 6                                      | 4 |
| MAPK7     | 5598   | Mitogen-activated protein kinase 7                                      | 3 |
| MAPK8     | 5599   | Mitogen-activated protein kinase 8                                      | 3 |
| MAPK8IP1  | 9479   | Mitogen-activated protein kinase 8 interacting protein 1                | 4 |
| MAPK9     | 5601   | Mitogen-activated protein kinase 9                                      | 5 |
| MAPKAP1   | 79109  | Mitogen-activated protein kinase associated protein 1                   | 4 |
| MAPKAPK2  | 9261   | Mitogen-activated protein kinase-activated protein kinase 2             | 5 |
| MARK2     | 2011   | MAP/microtubule affinity-regulating kinase 2                            | 5 |
| MARK3     | 4140   | MAP/microtubule affinity-regulating kinase 3                            | 4 |
| MARK4     | 57787  | MAP/microtubule affinity-regulating kinase 4                            | 5 |
| MAST2     | 23139  | Microtubule associated serine/threonine kinase 2                        | 4 |
| MASTL     | 84930  | Microtubule associated serine/threonine kinase-like                     | 5 |
| MATK      | 4145   | Megakaryocyte-associated tyrosine kinase                                | 5 |
| MBIP      | 51562  | MAP3K12 binding inhibitory protein 1                                    | 5 |
| MCTP1     | 79772  | Multiple C2 domains, transmembrane 1                                    | 5 |
| MDM2      | 4193   | Mdm2, transformed 3T3 cell double minute 2, p53 binding protein (mouse) | 5 |
| MDM4      | 4194   | Mdm4, transformed 3T3 cell double minute 4, p53 binding protein (mouse) | 4 |
| MELK      | 9833   | Maternal embryonic leucine zipper kinase                                | 5 |
| MGC42638  | 340561 | hypothetical protein MGC42638                                           | 4 |
| MIB1      | 57534  | Mindbomb homolog 1 (Drosophila)                                         | 5 |
| MKRN2     | 23609  | Makorin, ring finger protein, 2                                         | 5 |
| MLKL      | 197259 | Mixed lineage kinase domain-like                                        | 5 |
| MMP1      | 4312   | Matrix metalloproteinase 1 (interstitial collagenase)                   | 5 |
| MMP3      | 4314   | Matrix metalloproteinase 3 (stromelysin 1, progelatinase)               | 4 |
| MORC1     | 27136  | MORC family CW-type zinc finger 1                                       | 5 |
| MORC3     | 23515  | MORC family CW-type zinc finger 3                                       | 5 |
| MOS       | 4342   | V-mos Moloney murine sarcoma viral oncogene homolog                     | 3 |
| MST1R     | 4486   | Macrophage stimulating 1 receptor (c-met-related tyrosine kinase)       | 5 |



|        |        |                                                                                          |   |
|--------|--------|------------------------------------------------------------------------------------------|---|
| MTM1   | 4534   | Myotubularin 1                                                                           | 4 |
| MTMR1  | 8776   | Myotubularin related protein 1                                                           | 5 |
| MTMR2  | 8898   | Myotubularin related protein 2                                                           | 5 |
| MTMR3  | 8897   | Myotubularin related protein 3                                                           | 5 |
| MTMR4  | 9110   | Myotubularin related protein 4                                                           | 5 |
| MTMR8  | 55613  | Myotubularin related protein 8                                                           | 5 |
| MUSK   | 4593   | Muscle, skeletal, receptor tyrosine kinase                                               | 4 |
| MYD88  | 4615   | Myeloid differentiation primary response gene (88)                                       | 4 |
| MYO3A  | 53904  | Myosin IIIA                                                                              | 5 |
| MYO3B  | 140469 | Myosin IIIB                                                                              | 5 |
| NANOG  | 79923  | Nanog homeobox                                                                           | 5 |
| NCOA1  | 8648   | Nuclear receptor coactivator 1                                                           | 5 |
| NEIL3  | 55247  | Nei endonuclease VIII-like 3 (E. coli)                                                   | 5 |
| NEK10  | 152110 | NIMA (never in mitosis gene a)- related kinase 10                                        | 5 |
| NEK11  | 79858  | NIMA (never in mitosis gene a)- related kinase 11                                        | 5 |
| NEK3   | 4752   | NIMA (never in mitosis gene a)-related kinase 3                                          | 5 |
| NEK4   | 6787   | NIMA (never in mitosis gene a)-related kinase 4                                          | 5 |
| NEK6   | 10783  | NIMA (never in mitosis gene a)-related kinase 6                                          | 5 |
| NEK7   | 140609 | NIMA (never in mitosis gene a)-related kinase 7                                          | 4 |
| NFE2L3 | 9603   | Nuclear factor (erythroid-derived 2)-like 3                                              | 5 |
| NFKBIA | 4792   | Nuclear factor of kappa light polypeptide gene enhancer in B-cells inhibitor, alpha      | 4 |
| NLK    | 51701  | Nemo-like kinase                                                                         | 5 |
| NOS2A  | 4843   | Nitric oxide synthase 2A (inducible, hepatocytes)                                        | 5 |
| NOTCH1 | 4851   | Notch homolog 1, translocation-associated (Drosophila)                                   | 5 |
| NOTCH2 | 4853   | Notch homolog 2 (Drosophila)                                                             | 5 |
| NOVA1  | 4857   | Neuro-oncological ventral antigen 1                                                      | 4 |
| NPR2   | 4882   | Natriuretic peptide receptor B/guanylate cyclase B (atrionatriuretic peptide receptor B) | 4 |
| NQO1   | 1728   | NAD(P)H dehydrogenase, quinone 1                                                         | 5 |
| NRBP1  | 29959  | Nuclear receptor binding protein 1                                                       | 5 |
| NTRK1  | 4914   | Neurotrophic tyrosine kinase, receptor, type 1                                           | 5 |
| NTRK2  | 4915   | Neurotrophic tyrosine kinase, receptor, type 2                                           | 5 |
| NTRK3  | 4916   | Neurotrophic tyrosine kinase, receptor, type 3                                           | 5 |
| NUAK2  | 81788  | NUAK family, SNF1-like kinase, 2                                                         | 4 |
| NUB1   | 51667  | Negative regulator of ubiquitin-like proteins 1                                          | 4 |
| NUMB   | 8650   | Numb homolog (Drosophila)                                                                | 5 |
| NUPL1  | 9818   | Nucleoporin like 1                                                                       | 5 |
| NXF1   | 10482  | Nuclear RNA export factor 1                                                              | 4 |
| OASL   | 8638   | 2'-5'-oligoadenylate synthetase-like                                                     | 5 |

|         |        |                                                                 |   |
|---------|--------|-----------------------------------------------------------------|---|
| OGG1    | 4968   | 8-oxoguanine DNA glycosylase                                    | 5 |
| ONECUT2 | 9480   | One cut homeobox 2                                              | 4 |
| OR7E5P  | 219445 | Olfactory receptor, family 7, subfamily E, member 5 pseudogene  | 3 |
| OTUB1   | 55611  | OTU domain, ubiquitin aldehyde binding 1                        | 5 |
| OTUD7B  | 56957  | OTU domain containing 7B                                        | 5 |
| OCSR1   | 9943   | Oxidative-stress responsive 1                                   | 4 |
| P15RS   | 55197  | Hypothetical protein FLJ10656                                   | 5 |
| PAK1    | 5058   | P21/Cdc42/Rac1-activated kinase 1 (STE20 homolog, yeast)        | 4 |
| PAK1IP1 | 55003  | PAK1 interacting protein 1                                      | 5 |
| PAK2    | 5062   | P21 (CDKN1A)-activated kinase 2                                 | 5 |
| PAK3    | 5063   | P21 (CDKN1A)-activated kinase 3                                 | 5 |
| PAK6    | 56924  | P21(CDKN1A)-activated kinase 6                                  | 5 |
| PARC    | 23113  | P53-associated parkin-like cytoplasmic protein                  | 5 |
| PARK7   | 11315  | Parkinson disease (autosomal recessive, early onset) 7          | 5 |
| PARP11  | 57097  | Poly (ADP-ribose) polymerase family, member 11                  | 4 |
| PARP12  | 64761  | Poly (ADP-ribose) polymerase family, member 12                  | 5 |
| PBK     | 55872  | PDZ binding kinase                                              | 5 |
| PCNA    | 5111   | Proliferating cell nuclear antigen                              | 4 |
| PDGFRA  | 5156   | Platelet-derived growth factor receptor, alpha polypeptide      | 5 |
| PDGFRB  | 5159   | Platelet-derived growth factor receptor, beta polypeptide       | 5 |
| PDIK1L  | 149420 | PDLIM1 interacting kinase 1 like                                | 5 |
| PDK2    | 5164   | Pyruvate dehydrogenase kinase, isozyme 2                        | 5 |
| PDPK1   | 5170   | 3-phosphoinositide dependent protein kinase-1                   | 5 |
| PFTK1   | 5218   | PFTAIRE protein kinase 1                                        | 5 |
| PGR     | 5241   | Progesterone receptor                                           | 4 |
| PHGDHL1 | 337867 | phosphoglycerate dehydrogenase                                  | 5 |
| PIAS1   | 8554   | Protein inhibitor of activated STAT, 1                          | 4 |
| PIAS4   | 51588  | Protein inhibitor of activated STAT, 4                          | 5 |
| PIK3C2A | 5286   | Phosphoinositide-3-kinase, class 2, alpha polypeptide           | 5 |
| PIK3C2B | 5287   | Phosphoinositide-3-kinase, class 2, beta polypeptide            | 5 |
| PIK3C2G | 5288   | Phosphoinositide-3-kinase, class 2, gamma polypeptide           | 5 |
| PIM2    | 11040  | Pim-2 oncogene                                                  | 5 |
| PIN1    | 5300   | Protein (peptidylprolyl cis/trans isomerase) NIMA-interacting 1 | 4 |
| PIWIL1  | 9271   | Piwi-like 1 (Drosophila)                                        | 5 |
| PIWIL2  | 55124  | Piwi-like 2 (Drosophila)                                        | 5 |
| PJA1    | 64219  | Praja 1                                                         | 4 |
| PJA2    | 9867   | Praja 2, RING-H2 motif containing                               | 5 |
| PKIA    | 5569   | Protein kinase (cAMP-dependent, catalytic) inhibitor alpha      | 5 |

|          |        |                                                                                                         |   |
|----------|--------|---------------------------------------------------------------------------------------------------------|---|
| PKIB     | 5570   | Protein kinase (cAMP-dependent, catalytic) inhibitor beta                                               | 5 |
| PKN1     | 5585   | Protein kinase N1                                                                                       | 5 |
| PKN3     | 29941  | Protein kinase N3                                                                                       | 4 |
| PLCB2    | 5330   | Phospholipase C, beta 2                                                                                 | 5 |
| PLCD1    | 5333   | Phospholipase C, delta 1                                                                                | 4 |
| PLCG2    | 5336   | Phospholipase C, gamma 2 (phosphatidylinositol-specific)                                                | 5 |
| PLCL1    | 5334   | Phospholipase C-like 1                                                                                  | 4 |
| PLCL2    | 23228  | Phospholipase C-like 2                                                                                  | 5 |
| PLCZ1    | 89869  | Phospholipase C, zeta 1                                                                                 | 5 |
| PLD1     | 5337   | Phospholipase D1, phosphatidylcholine-specific                                                          | 3 |
| PLK4     | 10733  | Polo-like kinase 4 (Drosophila)                                                                         | 5 |
| PML      | 5371   | Promyelocytic leukemia                                                                                  | 5 |
| POU5F1   | 5460   | POU class 5 homeobox 1                                                                                  | 5 |
| PPAP2A   | 8611   | Phosphatidic acid phosphatase type 2A                                                                   | 4 |
| PPAP2C   | 8612   | Phosphatidic acid phosphatase type 2C                                                                   | 5 |
| PPARA    | 5465   | Peroxisome proliferator-activated receptor alpha                                                        | 5 |
| PPARD    | 5467   | Peroxisome proliferator-activated receptor delta                                                        | 4 |
| PPARG    | 5468   | Peroxisome proliferator-activated receptor gamma                                                        | 5 |
| PPARGC1A | 10891  | Peroxisome proliferator-activated receptor gamma, coactivator 1 alpha                                   | 5 |
| PPEF1    | 5475   | Protein phosphatase, EF-hand calcium binding domain 1                                                   | 5 |
| PPEF2    | 5470   | Protein phosphatase, EF-hand calcium binding domain 2                                                   | 5 |
| PPFIA1   | 8500   | Protein tyrosine phosphatase, receptor type, f polypeptide (PTPRF), interacting protein (liprin beta 1) | 5 |
| PPFIA2   | 8499   | Protein tyrosine phosphatase, receptor type, f polypeptide (PTPRF), interacting protein (liprin beta 1) | 5 |
| PPFIA3   | 8541   | Protein tyrosine phosphatase, receptor type, f polypeptide (PTPRF), interacting protein (liprin beta 1) | 5 |
| PPFIBP1  | 8496   | PTPRF interacting protein, binding protein 1 (liprin beta 1)                                            | 5 |
| PPM1A    | 5494   | Protein phosphatase 1A (formerly 2C), magnesium-dependent, alpha isoform                                | 5 |
| PPM1B    | 5495   | Protein phosphatase 1B (formerly 2C), magnesium-dependent, beta isoform                                 | 4 |
| PPM1D    | 8493   | Protein phosphatase 1D magnesium-dependent, delta isoform                                               | 5 |
| PPM1E    | 22843  | Protein phosphatase 1E (PP2C domain containing)                                                         | 5 |
| PPM1F    | 9647   | Protein phosphatase 1F (PP2C domain containing)                                                         | 3 |
| PPM1G    | 5496   | Protein phosphatase 1G (formerly 2C), magnesium-dependent, gamma isoform                                | 5 |
| PPM1K    | 152926 | Protein phosphatase 1K (PP2C domain containing)                                                         | 5 |
| PPM1L    | 151742 | Protein phosphatase 1 (formerly 2C)-like                                                                | 5 |
| PPM1M    | 132160 | Protein phosphatase 1M (PP2C domain containing)                                                         | 4 |
| PPM2C    | 54704  | Protein phosphatase 2C, magnesium-dependent, catalytic subunit                                          | 5 |
| PPME1    | 51400  | Protein phosphatase methylesterase 1                                                                    | 4 |
| PPP1CA   | 5499   | Protein phosphatase 1, catalytic subunit, alpha isoform                                                 | 5 |
| PPP1CB   | 5500   | Protein phosphatase 1, catalytic subunit, beta isoform                                                  | 5 |

|          |        |                                                                           |   |
|----------|--------|---------------------------------------------------------------------------|---|
| PPP1CC   | 5501   | Protein phosphatase 1, catalytic subunit, gamma isoform                   | 5 |
| PPP1R10  | 5514   | Protein phosphatase 1, regulatory (inhibitor) subunit 10                  | 5 |
| PPP1R11  | 6992   | Protein phosphatase 1, regulatory (inhibitor) subunit 11                  | 4 |
| PPP1R12A | 4659   | Protein phosphatase 1, regulatory (inhibitor) subunit 12A                 | 5 |
| PPP1R12C | 54776  | Protein phosphatase 1, regulatory (inhibitor) subunit 12C                 | 3 |
| PPP1R13B | 23368  | Protein phosphatase 1, regulatory (inhibitor) subunit 13B                 | 5 |
| PPP1R14C | 81706  | Protein phosphatase 1, regulatory (inhibitor) subunit 14C                 | 5 |
| PPP1R14D | 54866  | Protein phosphatase 1, regulatory (inhibitor) subunit 14D                 | 4 |
| PPP1R15A | 23645  | Protein phosphatase 1, regulatory (inhibitor) subunit 15A                 | 5 |
| PPP1R15B | 84919  | Protein phosphatase 1, regulatory (inhibitor) subunit 15B                 | 5 |
| PPP1R16A | 84988  | Protein phosphatase 1, regulatory (inhibitor) subunit 16A                 | 4 |
| PPP1R1A  | 5502   | Protein phosphatase 1, regulatory (inhibitor) subunit 1A                  | 5 |
| PPP1R2P9 | 80316  | Protein phosphatase 1, regulatory (inhibitor) subunit 2 pseudogene 9      | 5 |
| PPP1R3B  | 79660  | Protein phosphatase 1, regulatory (inhibitor) subunit 3B                  | 5 |
| PPP1R3C  | 5507   | Protein phosphatase 1, regulatory (inhibitor) subunit 3C                  | 4 |
| PPP1R7   | 5510   | Protein phosphatase 1, regulatory (inhibitor) subunit 7                   | 5 |
| PPP1R8   | 5511   | Protein phosphatase 1, regulatory (inhibitor) subunit 8                   | 5 |
| PPP1R9B  | 84687  | Protein phosphatase 1, regulatory (inhibitor) subunit 9B                  | 3 |
| PPP2CA   | 5515   | Protein phosphatase 2 (formerly 2A), catalytic subunit, alpha isoform     | 5 |
| PPP2CB   | 5516   | Protein phosphatase 2 (formerly 2A), catalytic subunit, beta isoform      | 5 |
| PPP2R1A  | 5518   | Protein phosphatase 2 (formerly 2A), regulatory subunit A , alpha isoform | 2 |
| PPP2R1B  | 5519   | Protein phosphatase 2 (formerly 2A), regulatory subunit A, beta isoform   | 2 |
| PPP2R2A  | 5520   | Protein phosphatase 2 (formerly 2A), regulatory subunit B, alpha isoform  | 5 |
| PPP2R4   | 5524   | Protein phosphatase 2A activator, regulatory subunit 4                    | 4 |
| PPP2R5C  | 5527   | Protein phosphatase 2, regulatory subunit B', gamma isoform               | 5 |
| PPP2R5D  | 5528   | Protein phosphatase 2, regulatory subunit B', delta isoform               | 4 |
| PPP2R5E  | 5529   | Protein phosphatase 2, regulatory subunit B', epsilon isoform             | 5 |
| PPP3CA   | 5530   | Protein phosphatase 3 (formerly 2B), catalytic subunit, alpha isoform     | 5 |
| PPP3CB   | 5532   | Protein phosphatase 3 (formerly 2B), catalytic subunit, beta isoform      | 5 |
| PPP3R1   | 5534   | Protein phosphatase 3 (formerly 2B), regulatory subunit B, alpha isoform  | 5 |
| PPP4C    | 5531   | Protein phosphatase 4 (formerly X), catalytic subunit                     | 4 |
| PPP5C    | 5536   | Protein phosphatase 5, catalytic subunit                                  | 5 |
| PPP6C    | 5537   | Protein phosphatase 6, catalytic subunit                                  | 5 |
| PPTC7    | 160760 | PTC7 protein phosphatase homolog (S. cerevisiae)                          | 5 |
| PRKAA2   | 5563   | Protein kinase, AMP-activated, alpha 2 catalytic subunit                  | 5 |
| PRKAB2   | 5565   | Protein kinase, AMP-activated, beta 2 non-catalytic subunit               | 5 |
| PRKACA   | 5566   | Protein kinase, cAMP-dependent, catalytic, alpha                          | 4 |
| PRKACB   | 5567   | Protein kinase, cAMP-dependent, catalytic, beta                           | 5 |

|         |       |                                                                                           |   |
|---------|-------|-------------------------------------------------------------------------------------------|---|
| PRKAG1  | 5571  | Protein kinase, AMP-activated, gamma 1 non-catalytic subunit                              | 5 |
| PRKAG2  | 51422 | Protein kinase, AMP-activated, gamma 2 non-catalytic subunit                              | 5 |
| PRKCA   | 5578  | Protein kinase C, alpha                                                                   | 5 |
| PRKCB1  | 5579  | Protein kinase C, beta 1                                                                  | 4 |
| PRKCG   | 5582  | Protein kinase C, gamma                                                                   | 4 |
| PRKCQ   | 5588  | Protein kinase C, theta                                                                   | 5 |
| PRKCZ   | 5590  | Protein kinase C, zeta                                                                    | 5 |
| PRKD1   | 5587  | Protein kinase D1                                                                         | 5 |
| PRKD2   | 25865 | Protein kinase D2                                                                         | 4 |
| PRKD3   | 23683 | Protein kinase D3                                                                         | 5 |
| PRKG2   | 5593  | Protein kinase, cGMP-dependent, type II                                                   | 5 |
| PRKX    | 5613  | Protein kinase, X-linked                                                                  | 4 |
| PRPF31  | 26121 | PRP31 pre-mRNA processing factor 31 homolog ( <i>S. cerevisiae</i> )                      | 5 |
| PRSS7   | 5651  | Protease, serine, 7 (enterokinase)                                                        | 5 |
| PSKH1   | 5681  | Protein serine kinase H1                                                                  | 5 |
| PSKH2   | 85481 | Protein serine kinase H2                                                                  | 5 |
| PSMA1   | 5682  | Proteasome (prosome, macropain) subunit, alpha type, 1                                    | 5 |
| PSMA2   | 5683  | Proteasome (prosome, macropain) subunit, alpha type, 2                                    | 5 |
| PSMA3   | 5684  | Proteasome (prosome, macropain) subunit, alpha type, 3                                    | 4 |
| PSMA4   | 5685  | Proteasome (prosome, macropain) subunit, alpha type, 4                                    | 5 |
| PSMA5   | 5686  | Proteasome (prosome, macropain) subunit, alpha type, 5                                    | 5 |
| PSMA7   | 5688  | Proteasome (prosome, macropain) subunit, alpha type, 7                                    | 4 |
| PSMB1   | 5689  | Proteasome (prosome, macropain) subunit, beta type, 1                                     | 5 |
| PSMB10  | 5699  | Proteasome (prosome, macropain) subunit, beta type, 10                                    | 3 |
| PSMB2   | 5690  | Proteasome (prosome, macropain) subunit, beta type, 2                                     | 5 |
| PSMB3   | 5691  | Proteasome (prosome, macropain) subunit, beta type, 3                                     | 4 |
| PSMB4   | 5692  | Proteasome (prosome, macropain) subunit, beta type, 4                                     | 4 |
| PSMB5   | 5693  | Proteasome (prosome, macropain) subunit, beta type, 5                                     | 5 |
| PSMB6   | 5694  | Proteasome (prosome, macropain) subunit, beta type, 6                                     | 5 |
| PSMB7   | 5695  | Proteasome (prosome, macropain) subunit, beta type, 7                                     | 4 |
| PSMB9   | 5698  | Proteasome (prosome, macropain) subunit, beta type, 9 (large multifunctional peptidase 2) | 5 |
| PSMC2   | 5701  | Proteasome (prosome, macropain) 26S subunit, ATPase, 2                                    | 5 |
| PSMD11  | 5717  | Proteasome (prosome, macropain) 26S subunit, non-ATPase, 11                               | 5 |
| PSMD4   | 5710  | Proteasome (prosome, macropain) 26S subunit, non-ATPase, 4                                | 3 |
| PSMD9   | 5715  | proteasome (prosome, macropain)                                                           | 5 |
| PSPH    | 5723  | Phosphoserine phosphatase                                                                 | 5 |
| PSTPIP1 | 9051  | Proline-serine-threonine phosphatase interacting protein 1                                | 4 |
| PSTPIP2 | 9050  | Proline-serine-threonine phosphatase interacting protein 2                                | 5 |

|        |        |                                                                                              |   |
|--------|--------|----------------------------------------------------------------------------------------------|---|
| PTBP1  | 5725   | Polypyrimidine tract binding protein 1                                                       | 2 |
| PTBP2  | 58155  | Polypyrimidine tract binding protein 2                                                       | 5 |
| PTEN   | 5728   | Phosphatase and tensin homolog (mutated in multiple advanced cancers 1)                      | 5 |
| PTHHR1 | 5745   | Parathyroid hormone receptor 1                                                               | 4 |
| PTK2   | 5747   | PTK2 protein tyrosine kinase 2                                                               | 5 |
| PTN    | 5764   | Pleiotrophin (heparin binding growth factor 8, neurite growth-promoting factor 1)            | 3 |
| PTP4A1 | 7803   | Protein tyrosine phosphatase type IVA, member 1                                              | 5 |
| PTP4A2 | 8073   | Protein tyrosine phosphatase type IVA, member 2                                              | 4 |
| PTPDC1 | 138639 | Protein tyrosine phosphatase domain containing 1                                             | 5 |
| PTPLA  | 9200   | Protein tyrosine phosphatase-like (proline instead of catalytic arginine), member A          | 5 |
| PTPN1  | 5770   | Protein tyrosine phosphatase, non-receptor type 1                                            | 4 |
| PTPN12 | 5782   | Protein tyrosine phosphatase, non-receptor type 12                                           | 5 |
| PTPN13 | 5783   | Protein tyrosine phosphatase, non-receptor type 13 (APO-1/CD95 (Fas)-associated phosphatase) | 5 |
| PTPN18 | 26469  | Protein tyrosine phosphatase, non-receptor type 18 (brain-derived)                           | 3 |
| PTPN2  | 5771   | Protein tyrosine phosphatase, non-receptor type 2                                            | 5 |
| PTPN22 | 26191  | Protein tyrosine phosphatase, non-receptor type 22 (lymphoid)                                | 5 |
| PTPN23 | 25930  | Protein tyrosine phosphatase, non-receptor type 23                                           | 5 |
| PTPN3  | 5774   | Protein tyrosine phosphatase, non-receptor type 3                                            | 4 |
| PTPN4  | 5775   | Protein tyrosine phosphatase, non-receptor type 4 (megakaryocyte)                            | 5 |
| PTPN5  | 84867  | Protein tyrosine phosphatase, non-receptor type 5 (striatum-enriched)                        | 4 |
| PTPN7  | 5778   | Protein tyrosine phosphatase, non-receptor type 7                                            | 5 |
| PTPN9  | 5780   | Protein tyrosine phosphatase, non-receptor type 9                                            | 5 |
| PTPRA  | 5786   | Protein tyrosine phosphatase, receptor type, A                                               | 5 |
| PTPRB  | 5787   | Protein tyrosine phosphatase, receptor type, B                                               | 5 |
| PTPRC  | 5788   | Protein tyrosine phosphatase, receptor type, C                                               | 5 |
| PTPRD  | 5789   | Protein tyrosine phosphatase, receptor type, D                                               | 5 |
| PTPRE  | 5791   | Protein tyrosine phosphatase, receptor type, E                                               | 4 |
| PTPRF  | 5792   | Protein tyrosine phosphatase, receptor type, F                                               | 5 |
| PTPRG  | 5793   | Protein tyrosine phosphatase, receptor type, G                                               | 5 |
| PTPRH  | 5794   | Protein tyrosine phosphatase, receptor type, H                                               | 4 |
| PTPRJ  | 5795   | Protein tyrosine phosphatase, receptor type, J                                               | 4 |
| PTPRK  | 5796   | Protein tyrosine phosphatase, receptor type, K                                               | 5 |
| PTPRM  | 5797   | Protein tyrosine phosphatase, receptor type, M                                               | 5 |
| PTPRN  | 5798   | Protein tyrosine phosphatase, receptor type, N                                               | 5 |
| PTPRN2 | 5799   | Protein tyrosine phosphatase, receptor type, N polypeptide 2                                 | 5 |
| PTPRO  | 5800   | Protein tyrosine phosphatase, receptor type, O                                               | 5 |
| PTPRR  | 5801   | Protein tyrosine phosphatase, receptor type, R                                               | 4 |
| PTPRS  | 5802   | Protein tyrosine phosphatase, receptor type, S                                               | 5 |

|           |        |                                                                                        |   |
|-----------|--------|----------------------------------------------------------------------------------------|---|
| PTPRZ1    | 5803   | Protein tyrosine phosphatase, receptor-type, Z polypeptide 1                           | 4 |
| PXK       | 54899  | PX domain containing serine/threonine kinase                                           | 5 |
| PXMP3     | 5828   | Peroxisomal membrane protein 3, 35kDa (Zellweger syndrome)                             | 5 |
| RAB11FIP5 | 26056  | RAB11 family interacting protein 5 (class I)                                           | 4 |
| RAB7      | 7879   | RAB7, member RAS oncogene fami                                                         | 5 |
| RAD18     | 56852  | RAD18 homolog (S. cerevisiae)                                                          | 4 |
| RAD23B    | 5887   | RAD23 homolog B (S. cerevisiae)                                                        | 5 |
| RAF1      | 5894   | V-raf-1 murine leukemia viral oncogene homolog 1                                       | 5 |
| RAG1      | 5896   | Recombination activating gene 1                                                        | 4 |
| RAGE      | 5891   | Renal tumor antigen                                                                    | 5 |
| RALY      | 22913  | RNA binding protein, autoantigenic (hnRNP-associated with lethal yellow homolog (mouse | 5 |
| RANBP2    | 5903   | RAN binding protein 2                                                                  | 5 |
| RASA2     | 5922   | RAS p21 protein activator 2                                                            | 5 |
| RASA3     | 22821  | RAS p21 protein activator 3                                                            | 5 |
| RASAL2    | 9462   | RAS protein activator like 2                                                           | 3 |
| RASSF5    | 83593  | Ras association (RalGDS/AF-6) domain family 5                                          | 5 |
| RB1CC1    | 9821   | RB1-inducible coiled-coil 1                                                            | 5 |
| RBCK1     | 10616  | RanBP-type and C3HC4-type zinc finger containing 1                                     | 5 |
| RBM17     | 84991  | RNA binding motif protein 17                                                           | 4 |
| RBM3      | 5935   | RNA binding motif (RNP1, RRM) protein 3                                                | 5 |
| RCHY1     | 25898  | Ring finger and CHY zinc finger domain containing 1                                    | 4 |
| RGS3      | 5998   | Regulator of G-protein signaling 3                                                     | 5 |
| RHBDD3    | 25807  | Rhomboid domain containing 3                                                           | 4 |
| RHO       | 6010   | Rhodopsin (opsin 2, rod pigment) (retinitis pigmentosa 4, autosomal dominant)          | 5 |
| RIMS1     | 22999  | Regulating synaptic membrane exocytosis 1                                              | 5 |
| RIMS2     | 9699   | Regulating synaptic membrane exocytosis 2                                              | 5 |
| RIPK3     | 11035  | Receptor-interacting serine-threonine kinase 3                                         | 5 |
| RKHD2     | 51320  | ring finger and KH domain cont                                                         | 5 |
| RNF111    | 54778  | Ring finger protein 111                                                                | 5 |
| RNF12     | 51132  | Ring finger protein 12                                                                 | 5 |
| RNF121    | 55298  | Ring finger protein 121                                                                | 5 |
| RNF125    | 54941  | Ring finger protein 125                                                                | 5 |
| RNF13     | 11342  | Ring finger protein 13                                                                 | 5 |
| RNF130    | 55819  | Ring finger protein 130                                                                | 5 |
| RNF14     | 9604   | Ring finger protein 14                                                                 | 3 |
| RNF141    | 50862  | Ring finger protein 141                                                                | 5 |
| RNF144    | 9781   | ring finger protein 144                                                                | 5 |
| RNF152    | 220441 | Ring finger protein 152                                                                | 5 |

|              |        |                                                                              |   |
|--------------|--------|------------------------------------------------------------------------------|---|
| RNF166       | 115992 | Ring finger protein 166                                                      | 5 |
| RNF167       | 26001  | Ring finger protein 167                                                      | 5 |
| RNF175       | 285533 | Ring finger protein 175                                                      | 5 |
| RNF186       | 54546  | Ring finger protein 186                                                      | 5 |
| RNF24        | 11237  | Ring finger protein 24                                                       | 5 |
| RNF25        | 64320  | Ring finger protein 25                                                       | 5 |
| RNF38        | 152006 | Ring finger protein 38                                                       | 5 |
| RNF43        | 54894  | Ring finger protein 43                                                       | 4 |
| RNF44        | 22838  | Ring finger protein 44                                                       | 2 |
| RNF8         | 9025   | Ring finger protein 8                                                        | 5 |
| RNGTT        | 8732   | RNA guanylyltransferase and 5'-phosphatase                                   | 5 |
| ROCK1        | 6093   | Rho-associated, coiled-coil containing protein kinase 1                      | 5 |
| ROR1         | 4919   | Receptor tyrosine kinase-like orphan receptor 1                              | 5 |
| ROR2         | 4920   | Receptor tyrosine kinase-like orphan receptor 2                              | 4 |
| RP6-213H19.1 | 51765  | Serine/threonine protein kinase MST4                                         | 5 |
| RPGRIP1      | 57096  | Retinitis pigmentosa GTPase regulator interacting protein 1                  | 5 |
| RPS13        | 6207   | Ribosomal protein S13                                                        | 5 |
| RPS27A       | 6233   | Ribosomal protein S27a                                                       | 5 |
| RPS6KA1      | 6195   | Ribosomal protein S6 kinase, 90kDa, polypeptide 1                            | 5 |
| RPS6KA3      | 6197   | Ribosomal protein S6 kinase, 90kDa, polypeptide 3                            | 5 |
| RPS6KA5      | 9252   | Ribosomal protein S6 kinase, 90kDa, polypeptide 5                            | 5 |
| RPS6KA6      | 27330  | Ribosomal protein S6 kinase, 90kDa, polypeptide 6                            | 5 |
| RPS6KB1      | 6198   | Ribosomal protein S6 kinase, 70kDa, polypeptide 1                            | 5 |
| RPS6KC1      | 26750  | Ribosomal protein S6 kinase, 52kDa, polypeptide 1                            | 5 |
| RSC1A1       | 6248   | Regulatory solute carrier protein, family 1, member 1                        | 5 |
| RWDD1        | 51389  | RWD domain containing 1                                                      | 5 |
| RWDD3        | 25950  | RWD domain containing 3                                                      | 5 |
| RYK          | 6259   | RYK receptor-like tyrosine kinase                                            | 5 |
| SAG          | 6295   | S-antigen; retina and pineal gland (arrestin)                                | 4 |
| SALL1        | 6299   | Sal-like 1 (Drosophila)                                                      | 5 |
| SART1        | 9092   | Squamous cell carcinoma antigen recognized by T cells                        | 4 |
| SCRIB        | 23513  | Scribbled homolog (Drosophila)                                               | 5 |
| SCYL3        | 57147  | SCY1-like 3 (S. cerevisiae)                                                  | 5 |
| SDHA         | 6389   | Succinate dehydrogenase complex, subunit A, flavoprotein (Fp)                | 5 |
| SDHACL       | 340026 | succinate dehydrogenase comple                                               | 5 |
| SDHB         | 6390   | Succinate dehydrogenase complex, subunit B, iron sulfur (Ip)                 | 5 |
| SDHC         | 6391   | Succinate dehydrogenase complex, subunit C, integral membrane protein, 15kDa | 5 |
| SENP1        | 29843  | SUMO1/sentrin specific peptidase 1                                           | 5 |



|          |        |                                                                                            |   |
|----------|--------|--------------------------------------------------------------------------------------------|---|
| SENP2    | 59343  | SUMO1/sentrin/SMT3 specific peptidase 2                                                    | 5 |
| SENP3    | 26168  | SUMO1/sentrin/SMT3 specific peptidase 3                                                    | 5 |
| SENP6    | 26054  | SUMO1/sentrin specific peptidase 6                                                         | 4 |
| SENP7    | 57337  | SUMO1/sentrin specific peptidase 7                                                         | 5 |
| SERPINA6 | 866    | Serpin peptidase inhibitor, clade A (alpha-1 antiproteinase, antitrypsin), member 6        | 4 |
| SERPINB1 | 1992   | Serpin peptidase inhibitor, clade B (ovalbumin), member 1                                  | 5 |
| SERPING1 | 710    | Serpin peptidase inhibitor, clade G (C1 inhibitor), member 1, (angioedema, hereditary)     | 4 |
| SERPINH1 | 871    | Serpin peptidase inhibitor, clade H (heat shock protein 47), member 1, (collagen binding p | 5 |
| SETD2    | 29072  | SET domain containing 2                                                                    | 5 |
| SF1      | 7536   | Splicing factor 1                                                                          | 5 |
| SFPQ     | 6421   | Splicing factor proline/glutamine-rich (polypyrimidine tract binding protein associated)   | 4 |
| SFRS1    | 6426   | Splicing factor, arginine/serine-rich 1 (splicing factor 2, alternate splicing factor)     | 4 |
| SFRS12   | 140890 | Splicing factor, arginine/serine-rich 12                                                   | 5 |
| SFRS3    | 6428   | Splicing factor, arginine/serine-rich 3                                                    | 5 |
| SFRS7    | 6432   | Splicing factor, arginine/serine-rich 7, 35kDa                                             | 5 |
| SGK2     | 10110  | Serum/glucocorticoid regulated kinase 2                                                    | 4 |
| SGK3     | 23678  | Serum/glucocorticoid regulated kinase family, member 3                                     | 5 |
| SGTA     | 6449   | Small glutamine-rich tetratricopeptide repeat (TPR)-containing, alpha                      | 5 |
| SIAH1    | 6477   | Seven in absentia homolog 1 (Drosophila)                                                   | 5 |
| SIRPA    | 140885 | Signal-regulatory protein alpha                                                            | 5 |
| SIRPD    | 128646 | protein tyrosine phosphatase,                                                              | 4 |
| SLC38A3  | 10991  | Solute carrier family 38, member 3                                                         | 5 |
| SLU7     | 10569  | SLU7 splicing factor homolog (S. cerevisiae)                                               | 5 |
| SMARCA3  | 6596   | SWI/SNF related, matrix associ                                                             | 4 |
| SMNDC1   | 10285  | Survival motor neuron domain containing 1                                                  | 4 |
| SMURF1   | 57154  | SMAD specific E3 ubiquitin protein ligase 1                                                | 4 |
| SMURF2   | 64750  | SMAD specific E3 ubiquitin protein ligase 2                                                | 4 |
| SNCA     | 6622   | Synuclein, alpha (non A4 component of amyloid precursor)                                   | 4 |
| SNF1LK   | 150094 | SNF1-like kinase                                                                           | 5 |
| SNRK     | 54861  | SNF related kinase                                                                         | 5 |
| SNW1     | 22938  | SNW domain containing 1                                                                    | 5 |
| SNX1     | 6642   | Sorting nexin 1                                                                            | 5 |
| SORBS2   | 8470   | Sorbin and SH3 domain containing 2                                                         | 4 |
| SORD     | 6652   | Sorbitol dehydrogenase                                                                     | 5 |
| SOX13    | 9580   | SRY (sex determining region Y)-box 13                                                      | 4 |
| SOX2     | 6657   | SRY (sex determining region Y)-box 2                                                       | 2 |
| SRF      | 6722   | Serum response factor (c-fos serum response element-binding transcription factor)          | 3 |
| SRPK1    | 6732   | SFRS protein kinase 1                                                                      | 5 |

|         |        |                                                                            |   |
|---------|--------|----------------------------------------------------------------------------|---|
| SSH1    | 54434  | Slingshot homolog 1 ( <i>Drosophila</i> )                                  | 4 |
| SSH3    | 54961  | Slingshot homolog 3 ( <i>Drosophila</i> )                                  | 3 |
| ST18    | 9705   | Suppression of tumorigenicity 18 (breast carcinoma) (zinc finger protein)  | 5 |
| STAC3   | 246329 | SH3 and cysteine rich domain 3                                             | 4 |
| STAM    | 8027   | Signal transducing adaptor molecule (SH3 domain and ITAM motif) 1          | 5 |
| STAT1   | 6772   | Signal transducer and activator of transcription 1, 91kDa                  | 5 |
| STIL    | 6491   | SCL/TAL1 interrupting locus                                                | 5 |
| STK10   | 6793   | Serine/threonine kinase 10                                                 | 5 |
| STK3    | 6788   | Serine/threonine kinase 3 (STE20 homolog, yeast)                           | 5 |
| STK31   | 56164  | Serine/threonine kinase 31                                                 | 5 |
| STK32B  | 55351  | Serine/threonine kinase 32B                                                | 5 |
| STK33   | 65975  | Serine/threonine kinase 33                                                 | 5 |
| STK35   | 140901 | Serine/threonine kinase 35                                                 | 5 |
| STK38L  | 23012  | Serine/threonine kinase 38 like                                            | 5 |
| STK4    | 6789   | Serine/threonine kinase 4                                                  | 5 |
| STK40   | 83931  | Serine/threonine kinase 40                                                 | 5 |
| STYK1   | 55359  | Serine/threonine/tyrosine kinase 1                                         | 5 |
| STYXL1  | 51657  | Serine/threonine/tyrosine interacting-like 1                               | 5 |
| SUGT1   | 10910  | SGT1, suppressor of G2 allele of SKP1 ( <i>S. cerevisiae</i> )             | 5 |
| SUMO2   | 6613   | SMT3 suppressor of mif two 3 homolog 2 ( <i>S. cerevisiae</i> )            | 5 |
| SUMO3   | 6612   | SMT3 suppressor of mif two 3 homolog 3 ( <i>S. cerevisiae</i> )            | 4 |
| SUPT16H | 11198  | Suppressor of Ty 16 homolog ( <i>S. cerevisiae</i> )                       | 5 |
| SYK     | 6850   | Spleen tyrosine kinase                                                     | 5 |
| SYT11   | 23208  | Synaptotagmin XI                                                           | 5 |
| SYT14   | 255928 | Synaptotagmin XIV                                                          | 5 |
| SYT16   | 83851  | Synaptotagmin XVI                                                          | 5 |
| SYT17   | 51760  | Synaptotagmin XVII                                                         | 5 |
| SYT4    | 6860   | Synaptotagmin IV                                                           | 5 |
| SYTL5   | 94122  | Synaptotagmin-like 5                                                       | 4 |
| TAOK2   | 9344   | TAO kinase 2                                                               | 5 |
| TAOK3   | 51347  | TAO kinase 3                                                               | 5 |
| TBK1    | 29110  | TANK-binding kinase 1                                                      | 5 |
| TBPL1   | 9519   | TBP-like 1                                                                 | 5 |
| TBX4    | 9496   | T-box 4                                                                    | 5 |
| TCEA1   | 6917   | Transcription elongation factor A (SII), 1                                 | 4 |
| TCEB2   | 6923   | Transcription elongation factor B (SIII), polypeptide 2 (18kDa, elongin B) | 2 |
| TDGF1   | 6997   | Teratocarcinoma-derived growth factor 1                                    | 5 |
| TENC1   | 23371  | Tensin like C1 domain containing phosphatase (tensin 2)                    | 5 |

|           |       |                                                                               |   |
|-----------|-------|-------------------------------------------------------------------------------|---|
| TESK1     | 7016  | Testis-specific kinase 1                                                      | 5 |
| TESK2     | 10420 | Testis-specific kinase 2                                                      | 5 |
| TFAP2A    | 7020  | Transcription factor AP-2 alpha (activating enhancer binding protein 2 alpha) | 5 |
| TGFB1     | 7040  | Transforming growth factor, beta 1                                            | 5 |
| THEX1     | 90459 | Three prime histone mRNA exonuclease 1                                        | 5 |
| THOC3     | 84321 | THO complex 3                                                                 | 5 |
| TIE1      | 7075  | Tyrosine kinase with immunoglobulin-like and EGF-like domains 1               | 5 |
| TIPARP    | 25976 | TCDD-inducible poly(ADP-ribose) polymerase                                    | 5 |
| TLK2      | 11011 | Tousled-like kinase 2                                                         | 5 |
| TMEM11    | 8834  | Transmembrane protein 11                                                      | 5 |
| TMEM14B   | 81853 | Transmembrane protein 14B                                                     | 5 |
| TMEM14C   | 51522 | Transmembrane protein 14C                                                     | 5 |
| TNF       | 7124  | Tumor necrosis factor (TNF superfamily, member 2)                             | 4 |
| TNFRSF11A | 8792  | Tumor necrosis factor receptor superfamily, member 11a, NFKB activator        | 5 |
| TNFRSF1B  | 7133  | Tumor necrosis factor receptor superfamily, member 1B                         | 4 |
| TNFRSF7   | 939   | tumor necrosis factor receptor                                                | 5 |
| TNFSF11   | 8600  | Tumor necrosis factor (ligand) superfamily, member 11                         | 5 |
| TNFSF7    | 970   | tumor necrosis factor (ligand)                                                | 4 |
| TNK2      | 10188 | Tyrosine kinase, non-receptor, 2                                              | 5 |
| TNNI3K    | 51086 | TNNI3 interacting kinase                                                      | 5 |
| TNRC6C    | 57690 | Trinucleotide repeat containing 6C                                            | 5 |
| TNS1      | 7145  | Tensin 1                                                                      | 5 |
| TNS3      | 64759 | Tensin 3                                                                      | 5 |
| TOB2      | 10766 | Transducer of ERBB2, 2                                                        | 4 |
| TOP1      | 7150  | Topoisomerase (DNA) I                                                         | 5 |
| TP53      | 7157  | Tumor protein p53 (Li-Fraumeni syndrome)                                      | 4 |
| TPP1      | 1200  | Tripeptidyl peptidase I                                                       | 3 |
| TPTE2     | 93492 | Transmembrane phosphoinositide 3-phosphatase and tensin homolog 2             | 4 |
| TRADD     | 8717  | TNFRSF1A-associated via death domain                                          | 4 |
| TRAF2     | 7186  | TNF receptor-associated factor 2                                              | 4 |
| TREX1     | 11277 | Three prime repair exonuclease 1                                              | 2 |
| TREX2     | 11219 | Three prime repair exonuclease 2                                              | 4 |
| TRIAD3    | 54476 | TRIAD3 protein                                                                | 3 |
| TRIB1     | 10221 | Tribbles homolog 1 (Drosophila)                                               | 5 |
| TRIM10    | 10107 | Tripartite motif-containing 10                                                | 5 |
| TRIM21    | 6737  | Tripartite motif-containing 21                                                | 4 |
| TRIM25    | 7706  | Tripartite motif-containing 25                                                | 5 |
| TRIM26    | 7726  | Tripartite motif-containing 26                                                | 5 |

|         |        |                                                                    |   |
|---------|--------|--------------------------------------------------------------------|---|
| TRIM32  | 22954  | Tripartite motif-containing 32                                     | 4 |
| TRIM50  | 135892 | Tripartite motif-containing 50                                     | 5 |
| TRPV5   | 56302  | Transient receptor potential cation channel, subfamily V, member 5 | 4 |
| TRPV6   | 55503  | Transient receptor potential cation channel, subfamily V, member 6 | 3 |
| TSC22D2 | 9819   | TSC22 domain family, member 2                                      | 5 |
| TSSK2   | 23617  | Testis-specific serine kinase 2                                    | 5 |
| TSSK3   | 81629  | Testis-specific serine kinase 3                                    | 5 |
| TSSK4   | 283629 | Testis-specific serine kinase 4                                    | 4 |
| TTBK2   | 146057 | Tau tubulin kinase 2                                               | 5 |
| TTC3    | 7267   | Tetratricopeptide repeat domain 3                                  | 4 |
| TTRAP   | 51567  | TRAF and TNF receptor associated protein                           | 5 |
| TXK     | 7294   | TXK tyrosine kinase                                                | 5 |
| TYK2    | 7297   | Tyrosine kinase 2                                                  | 5 |
| TYRO3   | 7301   | TYRO3 protein tyrosine kinase                                      | 4 |
| U2AF1   | 7307   | U2 small nuclear RNA auxiliary factor 1                            | 5 |
| U2AF2   | 11338  | U2 small nuclear RNA auxiliary factor 2                            | 5 |
| UBA52   | 7311   | Ubiquitin A-52 residue ribosomal protein fusion product 1          | 4 |
| UBAP1   | 51271  | Ubiquitin associated protein 1                                     | 5 |
| UBAP2   | 55833  | Ubiquitin associated protein 2                                     | 4 |
| UBAP2L  | 9898   | Ubiquitin associated protein 2-like                                | 5 |
| UBASH3A | 53347  | Ubiquitin associated and SH3 domain containing, A                  | 4 |
| UBB     | 7314   | Ubiquitin B                                                        | 3 |
| UBD     | 10537  | Ubiquitin D                                                        | 5 |
| UBE1    | 7317   | ubiquitin-activating enzyme E1                                     | 5 |
| UBE1DC1 | 79876  | ubiquitin-activating enzyme E1                                     | 4 |
| UBE1L   | 7318   | ubiquitin-activating enzyme E1                                     | 4 |
| UBE1L2  | 55236  | hypothetical protein FLJ10808                                      | 5 |
| UBE2A   | 7319   | Ubiquitin-conjugating enzyme E2A (RAD6 homolog)                    | 4 |
| UBE2B   | 7320   | Ubiquitin-conjugating enzyme E2B (RAD6 homolog)                    | 5 |
| UBE2C   | 11065  | Ubiquitin-conjugating enzyme E2C                                   | 4 |
| UBE2D1  | 7321   | Ubiquitin-conjugating enzyme E2D 1 (UBC4/5 homolog, yeast)         | 5 |
| UBE2D2  | 7322   | Ubiquitin-conjugating enzyme E2D 2 (UBC4/5 homolog, yeast)         | 5 |
| UBE2D4  | 51619  | Ubiquitin-conjugating enzyme E2D 4 (putative)                      | 5 |
| UBE2E1  | 7324   | Ubiquitin-conjugating enzyme E2E 1 (UBC4/5 homolog, yeast)         | 5 |
| UBE2G1  | 7326   | Ubiquitin-conjugating enzyme E2G 1 (UBC7 homolog, yeast)           | 5 |
| UBE2G2  | 7327   | Ubiquitin-conjugating enzyme E2G 2 (UBC7 homolog, yeast)           | 5 |
| UBE2H   | 7328   | Ubiquitin-conjugating enzyme E2H (UBC8 homolog, yeast)             | 5 |
| UBE2I   | 7329   | Ubiquitin-conjugating enzyme E2I (UBC9 homolog, yeast)             | 3 |

|        |        |                                                                                         |   |
|--------|--------|-----------------------------------------------------------------------------------------|---|
| UBE2J1 | 51465  | Ubiquitin-conjugating enzyme E2, J1 (UBC6 homolog, yeast)                               | 5 |
| UBE2L3 | 7332   | Ubiquitin-conjugating enzyme E2L 3                                                      | 5 |
| UBE2N  | 7334   | Ubiquitin-conjugating enzyme E2N (UBC13 homolog, yeast)                                 | 5 |
| UBE2O  | 63893  | Ubiquitin-conjugating enzyme E2O                                                        | 4 |
| UBE2Q1 | 55585  | Ubiquitin-conjugating enzyme E2Q (putative) 1                                           | 5 |
| UBE2Q2 | 92912  | Ubiquitin-conjugating enzyme E2Q (putative) 2                                           | 5 |
| UBE2R2 | 54926  | Ubiquitin-conjugating enzyme E2R 2                                                      | 5 |
| UBE2S  | 27338  | Ubiquitin-conjugating enzyme E2S                                                        | 5 |
| UBE2T  | 29089  | Ubiquitin-conjugating enzyme E2T (putative)                                             | 5 |
| UBE2V2 | 7336   | Ubiquitin-conjugating enzyme E2 variant 2                                               | 4 |
| UBE2W  | 55284  | Ubiquitin-conjugating enzyme E2W (putative)                                             | 5 |
| UBE3A  | 7337   | Ubiquitin protein ligase E3A (human papilloma virus E6-associated protein, Angelman syn | 5 |
| UBE3C  | 9690   | Ubiquitin protein ligase E3C                                                            | 4 |
| UBL3   | 5412   | Ubiquitin-like 3                                                                        | 4 |
| UBL4A  | 8266   | Ubiquitin-like 4A                                                                       | 5 |
| UBOX5  | 22888  | U-box domain containing 5                                                               | 5 |
| UBPH   | 56061  | similar to ubiquitin binding p                                                          | 4 |
| UBQLN1 | 29979  | Ubiquilin 1                                                                             | 5 |
| UBQLN2 | 29978  | Ubiquilin 2                                                                             | 5 |
| UBQLN3 | 50613  | Ubiquilin 3                                                                             | 5 |
| UBQLN4 | 56893  | Ubiquilin 4                                                                             | 4 |
| UBR1   | 197131 | Ubiquitin protein ligase E3 component n-recognin 1                                      | 5 |
| UBR2   | 23304  | Ubiquitin protein ligase E3 component n-recognin 2                                      | 5 |
| UBXD2  | 23190  | UBX domain containing 2                                                                 | 5 |
| UBXD4  | 165324 | UBX domain containing 4                                                                 | 5 |
| UBXD8  | 23197  | UBX domain containing 8                                                                 | 4 |
| UCHL5  | 51377  | Ubiquitin carboxyl-terminal hydrolase L5                                                | 5 |
| UEVLD  | 55293  | UEV and lactate/malate dehydrogenase domains                                            | 4 |
| UFC1   | 51506  | Ubiquitin-fold modifier conjugating enzyme 1                                            | 5 |
| UGCGL1 | 56886  | UDP-glucose ceramide glucosyltransferase-like 1                                         | 5 |
| UGDH   | 7358   | UDP-glucose dehydrogenase                                                               | 5 |
| UHMK1  | 127933 | U2AF homology motif (UHM) kinase 1                                                      | 5 |
| UHRF1  | 29128  | Ubiquitin-like, containing PHD and RING finger domains, 1                               | 5 |
| UHRF2  | 115426 | Ubiquitin-like, containing PHD and RING finger domains, 2                               | 4 |
| ULK4   | 54986  | Unc-51-like kinase 4 (C. elegans)                                                       | 5 |
| UNC13B | 10497  | Unc-13 homolog B (C. elegans)                                                           | 5 |
| USP1   | 7398   | Ubiquitin specific peptidase 1                                                          | 4 |
| USP12  | 219333 | Ubiquitin specific peptidase 12                                                         | 5 |

|         |       |                                                              |   |
|---------|-------|--------------------------------------------------------------|---|
| USP16   | 10600 | Ubiquitin specific peptidase 16                              | 5 |
| USP18   | 11274 | Ubiquitin specific peptidase 18                              | 4 |
| USP20   | 10868 | Ubiquitin specific peptidase 20                              | 5 |
| USP21   | 27005 | Ubiquitin specific peptidase 21                              | 5 |
| USP25   | 29761 | Ubiquitin specific peptidase 25                              | 5 |
| USP28   | 57646 | Ubiquitin specific peptidase 28                              | 3 |
| USP29   | 57663 | Ubiquitin specific peptidase 29                              | 5 |
| USP3    | 9960  | Ubiquitin specific peptidase 3                               | 5 |
| USP31   | 57478 | Ubiquitin specific peptidase 31                              | 5 |
| USP33   | 23032 | Ubiquitin specific peptidase 33                              | 5 |
| USP37   | 57695 | Ubiquitin specific peptidase 37                              | 4 |
| USP39   | 10713 | Ubiquitin specific peptidase 39                              | 5 |
| USP4    | 7375  | Ubiquitin specific peptidase 4 (proto-oncogene)              | 5 |
| USP47   | 55031 | Ubiquitin specific peptidase 47                              | 5 |
| USP49   | 25862 | Ubiquitin specific peptidase 49                              | 5 |
| USP5    | 8078  | Ubiquitin specific peptidase 5 (isopeptidase T)              | 5 |
| USP52   | 9924  | Ubiquitin specific peptidase 52                              | 4 |
| USP7    | 7874  | Ubiquitin specific peptidase 7 (herpes virus-associated)     | 4 |
| VCP     | 7415  | Valosin-containing protein                                   | 5 |
| VEGF    | 7422  | vascular endothelial growth fa                               | 5 |
| VPS28   | 51160 | Vacuolar protein sorting 28 homolog (S. cerevisiae)          | 4 |
| VRK1    | 7443  | Vaccinia related kinase 1                                    | 5 |
| WEE1    | 7465  | WEE1 homolog (S. pombe)                                      | 5 |
| WNK2    | 65268 | WNK lysine deficient protein kinase 2                        | 5 |
| WNK3    | 65267 | WNK lysine deficient protein kinase 3                        | 5 |
| WRN     | 7486  | Werner syndrome                                              | 5 |
| WRNIP1  | 56897 | Werner helicase interacting protein 1                        | 5 |
| WT1     | 7490  | Wilms tumor 1                                                | 4 |
| WTAP    | 9589  | Wilms tumor 1 associated protein                             | 5 |
| WWP1    | 11059 | WW domain containing E3 ubiquitin protein ligase 1           | 4 |
| WWP2    | 11060 | WW domain containing E3 ubiquitin protein ligase 2           | 5 |
| XDH     | 7498  | Xanthine dehydrogenase                                       | 4 |
| YES1    | 7525  | V-yes-1 Yamaguchi sarcoma viral oncogene homolog 1           | 5 |
| YSK4    | 80122 | Yeast Sps1/Ste20-related kinase 4 (S. cerevisiae)            | 5 |
| ZAK     | 51776 | Sterile alpha motif and leucine zipper containing kinase AZK | 5 |
| ZC3HAV1 | 56829 | Zinc finger CCCH-type, antiviral 1                           | 4 |
| ZFAND3  | 60685 | Zinc finger, AN1-type domain 3                               | 5 |
| ZFAND6  | 54469 | Zinc finger, AN1-type domain 6                               | 4 |

|        |        |                                     |   |
|--------|--------|-------------------------------------|---|
| ZFHX1B | 9839   | zinc finger homeobox 1b             | 4 |
| ZMAT2  | 153527 | Zinc finger, matrin type 2          | 4 |
| ZNF313 | 55905  | Zinc finger protein 313             | 5 |
| ZNF364 | 27246  | Zinc finger protein 364             | 4 |
| ZNF96  | 9753   | zinc finger protein 305             | 4 |
| ZNRF4  | 148066 | Zinc and ring finger 4              | 5 |
| ZSWIM2 | 151112 | Zinc finger, SWIM-type containing 2 | 5 |

### POOL 3

| Symbol  | NCBI Gene ID | Description                                                                 | Number of shRNAs |
|---------|--------------|-----------------------------------------------------------------------------|------------------|
| A2M     | 2            | Alpha-2-macroglobulin                                                       | 5                |
| ACR     | 49           | Acrosin                                                                     | 5                |
| ACVR1   | 90           | Activin A receptor, type I                                                  | 5                |
| ACVR2A  | 92           | Activin A receptor, type IIA                                                | 5                |
| ACVR2B  | 93           | Activin A receptor, type IIB                                                | 5                |
| ACVRL1  | 94           | Activin A receptor type II-like 1                                           | 4                |
| ADAM10  | 102          | ADAM metallopeptidase domain 10                                             | 5                |
| ADAM8   | 101          | ADAM metallopeptidase domain 8                                              | 5                |
| ADRBK1  | 156          | Adrenergic, beta, receptor kinase 1                                         | 5                |
| AFF4    | 27125        | AF4/FMR2 family, member 4                                                   | 5                |
| AFG3L1  | 172          | AFG3 ATPase family gene 3-like 1 ( <i>S. cerevisiae</i> )                   | 5                |
| AGT     | 183          | Angiotensinogen (serpin peptidase inhibitor, clade A, member 8)             | 5                |
| AHSG    | 197          | Alpha-2-HS-glycoprotein                                                     | 4                |
| AKT2    | 208          | V-akt murine thymoma viral oncogene homolog 2                               | 5                |
| ALK     | 238          | Anaplastic lymphoma kinase (Ki-1)                                           | 5                |
| ALX3    | 257          | Aristaless-like homeobox 3                                                  | 5                |
| AMBP    | 259          | Alpha-1-microglobulin/bikunin precursor                                     | 4                |
| APAF1   | 317          | Apoptotic peptidase activating factor 1                                     | 5                |
| APLP2   | 334          | Amyloid beta (A4) precursor-like protein 2                                  | 5                |
| APP     | 351          | Amyloid beta (A4) precursor protein (peptidase nexin-II, Alzheimer disease) | 3                |
| ARAF    | 369          | V-raf murine sarcoma 3611 viral oncogene homolog                            | 5                |
| ARHGAP5 | 394          | Rho GTPase activating protein 5                                             | 5                |
| ASCL1   | 429          | Achaete-scute complex homolog 1 ( <i>Drosophila</i> )                       | 4                |
| ASCL2   | 430          | Achaete-scute complex homolog 2 ( <i>Drosophila</i> )                       | 5                |
| ATBF1   | 463          | AT-binding transcription facto                                              | 3                |
| ATF1    | 466          | Activating transcription factor 1                                           | 5                |
| ATF3    | 467          | Activating transcription factor 3                                           | 5                |
| ATF4    | 468          | Activating transcription factor 4 (tax-responsive enhancer element B67)     | 4                |

|          |       |                                                                                               |   |
|----------|-------|-----------------------------------------------------------------------------------------------|---|
| ATF7IP2  | 80063 | Activating transcription factor 7 interacting protein 2                                       | 5 |
| ATOH1    | 474   | Atonal homolog 1 (Drosophila)                                                                 | 4 |
| ATRX     | 546   | Alpha thalassemia/mental retardation syndrome X-linked (RAD54 homolog, <i>S. cerevisiae</i> ) | 4 |
| AURKA    | 6790  | Aurora kinase A                                                                               | 4 |
| AURKB    | 9212  | Aurora kinase B                                                                               | 4 |
| AXL      | 558   | AXL receptor tyrosine kinase                                                                  | 5 |
| AZU1     | 566   | Azurocidin 1 (cationic antimicrobial protein 37)                                              | 4 |
| BACE1    | 23621 | Beta-site APP-cleaving enzyme 1                                                               | 5 |
| BACH1    | 571   | BTB and CNC homology 1, basic leucine zipper transcription factor 1                           | 5 |
| BAPX1    | 579   | bagpipe homeobox homolog 1 (Dr                                                                | 5 |
| BAZ2A    | 11176 | Bromodomain adjacent to zinc finger domain, 2A                                                | 5 |
| BBS4     | 585   | Bardet-Biedl syndrome 4                                                                       | 5 |
| BCL6     | 604   | B-cell CLL/lymphoma 6 (zinc finger protein 51)                                                | 5 |
| BCR      | 613   | Breakpoint cluster region                                                                     | 5 |
| BMP2K    | 55589 | BMP2 inducible kinase                                                                         | 5 |
| BMPR1A   | 657   | Bone morphogenetic protein receptor, type IA                                                  | 5 |
| BMPR1B   | 658   | Bone morphogenetic protein receptor, type IB                                                  | 5 |
| BMPR2    | 659   | Bone morphogenetic protein receptor, type II (serine/threonine kinase)                        | 5 |
| BRSK2    | 9024  | BR serine/threonine kinase 2                                                                  | 5 |
| BTK      | 695   | Bruton agammaglobulinemia tyrosine kinase                                                     | 5 |
| BTRC     | 8945  | Beta-transducin repeat containing                                                             | 5 |
| BUB1     | 699   | BUB1 budding uninhibited by benzimidazoles 1 homolog (yeast)                                  | 4 |
| BUB1B    | 701   | BUB1 budding uninhibited by benzimidazoles 1 homolog beta (yeast)                             | 5 |
| C10orf1  | 11241 | chromosome 10 open reading frame 1                                                            | 4 |
| C21orf66 | 94104 | Chromosome 21 open reading frame 66                                                           | 5 |
| CAMK1    | 8536  | Calcium/calmodulin-dependent protein kinase I                                                 | 5 |
| CAMK2B   | 816   | Calcium/calmodulin-dependent protein kinase (CaM kinase) II beta                              | 5 |
| CAMK2D   | 817   | Calcium/calmodulin-dependent protein kinase (CaM kinase) II delta                             | 5 |
| CAMK2G   | 818   | Calcium/calmodulin-dependent protein kinase (CaM kinase) II gamma                             | 5 |
| CAMK4    | 814   | Calcium/calmodulin-dependent protein kinase IV                                                | 5 |
| CASK     | 8573  | Calcium/calmodulin-dependent serine protein kinase (MAGUK family)                             | 5 |
| CDC2     | 983   | Cell division cycle 2, G1 to S and G2 to M                                                    | 5 |
| CDC2L5   | 8621  | Cell division cycle 2-like 5 (cholinesterase-related cell division controller)                | 5 |
| CDC42BPA | 8476  | CDC42 binding protein kinase alpha (DMPK-like)                                                | 5 |
| CDC42BPB | 9578  | CDC42 binding protein kinase beta (DMPK-like)                                                 | 4 |
| CDK10    | 8558  | Cyclin-dependent kinase 10                                                                    | 5 |
| CDK2     | 1017  | Cyclin-dependent kinase 2                                                                     | 5 |
| CDK3     | 1018  | Cyclin-dependent kinase 3                                                                     | 4 |



|         |       |                                                                                   |   |
|---------|-------|-----------------------------------------------------------------------------------|---|
| CDK4    | 1019  | Cyclin-dependent kinase 4                                                         | 4 |
| CDK6    | 1021  | Cyclin-dependent kinase 6                                                         | 5 |
| CDK7    | 1022  | Cyclin-dependent kinase 7                                                         | 5 |
| CDK8    | 1024  | Cyclin-dependent kinase 8                                                         | 5 |
| CDK9    | 1025  | Cyclin-dependent kinase 9                                                         | 5 |
| CDKL2   | 8999  | Cyclin-dependent kinase-like 2 (CDC2-related kinase)                              | 5 |
| CENPN   | 55839 | Centromere protein N                                                              | 5 |
| CHEK1   | 1111  | CHK1 checkpoint homolog (S. pombe)                                                | 5 |
| ChGn    | 55790 | Chondroitin beta1,4 N-acetylgalactosaminyltransferase                             | 5 |
| CHUK    | 1147  | Conserved helix-loop-helix ubiquitous kinase                                      | 5 |
| CITED2  | 10370 | Cbp/p300-interacting transactivator, with Glu/Asp-rich carboxy-terminal domain, 2 | 5 |
| CLK1    | 1195  | CDC-like kinase 1                                                                 | 5 |
| CLK2    | 1196  | CDC-like kinase 2                                                                 | 4 |
| CLK3    | 1198  | CDC-like kinase 3                                                                 | 5 |
| CPNE3   | 8895  | Copine III                                                                        | 5 |
| CPSF1   | 29894 | Cleavage and polyadenylation specific factor 1, 160kDa                            | 5 |
| CPSF6   | 11052 | Cleavage and polyadenylation specific factor 6, 68kDa                             | 5 |
| CREB3L1 | 90993 | CAMP responsive element binding protein 3-like 1                                  | 5 |
| CREBBP  | 1387  | CREB binding protein (Rubinstein-Taybi syndrome)                                  | 4 |
| CSK     | 1445  | C-src tyrosine kinase                                                             | 5 |
| CSNK1D  | 1453  | Casein kinase 1, delta                                                            | 5 |
| CSNK1E  | 1454  | Casein kinase 1, epsilon                                                          | 5 |
| CSNK1G3 | 1456  | Casein kinase 1, gamma 3                                                          | 4 |
| CSNK2A1 | 1457  | Casein kinase 2, alpha 1 polypeptide                                              | 5 |
| CSNK2A2 | 1459  | Casein kinase 2, alpha prime polypeptide                                          | 5 |
| CUL2    | 8453  | Cullin 2                                                                          | 5 |
| CUL4A   | 8451  | Cullin 4A                                                                         | 5 |
| CUL4B   | 8450  | Cullin 4B                                                                         | 5 |
| CUL5    | 8065  | Cullin 5                                                                          | 4 |
| CUL7    | 9820  | Cullin 7                                                                          | 5 |
| DAPK1   | 1612  | Death-associated protein kinase 1                                                 | 4 |
| DAPK3   | 1613  | Death-associated protein kinase 3                                                 | 5 |
| DDR1    | 780   | Discoidin domain receptor family, member 1                                        | 4 |
| DDX3X   | 1654  | DEAD (Asp-Glu-Ala-Asp) box polypeptide 3, X-linked                                | 5 |
| DDX3Y   | 8653  | DEAD (Asp-Glu-Ala-Asp) box polypeptide 3, Y-linked                                | 5 |
| DGKB    | 1607  | Diacylglycerol kinase, beta 90kDa                                                 | 5 |
| DGKD    | 8527  | Diacylglycerol kinase, delta 130kDa                                               | 5 |
| DGKG    | 1608  | Diacylglycerol kinase, gamma 90kDa                                                | 5 |

|        |       |                                                                                                 |   |
|--------|-------|-------------------------------------------------------------------------------------------------|---|
| DGKZ   | 8525  | Diacylglycerol kinase, zeta 104kDa                                                              | 3 |
| DHX15  | 1665  | DEAH (Asp-Glu-Ala-His) box polypeptide 15                                                       | 5 |
| DHX8   | 1659  | DEAH (Asp-Glu-Ala-His) box polypeptide 8                                                        | 4 |
| DMPK   | 1760  | Dystrophia myotonica-protein kinase                                                             | 5 |
| DNM2   | 1785  | Dynamin 2                                                                                       | 5 |
| DYRK1A | 1859  | Dual-specificity tyrosine-(Y)-phosphorylation regulated kinase 1A                               | 5 |
| DYRK2  | 8445  | Dual-specificity tyrosine-(Y)-phosphorylation regulated kinase 2                                | 5 |
| DYRK3  | 8444  | Dual-specificity tyrosine-(Y)-phosphorylation regulated kinase 3                                | 4 |
| DYRK4  | 8798  | Dual-specificity tyrosine-(Y)-phosphorylation regulated kinase 4                                | 4 |
| DYSF   | 8291  | Dysferlin, limb girdle muscular dystrophy 2B (autosomal recessive)                              | 5 |
| E2F1   | 1869  | E2F transcription factor 1                                                                      | 5 |
| ECD    | 11319 | Ecdysoneless homolog (Drosophila)                                                               | 5 |
| EPHB1  | 2047  | EPH receptor B1                                                                                 | 5 |
| ERBB3  | 2065  | V-erb-b2 erythroblastic leukemia viral oncogene homolog 3 (avian)                               | 5 |
| ERN1   | 2081  | Endoplasmic reticulum to nucleus signaling 1                                                    | 5 |
| EWSR1  | 2130  | Ewing sarcoma breakpoint region 1                                                               | 5 |
| FBXW2  | 26190 | F-box and WD repeat domain containing 2                                                         | 5 |
| FBXW7  | 55294 | F-box and WD repeat domain containing 7                                                         | 4 |
| FES    | 2242  | Feline sarcoma oncogene                                                                         | 4 |
| FEZF2  | 55079 | FEZ family zinc finger 2                                                                        | 5 |
| FGFR1  | 2260  | Fibroblast growth factor receptor 1 (fms-related tyrosine kinase 2, Pfeiffer syndrome)          | 5 |
| FGFR2  | 2263  | Fibroblast growth factor receptor 2 (bacteria-expressed kinase, keratinocyte growth factor)     | 5 |
| FGFR3  | 2261  | Fibroblast growth factor receptor 3 (achondroplasia, thanatophoric dwarfism)                    | 4 |
| FGFR4  | 2264  | Fibroblast growth factor receptor 4                                                             | 3 |
| FKBP5  | 2289  | FK506 binding protein 5                                                                         | 5 |
| FKHL18 | 2307  | Forkhead-like 18 (Drosophila)                                                                   | 5 |
| FLT1   | 2321  | Fms-related tyrosine kinase 1 (vascular endothelial growth factor/vascular permeability factor) | 5 |
| FLT3   | 2322  | Fms-related tyrosine kinase 3                                                                   | 4 |
| FLT4   | 2324  | Fms-related tyrosine kinase 4                                                                   | 5 |
| FOS    | 2353  | V-fos FBJ murine osteosarcoma viral oncogene homolog                                            | 5 |
| FOXB1  | 27023 | Forkhead box B1                                                                                 | 4 |
| FOXC2  | 2303  | Forkhead box C2 (MFH-1, mesenchyme forkhead 1)                                                  | 5 |
| FOXD2  | 2306  | Forkhead box D2                                                                                 | 4 |
| FOXD3  | 27022 | Forkhead box D3                                                                                 | 4 |
| FOXE1  | 2304  | Forkhead box E1 (thyroid transcription factor 2)                                                | 4 |
| FOXL2  | 668   | Forkhead box L2                                                                                 | 5 |
| FOXM1  | 2305  | Forkhead box M1                                                                                 | 5 |
| FOXP1  | 27086 | Forkhead box P1                                                                                 | 5 |

|         |        |                                                       |   |
|---------|--------|-------------------------------------------------------|---|
| FOXR1   | 283150 | Forkhead box R1                                       | 5 |
| GATAD1  | 57798  | GATA zinc finger domain containing 1                  | 5 |
| GATAD2A | 54815  | GATA zinc finger domain containing 2A                 | 4 |
| GNMT    | 27232  | Glycine N-methyltransferase                           | 5 |
| GREB1   | 9687   | GREB1 protein                                         | 5 |
| GRHL2   | 79977  | Grainyhead-like 2 (Drosophila)                        | 5 |
| GRK4    | 2868   | G protein-coupled receptor kinase 4                   | 5 |
| GRK5    | 2869   | G protein-coupled receptor kinase 5                   | 4 |
| GSK3B   | 2932   | Glycogen synthase kinase 3 beta                       | 3 |
| GUCY2D  | 3000   | Guanylate cyclase 2D, membrane (retina-specific)      | 4 |
| GUCY2F  | 2986   | Guanylate cyclase 2F, retinal                         | 5 |
| H2BFM   | 286436 | H2B histone family, member M                          | 5 |
| HELLS   | 3070   | Helicase, lymphoid-specific                           | 5 |
| HERC3   | 8916   | Hect domain and RLD 3                                 | 5 |
| HGD     | 3081   | Homogentisate 1,2-dioxygenase (homogentisate oxidase) | 5 |
| HMG20A  | 10363  | High-mobility group 20A                               | 5 |
| HMG20B  | 10362  | High-mobility group 20B                               | 5 |
| HMX3    | 340784 | H6 family homeobox 3                                  | 4 |
| HNRPC   | 3183   | heterogeneous nuclear ribonucl                        | 4 |
| HOXA13  | 3209   | Homeobox A13                                          | 5 |
| HOXB1   | 3211   | Homeobox B1                                           | 4 |
| HOXB2   | 3212   | Homeobox B2                                           | 4 |
| HOXB3   | 3213   | Homeobox B3                                           | 5 |
| HOXB4   | 3214   | Homeobox B4                                           | 5 |
| HOXB5   | 3215   | Homeobox B5                                           | 5 |
| HOXB6   | 3216   | Homeobox B6                                           | 4 |
| HOXB7   | 3217   | Homeobox B7                                           | 4 |
| HOXB8   | 3218   | Homeobox B8                                           | 5 |
| HPGD    | 3248   | Hydroxyprostaglandin dehydrogenase 15-(NAD)           | 5 |
| IDE     | 3416   | Insulin-degrading enzyme                              | 5 |
| IGF1R   | 3480   | Insulin-like growth factor 1 receptor                 | 5 |
| ILK     | 3611   | Integrin-linked kinase                                | 5 |
| INPP4A  | 3631   | Inositol polyphosphate-4-phosphatase, type I, 107kDa  | 5 |
| INSR    | 3643   | Insulin receptor                                      | 4 |
| IRAK1   | 3654   | Interleukin-1 receptor-associated kinase 1            | 5 |
| IRAK2   | 3656   | Interleukin-1 receptor-associated kinase 2            | 4 |
| IRAK3   | 11213  | Interleukin-1 receptor-associated kinase 3            | 5 |
| JAK3    | 3718   | Janus kinase 3 (a protein tyrosine kinase, leukocyte) | 5 |

|           |        |                                                                                                |   |
|-----------|--------|------------------------------------------------------------------------------------------------|---|
| KCNMA1    | 3778   | Potassium large conductance calcium-activated channel, subfamily M, alpha member 1             | 5 |
| KHDRBS1   | 10657  | KH domain containing, RNA binding, signal transduction associated 1                            | 5 |
| KIAA1627  | 57721  | KIAA1627 protein                                                                               | 5 |
| KIFC1     | 3833   | Kinesin family member C1                                                                       | 5 |
| KIN       | 22944  | KIN, antigenic determinant of recA protein homolog (mouse)                                     | 5 |
| KIT       | 3815   | V-kit Hardy-Zuckerman 4 feline sarcoma viral oncogene homolog                                  | 5 |
| KLF12     | 11278  | Kruppel-like factor 12                                                                         | 5 |
| KLF8      | 11279  | Kruppel-like factor 8                                                                          | 5 |
| KLK3      | 354    | Kallikrein-related peptidase 3                                                                 | 5 |
| L3MBTL4   | 91133  | L(3)mbt-like 4 (Drosophila)                                                                    | 5 |
| LATS2     | 26524  | LATS, large tumor suppressor, homolog 2 (Drosophila)                                           | 5 |
| LIMK1     | 3984   | LIM domain kinase 1                                                                            | 2 |
| LMO7      | 4008   | LIM domain 7                                                                                   | 5 |
| LOC285563 | 285563 | similar to Transcription initi                                                                 | 5 |
| LOC285697 | 285697 | similar to Transcription initi                                                                 | 5 |
| LOC339799 | 339799 | similar to eukaryotic translat                                                                 | 5 |
| LOC340260 | 340260 | similar to Unc4.1 homeobox                                                                     | 5 |
| LOC340501 | 340501 | Similar to Transcription elongation factor A protein 1 (Transcription elongation factor S-II p | 5 |
| LOC340765 | 340765 | similar to double homeobox, 4;                                                                 | 5 |
| LOC341098 | 341098 | similar to ENSANGP00000020885                                                                  | 4 |
| LZTS1     | 11178  | Leucine zipper, putative tumor suppressor 1                                                    | 4 |
| MAF       | 4094   | V-maf musculoaponeurotic fibrosarcoma oncogene homolog (avian)                                 | 5 |
| MAP3K12   | 7786   | Mitogen-activated protein kinase kinase kinase 12                                              | 5 |
| MAP3K14   | 9020   | Mitogen-activated protein kinase kinase kinase 14                                              | 4 |
| MAP3K4    | 4216   | Mitogen-activated protein kinase kinase kinase 4                                               | 4 |
| MAP3K5    | 4217   | Mitogen-activated protein kinase kinase kinase 5                                               | 5 |
| MAP4K3    | 8491   | Mitogen-activated protein kinase kinase kinase kinase 3                                        | 4 |
| MAPK13    | 5603   | Mitogen-activated protein kinase 13                                                            | 4 |
| MAPK14    | 1432   | Mitogen-activated protein kinase 14                                                            | 5 |
| MAPK9     | 5601   | Mitogen-activated protein kinase 9                                                             | 5 |
| MAPKAPK5  | 8550   | Mitogen-activated protein kinase-activated protein kinase 5                                    | 5 |
| MAZ       | 4150   | MYC-associated zinc finger protein (purine-binding transcription factor)                       | 5 |
| MBD1      | 4152   | Methyl-CpG binding domain protein 1                                                            | 5 |
| MCM5      | 4174   | Minichromosome maintenance complex component 5                                                 | 4 |
| MDF1      | 4188   | MyoD family inhibitor                                                                          | 4 |
| MDS1      | 4197   | Myelodysplasia syndrome 1                                                                      | 5 |
| MEF2B     | 4207   | MADS box transcription enhance                                                                 | 5 |
| MEF2C     | 4208   | Myocyte enhancer factor 2C                                                                     | 5 |

|        |        |                                                                                          |   |
|--------|--------|------------------------------------------------------------------------------------------|---|
| MEF2D  | 4209   | Myocyte enhancer factor 2D                                                               | 5 |
| MEIS1  | 4211   | Meis homeobox 1                                                                          | 5 |
| MEIS2  | 4212   | Meis homeobox 2                                                                          | 5 |
| MERTK  | 10461  | C-mer proto-oncogene tyrosine kinase                                                     | 5 |
| MET    | 4233   | Met proto-oncogene (hepatocyte growth factor receptor)                                   | 5 |
| MKL2   | 57496  | MKL/myocardin-like 2                                                                     | 5 |
| MKX    | 283078 | Mohawk homeobox                                                                          | 5 |
| MLX    | 6945   | MAX-like protein X                                                                       | 5 |
| MPP6   | 51678  | Membrane protein, palmitoylated 6 (MAGUK p55 subfamily member 6)                         | 5 |
| MYLK   | 4638   | Myosin, light chain kinase                                                               | 3 |
| MYLK2  | 85366  | Myosin light chain kinase 2, skeletal muscle                                             | 3 |
| NEDD4L | 23327  | Neural precursor cell expressed, developmentally down-regulated 4-like                   | 5 |
| NEDD8  | 4738   | Neural precursor cell expressed, developmentally down-regulated 8                        | 5 |
| NEK2   | 4751   | NIMA (never in mitosis gene a)-related kinase 2                                          | 5 |
| NEK9   | 91754  | NIMA (never in mitosis gene a)- related kinase 9                                         | 4 |
| NFKB1  | 4790   | Nuclear factor of kappa light polypeptide gene enhancer in B-cells 1 (p105)              | 5 |
| NFKB2  | 4791   | Nuclear factor of kappa light polypeptide gene enhancer in B-cells 2 (p49/p100)          | 5 |
| NPR2   | 4882   | Natriuretic peptide receptor B/guanylate cyclase B (atrionatriuretic peptide receptor B) | 4 |
| NRL    | 4901   | Neural retina leucine zipper                                                             | 5 |
| NUAK1  | 9891   | NUAK family, SNF1-like kinase, 1                                                         | 5 |
| NUDT21 | 11051  | Nudix (nucleoside diphosphate linked moiety X)-type motif 21                             | 5 |
| OTX1   | 5013   | Orthodenticle homeobox 1                                                                 | 5 |
| OTX2   | 5015   | Orthodenticle homeobox 2                                                                 | 4 |
| OVOL1  | 5017   | Ovo-like 1(Drosophila)                                                                   | 5 |
| PABPN1 | 8106   | Poly(A) binding protein, nuclear 1                                                       | 5 |
| PARK2  | 5071   | Parkinson disease (autosomal recessive, juvenile) 2, parkin                              | 5 |
| PAX1   | 5075   | Paired box 1                                                                             | 5 |
| PAX2   | 5076   | Paired box 2                                                                             | 5 |
| PAX3   | 5077   | Paired box 3                                                                             | 5 |
| PAX4   | 5078   | Paired box 4                                                                             | 5 |
| PB1    | 55193  | polybromo 1                                                                              | 5 |
| PDIA2  | 64714  | Protein disulfide isomerase family A, member 2                                           | 5 |
| PDK3   | 5165   | Pyruvate dehydrogenase kinase, isozyme 3                                                 | 4 |
| PHF12  | 57649  | PHD finger protein 12                                                                    | 4 |
| PHKG2  | 5261   | Phosphorylase kinase, gamma 2 (testis)                                                   | 5 |
| PHOX2A | 401    | Paired-like homeobox 2a                                                                  | 5 |
| PIK3R4 | 30849  | Phosphoinositide-3-kinase, regulatory subunit 4, p150                                    | 4 |
| PLCB3  | 5331   | Phospholipase C, beta 3 (phosphatidylinositol-specific)                                  | 5 |

|          |        |                                                                                     |    |
|----------|--------|-------------------------------------------------------------------------------------|----|
| PLK2     | 10769  | Polo-like kinase 2 ( <i>Drosophila</i> )                                            | 4  |
| PLK3     | 1263   | Polo-like kinase 3 ( <i>Drosophila</i> )                                            | 5  |
| POU6F2   | 11281  | POU class 6 homeobox 2                                                              | 5  |
| PPIL1    | 51645  | Peptidylprolyl isomerase (cyclophilin)-like 1                                       | 5  |
| PPIL2    | 23759  | Peptidylprolyl isomerase (cyclophilin)-like 2                                       | 5  |
| PPIL3    | 53938  | Peptidylprolyl isomerase (cyclophilin)-like 3                                       | 5  |
| PPWD1    | 23398  | Peptidylprolyl isomerase domain and WD repeat containing 1                          | 5  |
| PRDM1    | 639    | PR domain containing 1, with ZNF domain                                             | 5  |
| PRDM4    | 11108  | PR domain containing 4                                                              | 5  |
| PRIM2A   | 5558   | primase, polypeptide 2A, 58kDa                                                      | 5  |
| PRKAA1   | 5562   | Protein kinase, AMP-activated, alpha 1 catalytic subunit                            | 5  |
| PRKCE    | 5581   | Protein kinase C, epsilon                                                           | 5  |
| PRKG1    | 5592   | Protein kinase, cGMP-dependent, type I                                              | 4  |
| PRPF18   | 8559   | PRP18 pre-mRNA processing factor 18 homolog ( <i>S. cerevisiae</i> )                | 4  |
| PRPF4B   | 8899   | PRP4 pre-mRNA processing factor 4 homolog B (yeast)                                 | 5  |
| PTF1A    | 256297 | Pancreas specific transcription factor, 1a                                          | 5  |
| PTGER4   | 5734   | Prostaglandin E receptor 4 (subtype EP4)                                            | 5  |
| PTK2B    | 2185   | PTK2B protein tyrosine kinase 2 beta                                                | 3  |
| PYCRL    | 65263  | Pyrroline-5-carboxylate reductase-like                                              | 13 |
| RAB3B    | 5865   | RAB3B, member RAS oncogene family                                                   | 5  |
| RAD54L   | 8438   | RAD54-like ( <i>S. cerevisiae</i> )                                                 | 5  |
| RERE     | 473    | Arginine-glutamic acid dipeptide (RE) repeats                                       | 5  |
| RET      | 5979   | Ret proto-oncogene                                                                  | 5  |
| RGS2     | 5997   | Regulator of G-protein signaling 2, 24kDa                                           | 5  |
| RIPK1    | 8737   | Receptor (TNFRSF)-interacting serine-threonine kinase 1                             | 5  |
| RNASEL   | 6041   | Ribonuclease L (2',5'-oligoadenylate synthetase-dependent)                          | 5  |
| RNPS1    | 10921  | RNA binding protein S1, serine-rich domain                                          | 5  |
| ROCK2    | 9475   | Rho-associated, coiled-coil containing protein kinase 2                             | 5  |
| ROS1     | 6098   | V-ros UR2 sarcoma virus oncogene homolog 1 (avian)                                  | 5  |
| RPS6KB2  | 6199   | Ribosomal protein S6 kinase, 70kDa, polypeptide 2                                   | 2  |
| SDCCAG10 | 10283  | Serologically defined colon cancer antigen 10                                       | 5  |
| SERPINA3 | 12     | Serpin peptidase inhibitor, clade A (alpha-1 antiproteinase, antitrypsin), member 3 | 4  |
| SERPINC1 | 462    | Serpin peptidase inhibitor, clade C (antithrombin), member 1                        | 5  |
| SF3A2    | 8175   | Splicing factor 3a, subunit 2, 66kDa                                                | 5  |
| SF3A3    | 10946  | Splicing factor 3a, subunit 3, 60kDa                                                | 5  |
| SF3B1    | 23451  | Splicing factor 3b, subunit 1, 155kDa                                               | 5  |
| SF3B3    | 23450  | Splicing factor 3b, subunit 3, 130kDa                                               | 5  |
| SF3B4    | 10262  | Splicing factor 3b, subunit 4, 49kDa                                                | 5  |

|         |        |                                                                                              |    |
|---------|--------|----------------------------------------------------------------------------------------------|----|
| SFRS10  | 6434   | Splicing factor, arginine/serine-rich 10 (transformer 2 homolog, Drosophila)                 | 5  |
| SFRS11  | 9295   | Splicing factor, arginine/serine-rich 11                                                     | 5  |
| SFRS2   | 6427   | Splicing factor, arginine/serine-rich 2                                                      | 31 |
| SFRS5   | 6430   | Splicing factor, arginine/serine-rich 5                                                      | 5  |
| SHFM3P1 | 26226  | split hand/foot malformation (                                                               | 4  |
| SHPRH   | 257218 | SNF2 histone linker PHD RING helicase                                                        | 5  |
| SIX5    | 147912 | SIX homeobox 5                                                                               | 3  |
| SIX6    | 4990   | SIX homeobox 6                                                                               | 5  |
| SKP1A   | 6500   | S-phase kinase-associated prot                                                               | 3  |
| SLK     | 9748   | STE20-like kinase (yeast)                                                                    | 5  |
| SMARCA4 | 6597   | SWI/SNF related, matrix associated, actin dependent regulator of chromatin, subfamily a,     | 5  |
| SMARCC1 | 6599   | SWI/SNF related, matrix associated, actin dependent regulator of chromatin, subfamily c,     | 5  |
| SMARCC2 | 6601   | SWI/SNF related, matrix associated, actin dependent regulator of chromatin, subfamily c,     | 4  |
| SMARCE1 | 6605   | SWI/SNF related, matrix associated, actin dependent regulator of chromatin, subfamily e,     | 5  |
| SNAI2   | 6591   | Snail homolog 2 (Drosophila)                                                                 | 5  |
| SNAPC5  | 10302  | Small nuclear RNA activating complex, polypeptide 5, 19kDa                                   | 5  |
| SNF8    | 11267  | SNF8, ESCRT-II complex subunit, homolog (S. cerevisiae)                                      | 5  |
| SNRP70  | 6625   | Small nuclear ribonucleoprotein 70kDa polypeptide (RNP antigen)                              | 5  |
| SOHLH2  | 54937  | Spermatogenesis and oogenesis specific basic helix-loop-helix 2                              | 4  |
| SOLH    | 6650   | Small optic lobes homolog (Drosophila)                                                       | 5  |
| SOX1    | 6656   | SRY (sex determining region Y)-box 1                                                         | 4  |
| SOX21   | 11166  | SRY (sex determining region Y)-box 21                                                        | 5  |
| SP140   | 11262  | SP140 nuclear body protein                                                                   | 5  |
| SPOCD1  | 90853  | SPOC domain containing 1                                                                     | 5  |
| SRMS    | 6725   | Src-related kinase lacking C-terminal regulatory tyrosine and N-terminal myristylation sites | 5  |
| SRRM1   | 10250  | Serine/arginine repetitive matrix 1                                                          | 5  |
| SRRM2   | 23524  | Serine/arginine repetitive matrix 2                                                          | 2  |
| STK11   | 6794   | Serine/threonine kinase 11                                                                   | 5  |
| STK16   | 8576   | Serine/threonine kinase 16                                                                   | 5  |
| STK17A  | 9263   | Serine/threonine kinase 17a                                                                  | 4  |
| STK17B  | 9262   | Serine/threonine kinase 17b                                                                  | 4  |
| STK24   | 8428   | Serine/threonine kinase 24 (STE20 homolog, yeast)                                            | 5  |
| STK39   | 27347  | Serine threonine kinase 39 (STE20/SPS1 homolog, yeast)                                       | 5  |
| SYT5    | 6861   | Synaptotagmin V                                                                              | 5  |
| TADA3L  | 10474  | Transcriptional adaptor 3 (NGG1 homolog, yeast)-like                                         | 5  |
| TAF5L   | 27097  | TAF5-like RNA polymerase II, p300/CBP-associated factor (PCAF)-associated factor, 65k        | 5  |
| TARDBP  | 23435  | TAR DNA binding protein                                                                      | 5  |
| TCERG1L | 256536 | Transcription elongation regulator 1-like                                                    | 5  |

|         |        |                                                                                         |   |
|---------|--------|-----------------------------------------------------------------------------------------|---|
| TCF19   | 6941   | Transcription factor 19 (SC1)                                                           | 5 |
| TCF20   | 6942   | Transcription factor 20 (AR1)                                                           | 5 |
| TCF21   | 6943   | Transcription factor 21                                                                 | 5 |
| TEAD1   | 7003   | TEA domain family member 1 (SV40 transcriptional enhancer factor)                       | 5 |
| TEAD3   | 7005   | TEA domain family member 3                                                              | 5 |
| TEAD4   | 7004   | TEA domain family member 4                                                              | 5 |
| TEF     | 7008   | Thyrotrophic embryonic factor                                                           | 5 |
| TEK     | 7010   | TEK tyrosine kinase, endothelial (venous malformations, multiple cutaneous and mucosal) | 5 |
| TGFBR2  | 7048   | Transforming growth factor, beta receptor II (70/80kDa)                                 | 5 |
| TGIF2LY | 90655  | TGFB-induced factor homeobox 2-like, Y-linked                                           | 5 |
| TGM2    | 7052   | Transglutaminase 2 (C polypeptide, protein-glutamine-gamma-glutamyltransferase)         | 5 |
| THBS1   | 7057   | Thrombospondin 1                                                                        | 5 |
| THOC1   | 9984   | THO complex 1                                                                           | 5 |
| THOC4   | 10189  | THO complex 4                                                                           | 4 |
| THOC5   | 8563   | THO complex 5                                                                           | 5 |
| TM4SF1  | 4071   | Transmembrane 4 L six family member 1                                                   | 5 |
| TMEPAI  | 56937  | Transmembrane, prostate androgen induced RNA                                            | 5 |
| TMPRSS2 | 7113   | Transmembrane protease, serine 2                                                        | 4 |
| TNK1    | 8711   | Tyrosine kinase, non-receptor, 1                                                        | 5 |
| TP73    | 7161   | Tumor protein p73                                                                       | 5 |
| TP73L   | 8626   | tumor protein p73-like                                                                  | 5 |
| TPRX1   | 284355 | Tetra-peptide repeat homeobox 1                                                         | 4 |
| TRIO    | 7204   | Triple functional domain (PTPRF interacting)                                            | 4 |
| TSHZ3   | 57616  | Teashirt zinc finger homeobox 3                                                         | 5 |
| ULK1    | 8408   | Unc-51-like kinase 1 (C. elegans)                                                       | 5 |
| ULK2    | 9706   | Unc-51-like kinase 2 (C. elegans)                                                       | 5 |
| VENTX   | 27287  | VENT homeobox homolog (Xenopus laevis)                                                  | 5 |
| VRK3    | 51231  | Vaccinia related kinase 3                                                               | 4 |
| WDR79   | 55135  | WD repeat domain 79                                                                     | 5 |
| WHSC1L1 | 54904  | Wolf-Hirschhorn syndrome candidate 1-like 1                                             | 5 |
| WNK1    | 65125  | WNK lysine deficient protein kinase 1                                                   | 5 |
| ZAP70   | 7535   | Zeta-chain (TCR) associated protein kinase 70kDa                                        | 5 |
| ZBTB3   | 79842  | Zinc finger and BTB domain containing 3                                                 | 5 |
| ZBTB32  | 27033  | Zinc finger and BTB domain containing 32                                                | 5 |
| ZBTB4   | 57659  | Zinc finger and BTB domain containing 4                                                 | 5 |
| ZBTB40  | 9923   | Zinc finger and BTB domain containing 40                                                | 5 |
| ZFP36L1 | 677    | Zinc finger protein 36, C3H type-like 1                                                 | 5 |
| ZMYM1   | 79830  | Zinc finger, MYM-type 1                                                                 | 5 |



|        |        |                                          |   |
|--------|--------|------------------------------------------|---|
| ZNF117 | 7670   | Zinc finger protein 117                  | 5 |
| ZNF132 | 7691   | Zinc finger protein 132                  | 5 |
| ZNF133 | 7692   | Zinc finger protein 133                  | 5 |
| ZNF134 | 7693   | Zinc finger protein 134                  | 5 |
| ZNF160 | 90338  | Zinc finger protein 160                  | 5 |
| ZNF222 | 7673   | zinc finger protein 222                  | 5 |
| ZNF285 | 26974  | zinc finger protein 285                  | 5 |
| ZNF420 | 147923 | Zinc finger protein 420                  | 5 |
| ZNF434 | 54925  | Zinc finger protein 434                  | 5 |
| ZNF439 | 90594  | Zinc finger protein 439                  | 5 |
| ZNF442 | 79973  | Zinc finger protein 442                  | 5 |
| ZNF471 | 57573  | Zinc finger protein 471                  | 4 |
| ZNF502 | 91392  | Zinc finger protein 502                  | 4 |
| ZNF524 | 147807 | Zinc finger protein 524                  | 5 |
| ZNF529 | 57711  | Zinc finger protein 529                  | 5 |
| ZNF547 | 284306 | zinc finger protein 547                  | 5 |
| ZNF548 | 147694 | zinc finger protein 548                  | 5 |
| ZNF552 | 79818  | Zinc finger protein 552                  | 5 |
| ZNF556 | 80032  | Zinc finger protein 556                  | 5 |
| ZNF560 | 147741 | Zinc finger protein 560                  | 5 |
| ZNF562 | 54811  | Zinc finger protein 562                  | 5 |
| ZNF563 | 147837 | Zinc finger protein 563                  | 5 |
| ZNF565 | 147929 | Zinc finger protein 565                  | 5 |
| ZNF569 | 148266 | Zinc finger protein 569                  | 5 |
| ZNF586 | 54807  | zinc finger protein 586                  | 5 |
| ZNF605 | 90462  | Zinc finger protein 605                  | 5 |
| ZNF625 | 90589  | zinc finger protein 625                  | 3 |
| ZNF672 | 79894  | Zinc finger protein 672                  | 5 |
| ZNF682 | 91120  | Zinc finger protein 682                  | 5 |
| ZNF702 | 79986  | Zinc finger protein 702                  | 5 |
| ZNF776 | 284309 | Zinc finger protein 776                  | 5 |
| ZNF777 | 27153  | Zinc finger protein 777                  | 5 |
| ZNF784 | 147808 | Zinc finger protein 784                  | 2 |
| ZNF85  | 7639   | Zinc finger protein 85                   | 5 |
| ZNF91  | 7644   | Zinc finger protein 91                   | 5 |
| ZSCAN1 | 284312 | Zinc finger and SCAN domain containing 1 | 4 |
| ZSCAN2 | 54993  | Zinc finger and SCAN domain containing 2 | 4 |

**POOL 4**

| <b>Symbol</b> | <b>NCBI Gene ID</b> | <b>Description</b>                                                                            | <b>Number of shRNAs</b> |
|---------------|---------------------|-----------------------------------------------------------------------------------------------|-------------------------|
| ABLIM3        | 22885               | Actin binding LIM protein family, member 3                                                    | 5                       |
| ADCK4         | 79934               | AarF domain containing kinase 4                                                               | 5                       |
| AKAP1         | 8165                | A kinase (PRKA) anchor protein 1                                                              | 4                       |
| ANKFN1        | 162282              | Ankyrin-repeat and fibronectin type III domain containing 1                                   | 5                       |
| ANXA6         | 309                 | Annexin A6                                                                                    | 3                       |
| ARID3A        | 1820                | AT rich interactive domain 3A (BRIGHT-like)                                                   | 4                       |
| ARID4A        | 5926                | AT rich interactive domain 4A (RBP1-like)                                                     | 5                       |
| ARIH1         | 25820               | Ariadne homolog, ubiquitin-conjugating enzyme E2 binding protein, 1 (Drosophila)              | 5                       |
| ATF2          | 1386                | Activating transcription factor 2                                                             | 5                       |
| ATG12         | 9140                | ATG12 autophagy related 12 homolog (S. cerevisiae)                                            | 5                       |
| ATOX1         | 475                 | ATX1 antioxidant protein 1 homolog (yeast)                                                    | 5                       |
| BAP1          | 8314                | BRCA1 associated protein-1 (ubiquitin carboxy-terminal hydrolase)                             | 5                       |
| BARX2         | 8538                | BARX homeobox 2                                                                               | 5                       |
| BAT3          | 7917                | HLA-B associated transcript 3                                                                 | 5                       |
| BAZ1B         | 9031                | Bromodomain adjacent to zinc finger domain, 1B                                                | 5                       |
| BCL6B         | 255877              | B-cell CLL/lymphoma 6, member B (zinc finger protein)                                         | 5                       |
| BCS1L         | 617                 | BCS1-like (yeast)                                                                             | 5                       |
| BHLHB2        | 8553                | Basic helix-loop-helix domain containing, class B, 2                                          | 5                       |
| BLZF1         | 8548                | Basic leucine zipper nuclear factor 1 (JEM-1)                                                 | 5                       |
| BPY2          | 9083                | basic charge, Y-linked, 2                                                                     | 5                       |
| BSG           | 682                 | Basigin (Ok blood group)                                                                      | 5                       |
| BTAF1         | 9044                | BTAF1 RNA polymerase II, B-TFIID transcription factor-associated, 170kDa (Mot1 homolog)       | 5                       |
| BTF3          | 689                 | Basic transcription factor 3                                                                  | 5                       |
| BTF3L1        | 690                 | Basic transcription factor 3, like 1                                                          | 5                       |
| BUD31         | 8896                | BUD31 homolog (S. cerevisiae)                                                                 | 5                       |
| C20orf86      | 140731              | chromosome 20 open reading fra                                                                | 4                       |
| C2orf3        | 6936                | Chromosome 2 open reading frame 3                                                             | 5                       |
| C5AR1         | 728                 | Complement component 5a receptor 1                                                            | 5                       |
| C7orf9        | 64111               | chromosome 7 open reading fram                                                                | 4                       |
| CACNA1A       | 773                 | Calcium channel, voltage-dependent, P/Q type, alpha 1A subunit                                | 4                       |
| CALCR         | 799                 | Calcitonin receptor                                                                           | 5                       |
| CALCRL        | 10203               | Calcitonin receptor-like                                                                      | 5                       |
| CART1         | 8092                | cartilage paired-class homeopr                                                                | 5                       |
| CASR          | 846                 | Calcium-sensing receptor (hypocalciuric hypercalcemia 1, severe neonatal hyperparathyroidism) | 5                       |
| CBFA2T2       | 9139                | Core-binding factor, runt domain, alpha subunit 2; translocated to, 2                         | 5                       |
| CCBP2         | 1238                | Chemokine binding protein 2                                                                   | 5                       |

|        |       |                                                                                                    |   |
|--------|-------|----------------------------------------------------------------------------------------------------|---|
| CCDC69 | 26112 | Coiled-coil domain containing 69                                                                   | 5 |
| CCKAR  | 886   | Cholecystokinin A receptor                                                                         | 3 |
| CCNT1  | 904   | Cyclin T1                                                                                          | 5 |
| CCNT2  | 905   | Cyclin T2                                                                                          | 5 |
| CCR1   | 1230  | Chemokine (C-C motif) receptor 1                                                                   | 5 |
| CCR3   | 1232  | Chemokine (C-C motif) receptor 3                                                                   | 5 |
| CCR4   | 1233  | Chemokine (C-C motif) receptor 4                                                                   | 5 |
| CCR5   | 1234  | Chemokine (C-C motif) receptor 5                                                                   | 5 |
| CCR6   | 1235  | Chemokine (C-C motif) receptor 6                                                                   | 5 |
| CCR7   | 1236  | Chemokine (C-C motif) receptor 7                                                                   | 5 |
| CCR8   | 1237  | Chemokine (C-C motif) receptor 8                                                                   | 5 |
| CCR9   | 10803 | Chemokine (C-C motif) receptor 9                                                                   | 5 |
| CCRL1  | 51554 | Chemokine (C-C motif) receptor-like 1                                                              | 5 |
| CCRL2  | 9034  | Chemokine (C-C motif) receptor-like 2                                                              | 5 |
| CD74   | 972   | CD74 molecule, major histocompatibility complex, class II invariant chain                          | 5 |
| CD97   | 976   | CD97 molecule                                                                                      | 5 |
| CDC23  | 8697  | Cell division cycle 23 homolog ( <i>S. cerevisiae</i> )                                            | 5 |
| CDC73  | 79577 | Cell division cycle 73, Paf1/RNA polymerase II complex component, homolog ( <i>S. cerevisiae</i> ) | 4 |
| CDX1   | 1044  | Caudal type homeobox 1                                                                             | 5 |
| CDX2   | 1045  | Caudal type homeobox 2                                                                             | 3 |
| CDX4   | 1046  | Caudal type homeobox 4                                                                             | 5 |
| CEBPD  | 1052  | CCAAT/enhancer binding protein (C/EBP), delta                                                      | 4 |
| CEBPE  | 1053  | CCAAT/enhancer binding protein (C/EBP), epsilon                                                    | 4 |
| CELSR1 | 9620  | Cadherin, EGF LAG seven-pass G-type receptor 1 (flamingo homolog, <i>Drosophila</i> )              | 4 |
| CELSR2 | 1952  | Cadherin, EGF LAG seven-pass G-type receptor 2 (flamingo homolog, <i>Drosophila</i> )              | 5 |
| CELSR3 | 1951  | Cadherin, EGF LAG seven-pass G-type receptor 3 (flamingo homolog, <i>Drosophila</i> )              | 3 |
| CHES1  | 1112  | checkpoint suppressor 1                                                                            | 5 |
| CHRM1  | 1128  | Cholinergic receptor, muscarinic 1                                                                 | 5 |
| CHRM2  | 1129  | Cholinergic receptor, muscarinic 2                                                                 | 3 |
| CHRM3  | 1131  | Cholinergic receptor, muscarinic 3                                                                 | 4 |
| CHRM4  | 1132  | Cholinergic receptor, muscarinic 4                                                                 | 5 |
| CHRM5  | 1133  | Cholinergic receptor, muscarinic 5                                                                 | 5 |
| CMKLR1 | 1240  | Chemokine-like receptor 1                                                                          | 5 |
| CNBP   | 7555  | CCHC-type zinc finger, nucleic acid binding protein                                                | 5 |
| CNOT2  | 4848  | CCR4-NOT transcription complex, subunit 2                                                          | 5 |
| CNOT3  | 4849  | CCR4-NOT transcription complex, subunit 3                                                          | 5 |
| CNOT4  | 4850  | CCR4-NOT transcription complex, subunit 4                                                          | 5 |
| CNOT8  | 9337  | CCR4-NOT transcription complex, subunit 8                                                          | 5 |

|         |       |                                                            |   |
|---------|-------|------------------------------------------------------------|---|
| CNR1    | 1268  | Cannabinoid receptor 1 (brain)                             | 5 |
| CNR2    | 1269  | Cannabinoid receptor 2 (macrophage)                        | 4 |
| CREBL1  | 1388  | cAMP responsive element bindin                             | 5 |
| CREG1   | 8804  | Cellular repressor of E1A-stimulated genes 1               | 5 |
| CREM    | 1390  | CAMP responsive element modulator                          | 4 |
| CRH     | 1392  | Corticotropin releasing hormone                            | 3 |
| CRHR1   | 1394  | Corticotropin releasing hormone receptor 1                 | 5 |
| CRHR2   | 1395  | Corticotropin releasing hormone receptor 2                 | 5 |
| CRX     | 1406  | Cone-rod homeobox                                          | 5 |
| CRY1    | 1407  | Cryptochrome 1 (photolyase-like)                           | 5 |
| CSDA    | 8531  | Cold shock domain protein A                                | 5 |
| CST1    | 1469  | Cystatin SN                                                | 4 |
| CST2    | 1470  | Cystatin SA                                                | 4 |
| CST3    | 1471  | Cystatin C (amyloid angiopathy and cerebral hemorrhage)    | 5 |
| CST4    | 1472  | Cystatin S                                                 | 4 |
| CSTA    | 1475  | Cystatin A (stefin A)                                      | 4 |
| CSTB    | 1476  | Cystatin B (stefin B)                                      | 5 |
| CTBP1   | 1487  | C-terminal binding protein 1                               | 5 |
| CTBP2   | 1488  | C-terminal binding protein 2                               | 5 |
| CTCF    | 10664 | CCCTC-binding factor (zinc finger protein)                 | 5 |
| CTRB1   | 1504  | Chymotrypsinogen B1                                        | 5 |
| CUTL1   | 1523  | cut-like 1, CCAAT displacement                             | 5 |
| CX3CR1  | 1524  | Chemokine (C-X3-C motif) receptor 1                        | 5 |
| CXCR3   | 2833  | Chemokine (C-X-C motif) receptor 3                         | 5 |
| CXCR6   | 10663 | Chemokine (C-X-C motif) receptor 6                         | 5 |
| CXCR7   | 57007 | Chemokine (C-X-C motif) receptor 7                         | 5 |
| CYSLTR1 | 10800 | Cysteinyl leukotriene receptor 1                           | 5 |
| CYSLTR2 | 57105 | Cysteinyl leukotriene receptor 2                           | 5 |
| DBP     | 1628  | D site of albumin promoter (albumin D-box) binding protein | 4 |
| DCTN4   | 51164 | Dynactin 4 (p62)                                           | 5 |
| DDI2    | 84301 | DDI1, DNA-damage inducible 1, homolog 2 (S. cerevisiae)    | 5 |
| DEK     | 7913  | DEK oncogene (DNA binding)                                 | 5 |
| DIDO1   | 11083 | Death inducer-obliterator 1                                | 5 |
| DLX1    | 1745  | Distal-less homeobox 1                                     | 4 |
| DLX2    | 1746  | Distal-less homeobox 2                                     | 4 |
| DLX3    | 1747  | Distal-less homeobox 3                                     | 5 |
| DLX4    | 1748  | Distal-less homeobox 4                                     | 4 |
| DMRT1   | 1761  | Doublesex and mab-3 related transcription factor 1         | 5 |

|       |       |                                                                                    |   |
|-------|-------|------------------------------------------------------------------------------------|---|
| DPF1  | 8193  | D4, zinc and double PHD fingers family 1                                           | 4 |
| DPF2  | 5977  | D4, zinc and double PHD fingers family 2                                           | 4 |
| DPF3  | 8110  | D4, zinc and double PHD fingers, family 3                                          | 5 |
| DR1   | 1810  | Down-regulator of transcription 1, TBP-binding (negative cofactor 2)               | 5 |
| DRD1  | 1812  | Dopamine receptor D1                                                               | 5 |
| DRD2  | 1813  | Dopamine receptor D2                                                               | 5 |
| DRD3  | 1814  | Dopamine receptor D3                                                               | 4 |
| DRD4  | 1815  | Dopamine receptor D4                                                               | 5 |
| DRD5  | 1816  | Dopamine receptor D5                                                               | 3 |
| DUX1  | 26584 | Double homeobox, 1                                                                 | 5 |
| DUX2  | 26583 | double homeobox, 2                                                                 | 3 |
| E2F2  | 1870  | E2F transcription factor 2                                                         | 4 |
| E2F3  | 1871  | E2F transcription factor 3                                                         | 5 |
| E2F4  | 1874  | E2F transcription factor 4, p107/p130-binding                                      | 4 |
| E2F5  | 1875  | E2F transcription factor 5, p130-binding                                           | 5 |
| E2F6  | 1876  | E2F transcription factor 6                                                         | 5 |
| E4F1  | 1877  | E4F transcription factor 1                                                         | 5 |
| EBF1  | 1879  | Early B-cell factor 1                                                              | 5 |
| EBI2  | 1880  | Epstein-Barr virus induced gene 2 (lymphocyte-specific G protein-coupled receptor) | 5 |
| EDF1  | 8721  | Endothelial differentiation-related factor 1                                       | 5 |
| EDG1  | 1901  | Endothelial differentiation, sphingolipid G-protein-coupled receptor, 1            | 3 |
| EDG2  | 1902  | Endothelial differentiation, lysophosphatidic acid G-protein-coupled receptor, 2   | 4 |
| EDG3  | 1903  | Endothelial differentiation, sphingolipid G-protein-coupled receptor, 3            | 5 |
| EDG4  | 9170  | Endothelial differentiation, lysophosphatidic acid G-protein-coupled receptor, 4   | 5 |
| EDG5  | 9294  | Endothelial differentiation, sphingolipid G-protein-coupled receptor, 5            | 4 |
| EDG6  | 8698  | Endothelial differentiation, lysophosphatidic acid G-protein-coupled receptor, 6   | 4 |
| EDG7  | 23566 | Endothelial differentiation, lysophosphatidic acid G-protein-coupled receptor, 7   | 4 |
| EDNRA | 1909  | Endothelin receptor type A                                                         | 5 |
| EDNRB | 1910  | Endothelin receptor type B                                                         | 4 |
| EGR1  | 1958  | Early growth response 1                                                            | 5 |
| EGR2  | 1959  | Early growth response 2 (Krox-20 homolog, Drosophila)                              | 5 |
| EGR3  | 1960  | Early growth response 3                                                            | 5 |
| EGR4  | 1961  | Early growth response 4                                                            | 4 |
| ELF1  | 1997  | E74-like factor 1 (ets domain transcription factor)                                | 4 |
| ELF2  | 1998  | E74-like factor 2 (ets domain transcription factor)                                | 5 |
| ELF3  | 1999  | E74-like factor 3 (ets domain transcription factor, epithelial-specific )          | 5 |
| ELF4  | 2000  | E74-like factor 4 (ets domain transcription factor)                                | 5 |
| ELF5  | 2001  | E74-like factor 5 (ets domain transcription factor)                                | 4 |

|          |        |                                                                                        |   |
|----------|--------|----------------------------------------------------------------------------------------|---|
| ELK3     | 2004   | ELK3, ETS-domain protein (SRF accessory protein 2)                                     | 5 |
| ELK4     | 2005   | ELK4, ETS-domain protein (SRF accessory protein 1)                                     | 5 |
| ELOVL4   | 6785   | Elongation of very long chain fatty acids (FEN1/Elo2, SUR4/Elo3, yeast)-like 4         | 5 |
| EMR1     | 2015   | Egf-like module containing, mucin-like, hormone receptor-like 1                        | 5 |
| EMR2     | 30817  | Egf-like module containing, mucin-like, hormone receptor-like 2                        | 5 |
| EMX1     | 2016   | Empty spiracles homeobox 1                                                             | 4 |
| EMX2     | 2018   | Empty spiracles homeobox 2                                                             | 5 |
| EN1      | 2019   | Engrailed homeobox 1                                                                   | 5 |
| EN2      | 2020   | Engrailed homeobox 2                                                                   | 5 |
| EOMES    | 8320   | Eomesodermin homolog ( <i>Xenopus laevis</i> )                                         | 4 |
| ERF      | 2077   | Ets2 repressor factor                                                                  | 5 |
| ERG      | 2078   | V-ets erythroblastosis virus E26 oncogene homolog (avian)                              | 5 |
| ETS2     | 2114   | V-ets erythroblastosis virus E26 oncogene homolog 2 (avian)                            | 5 |
| ETV1     | 2115   | Ets variant gene 1                                                                     | 5 |
| ETV3     | 2117   | Ets variant gene 3                                                                     | 5 |
| ETV4     | 2118   | Ets variant gene 4 (E1A enhancer binding protein, E1AF)                                | 5 |
| ETV5     | 2119   | Ets variant gene 5 (ets-related molecule)                                              | 5 |
| EVX1     | 2128   | Even-skipped homeobox 1                                                                | 5 |
| F10      | 2159   | Coagulation factor X                                                                   | 4 |
| F11      | 2160   | Coagulation factor XI (plasma thromboplastin antecedent)                               | 5 |
| F12      | 2161   | Coagulation factor XII (Hageman factor)                                                | 5 |
| F2RL1    | 2150   | Coagulation factor II (thrombin) receptor-like 1                                       | 5 |
| F2RL2    | 2151   | Coagulation factor II (thrombin) receptor-like 2                                       | 5 |
| F7       | 2155   | Coagulation factor VII (serum prothrombin conversion accelerator)                      | 5 |
| F9       | 2158   | Coagulation factor IX (plasma thromboplastic component, Christmas disease, hemophilia) | 5 |
| FAP      | 2191   | Fibroblast activation protein, alpha                                                   | 5 |
| FAT2     | 2196   | FAT tumor suppressor homolog 2 ( <i>Drosophila</i> )                                   | 5 |
| FBXO15   | 201456 | F-box protein 15                                                                       | 4 |
| FEV      | 54738  | FEV (ETS oncogene family)                                                              | 5 |
| FFAR2    | 2867   | Free fatty acid receptor 2                                                             | 5 |
| FFAR3    | 2865   | Free fatty acid receptor 3                                                             | 5 |
| FJX1     | 24147  | Four jointed box 1 ( <i>Drosophila</i> )                                               | 4 |
| FLJ36748 | 134265 | hypothetical protein FLJ36748                                                          | 3 |
| FOLH1    | 2346   | Folate hydrolase (prostate-specific membrane antigen) 1                                | 5 |
| FOXA1    | 3169   | Forkhead box A1                                                                        | 5 |
| FOXA2    | 3170   | Forkhead box A2                                                                        | 4 |
| FOXA3    | 3171   | Forkhead box A3                                                                        | 5 |
| FOXC1    | 2296   | Forkhead box C1                                                                        | 5 |

|          |        |                                                           |   |
|----------|--------|-----------------------------------------------------------|---|
| FOXD1    | 2297   | Forkhead box D1                                           | 4 |
| FOXE3    | 2301   | Forkhead box E3                                           | 3 |
| FOXF1    | 2294   | Forkhead box F1                                           | 5 |
| FOXF2    | 2295   | Forkhead box F2                                           | 4 |
| FOXG1B   | 2290   | forkhead box G1B                                          | 5 |
| FOXH1    | 8928   | Forkhead box H1                                           | 4 |
| FOXI1    | 2299   | Forkhead box I1                                           | 4 |
| FOXJ1    | 2302   | Forkhead box J1                                           | 5 |
| FOXL1    | 2300   | Forkhead box L1                                           | 5 |
| FOXN1    | 8456   | Forkhead box N1                                           | 5 |
| FRZB     | 2487   | Frizzled-related protein                                  | 5 |
| FUBP1    | 8880   | Far upstream element (FUSE) binding protein 1             | 5 |
| G3BP     | 10146  | Ras-GTPase-activating protein                             | 5 |
| GABBR2   | 9568   | Gamma-aminobutyric acid (GABA) B receptor, 2              | 5 |
| GALR3    | 8484   | Galanin receptor 3                                        | 2 |
| GAS7     | 8522   | Growth arrest-specific 7                                  | 5 |
| GATAD2B  | 57459  | GATA zinc finger domain containing 2B                     | 5 |
| GCM1     | 8521   | Glial cells missing homolog 1 (Drosophila)                | 5 |
| GFI1B    | 8328   | Growth factor independent 1B transcription repressor      | 5 |
| GLIPR1L1 | 256710 | GLI pathogenesis-related 1 like 1                         | 5 |
| GLRA1    | 2741   | Glycine receptor, alpha 1 (startle disease/hyperekplexia) | 4 |
| GM2A     | 2760   | GM2 ganglioside activator                                 | 5 |
| GNRHR2   | 114814 | Gonadotropin-releasing hormone (type 2) receptor 2        | 5 |
| GPBAR1   | 151306 | G protein-coupled bile acid receptor 1                    | 5 |
| GPR1     | 2825   | G protein-coupled receptor 1                              | 5 |
| GPR101   | 83550  | G protein-coupled receptor 101                            | 5 |
| GPR103   | 84109  | G protein-coupled receptor 103                            | 5 |
| GPR109B  | 8843   | G protein-coupled receptor 109B                           | 5 |
| GPR110   | 266977 | G protein-coupled receptor 110                            | 5 |
| GPR111   | 222611 | G protein-coupled receptor 111                            | 5 |
| GPR112   | 139378 | G protein-coupled receptor 112                            | 5 |
| GPR113   | 165082 | G protein-coupled receptor 113                            | 5 |
| GPR114   | 221188 | G protein-coupled receptor 114                            | 5 |
| GPR115   | 221393 | G protein-coupled receptor 115                            | 5 |
| GPR116   | 221395 | G protein-coupled receptor 116                            | 5 |
| GPR120   | 338557 | G protein-coupled receptor 120                            | 4 |
| GPR123   | 84435  | G protein-coupled receptor 123                            | 5 |
| GPR124   | 25960  | G protein-coupled receptor 124                            | 5 |

|        |        |                                                         |   |
|--------|--------|---------------------------------------------------------|---|
| GPR126 | 57211  | G protein-coupled receptor 126                          | 5 |
| GPR133 | 283383 | G protein-coupled receptor 133                          | 4 |
| GPR135 | 64582  | G protein-coupled receptor 135                          | 4 |
| GPR141 | 353345 | G protein-coupled receptor 141                          | 5 |
| GPR143 | 4935   | G protein-coupled receptor 143                          | 3 |
| GPR144 | 347088 | G protein-coupled receptor 144                          | 5 |
| GPR146 | 115330 | G protein-coupled receptor 146                          | 5 |
| GPR150 | 285601 | G protein-coupled receptor 150                          | 5 |
| GPR151 | 134391 | G protein-coupled receptor 151                          | 5 |
| GPR160 | 26996  | G protein-coupled receptor 160                          | 5 |
| GPR161 | 23432  | G protein-coupled receptor 161                          | 5 |
| GPR162 | 27239  | G protein-coupled receptor 162                          | 4 |
| GPR171 | 29909  | G protein-coupled receptor 171                          | 5 |
| GPR173 | 54328  | G protein-coupled receptor 173                          | 5 |
| GPR175 | 131601 | G protein-coupled receptor 175                          | 3 |
| GPR176 | 11245  | G protein-coupled receptor 176                          | 5 |
| GPR25  | 2848   | G protein-coupled receptor 25                           | 5 |
| GPR4   | 2828   | G protein-coupled receptor 4                            | 5 |
| GPR42  | 2866   | G protein-coupled receptor 42                           | 5 |
| GPR44  | 11251  | G protein-coupled receptor 44                           | 5 |
| GPR50  | 9248   | G protein-coupled receptor 50                           | 5 |
| GPR52  | 9293   | G protein-coupled receptor 52                           | 5 |
| GPR55  | 9290   | G protein-coupled receptor 55                           | 5 |
| GPR56  | 9289   | G protein-coupled receptor 56                           | 5 |
| GPR61  | 83873  | G protein-coupled receptor 61                           | 5 |
| GPR62  | 118442 | G protein-coupled receptor 62                           | 5 |
| GPR63  | 81491  | G protein-coupled receptor 63                           | 5 |
| GPR64  | 10149  | G protein-coupled receptor 64                           | 5 |
| GPR65  | 8477   | G protein-coupled receptor 65                           | 5 |
| GPR68  | 8111   | G protein-coupled receptor 68                           | 5 |
| GPR89A | 51463  | G protein-coupled receptor 89A                          | 5 |
| GPR98  | 84059  | G protein-coupled receptor 98                           | 5 |
| GPRC5B | 51704  | G protein-coupled receptor, family C, group 5, member B | 5 |
| GPRC5C | 55890  | G protein-coupled receptor, family C, group 5, member C | 5 |
| GPRC6A | 222545 | G protein-coupled receptor, family C, group 6, member A | 5 |
| GPX3   | 2878   | Glutathione peroxidase 3 (plasma)                       | 5 |
| GRM1   | 2911   | Glutamate receptor, metabotropic 1                      | 5 |
| GRM2   | 2912   | Glutamate receptor, metabotropic 2                      | 4 |



|        |        |                                                           |   |
|--------|--------|-----------------------------------------------------------|---|
| GRM3   | 2913   | Glutamate receptor, metabotropic 3                        | 4 |
| GRM4   | 2914   | Glutamate receptor, metabotropic 4                        | 4 |
| GRM5   | 2915   | Glutamate receptor, metabotropic 5                        | 5 |
| GRM6   | 2916   | Glutamate receptor, metabotropic 6                        | 5 |
| GRM7   | 2917   | Glutamate receptor, metabotropic 7                        | 5 |
| GRM8   | 2918   | Glutamate receptor, metabotropic 8                        | 5 |
| GRPEL2 | 134266 | GrpE-like 2, mitochondrial (E. coli)                      | 5 |
| GRPR   | 2925   | Gastrin-releasing peptide receptor                        | 5 |
| GTF3C3 | 9330   | General transcription factor III C, polypeptide 3, 102kDa | 5 |
| GTF3C4 | 9329   | General transcription factor III C, polypeptide 4, 90kDa  | 5 |
| GTF3C5 | 9328   | General transcription factor III C, polypeptide 5, 63kDa  | 5 |
| HAND1  | 9421   | Heart and neural crest derivatives expressed 1            | 5 |
| HAND2  | 9464   | Heart and neural crest derivatives expressed 2            | 5 |
| HBP1   | 26959  | HMG-box transcription factor 1                            | 5 |
| HCLS1  | 3059   | Hematopoietic cell-specific Lyn substrate 1               | 5 |
| HCRTR2 | 3062   | Hypocretin (orexin) receptor 2                            | 4 |
| HEAB   | 10978  | ATP/GTP-binding protein                                   | 5 |
| HERC2  | 8924   | Hect domain and RLD 2                                     | 5 |
| HESX1  | 8820   | HESX homeobox 1                                           | 5 |
| HHEX   | 3087   | Hematopoietically expressed homeobox                      | 5 |
| HIC1   | 3090   | Hypermethylated in cancer 1                               | 5 |
| HLF    | 3131   | Hepatic leukemia factor                                   | 5 |
| HLX1   | 3142   | H2.0-like homeo box 1 (Drosoph                            | 5 |
| HLXB9  | 3110   | homeo box HB9                                             | 4 |
| HMBOX1 | 79618  | Homeobox containing 1                                     | 5 |
| HMX1   | 3166   | H6 family homeobox 1                                      | 3 |
| HOXA1  | 3198   | Homeobox A1                                               | 4 |
| HOXA10 | 3206   | Homeobox A10                                              | 5 |
| HOXA11 | 3207   | Homeobox A11                                              | 3 |
| HOXA2  | 3199   | Homeobox A2                                               | 5 |
| HOXA7  | 3204   | Homeobox A7                                               | 5 |
| HOXA9  | 3205   | Homeobox A9                                               | 4 |
| HRH1   | 3269   | Histamine receptor H1                                     | 4 |
| HRH2   | 3274   | Histamine receptor H2                                     | 4 |
| HRH3   | 11255  | Histamine receptor H3                                     | 5 |
| HRH4   | 59340  | Histamine receptor H4                                     | 5 |
| HTR1A  | 3350   | 5-hydroxytryptamine (serotonin) receptor 1A               | 5 |
| HTR1B  | 3351   | 5-hydroxytryptamine (serotonin) receptor 1B               | 3 |

|         |        |                                                                                  |   |
|---------|--------|----------------------------------------------------------------------------------|---|
| HTR1F   | 3355   | 5-hydroxytryptamine (serotonin) receptor 1F                                      | 5 |
| HTR2A   | 3356   | 5-hydroxytryptamine (serotonin) receptor 2A                                      | 5 |
| HTR2B   | 3357   | 5-hydroxytryptamine (serotonin) receptor 2B                                      | 5 |
| HTR2C   | 3358   | 5-hydroxytryptamine (serotonin) receptor 2C                                      | 5 |
| HTR3A   | 3359   | 5-hydroxytryptamine (serotonin) receptor 3A                                      | 5 |
| HTR3B   | 9177   | 5-hydroxytryptamine (serotonin) receptor 3B                                      | 5 |
| HTR4    | 3360   | 5-hydroxytryptamine (serotonin) receptor 4                                       | 5 |
| HTR5A   | 3361   | 5-hydroxytryptamine (serotonin) receptor 5A                                      | 4 |
| HTR7    | 3363   | 5-hydroxytryptamine (serotonin) receptor 7 (adenylate cyclase-coupled)           | 5 |
| IL17B   | 27190  | Interleukin 17B                                                                  | 4 |
| IL8RA   | 3577   | Interleukin 8 receptor, alpha                                                    | 5 |
| IL8RB   | 3579   | Interleukin 8 receptor, beta                                                     | 5 |
| ILF2    | 3608   | Interleukin enhancer binding factor 2, 45kDa                                     | 5 |
| ILF3    | 3609   | Interleukin enhancer binding factor 3, 90kDa                                     | 5 |
| INSM1   | 3642   | Insulinoma-associated 1                                                          | 5 |
| IPF1    | 3651   | insulin promoter factor 1, hom                                                   | 5 |
| IRF1    | 3659   | Interferon regulatory factor 1                                                   | 5 |
| IRF2    | 3660   | Interferon regulatory factor 2                                                   | 5 |
| IRF4    | 3662   | Interferon regulatory factor 4                                                   | 5 |
| IRF5    | 3663   | Interferon regulatory factor 5                                                   | 5 |
| IRF6    | 3664   | Interferon regulatory factor 6                                                   | 5 |
| IRF7    | 3665   | Interferon regulatory factor 7                                                   | 3 |
| ISL1    | 3670   | ISL LIM homeobox 1                                                               | 5 |
| JARID1A | 5927   | Jumonji, AT rich interactive domain 1A                                           | 5 |
| JARID1B | 10765  | Jumonji, AT rich interactive domain 1B                                           | 4 |
| JUNB    | 3726   | Jun B proto-oncogene                                                             | 5 |
| JUND    | 3727   | Jun D proto-oncogene                                                             | 3 |
| KHSRP   | 8570   | KH-type splicing regulatory protein (FUSE binding protein 2)                     | 5 |
| KISS1R  | 84634  | KISS1 receptor                                                                   | 4 |
| KLF11   | 8462   | Kruppel-like factor 11                                                           | 4 |
| KLF5    | 688    | Kruppel-like factor 5 (intestinal)                                               | 5 |
| KLF6    | 1316   | Kruppel-like factor 6                                                            | 4 |
| KLF7    | 8609   | Kruppel-like factor 7 (ubiquitous)                                               | 5 |
| KLF9    | 687    | Kruppel-like factor 9                                                            | 4 |
| LANCL1  | 10314  | LanC lantibiotic synthetase component C-like 1 (bacterial)                       | 5 |
| LCORL   | 254251 | Ligand dependent nuclear receptor corepressor-like                               | 5 |
| LEO1    | 123169 | Leo1, Paf1/RNA polymerase II complex component, homolog ( <i>S. cerevisiae</i> ) | 5 |
| LGR5    | 8549   | Leucine-rich repeat-containing G protein-coupled receptor 5                      | 5 |

|           |        |                                                                                          |   |
|-----------|--------|------------------------------------------------------------------------------------------|---|
| LHCGR     | 3973   | Luteinizing hormone/choriogonadotropin receptor                                          | 3 |
| LHX1      | 3975   | LIM homeobox 1                                                                           | 5 |
| LHX2      | 9355   | LIM homeobox 2                                                                           | 4 |
| LHX3      | 8022   | LIM homeobox 3                                                                           | 4 |
| LMO1      | 4004   | LIM domain only 1 (rhombotin 1)                                                          | 4 |
| LMO4      | 8543   | LIM domain only 4                                                                        | 5 |
| LOC202201 | 202201 | similar to Transcription initi                                                           | 5 |
| LOC220594 | 220594 | TL132 protein                                                                            | 5 |
| LPHN1     | 22859  | Latrophilin 1                                                                            | 4 |
| LPHN2     | 23266  | Latrophilin 2                                                                            | 5 |
| LPHN3     | 23284  | Latrophilin 3                                                                            | 3 |
| LRRFIP1   | 9208   | Leucine rich repeat (in FLII) interacting protein 1                                      | 5 |
| LTB4R     | 1241   | Leukotriene B4 receptor                                                                  | 5 |
| LTB4R2    | 56413  | Leukotriene B4 receptor 2                                                                | 2 |
| LZTFL1    | 54585  | Leucine zipper transcription factor-like 1                                               | 5 |
| MAFG      | 4097   | V-maf musculoaponeurotic fibrosarcoma oncogene homolog G (avian)                         | 4 |
| MAFK      | 7975   | V-maf musculoaponeurotic fibrosarcoma oncogene homolog K (avian)                         | 5 |
| MAP3K7IP3 | 257397 | Mitogen-activated protein kinase kinase kinase 7 interacting protein 3                   | 5 |
| MAS1      | 4142   | MAS1 oncogene                                                                            | 5 |
| MAS1L     | 116511 | MAS1 oncogene-like                                                                       | 5 |
| MBD2      | 8932   | Methyl-CpG binding domain protein 2                                                      | 5 |
| MBD4      | 8930   | Methyl-CpG binding domain protein 4                                                      | 5 |
| MBTPS1    | 8720   | Membrane-bound transcription factor peptidase, site 1                                    | 5 |
| MC1R      | 4157   | Melanocortin 1 receptor (alpha melanocyte stimulating hormone receptor)                  | 5 |
| MC2R      | 4158   | Melanocortin 2 receptor (adrenocorticotropic hormone)                                    | 5 |
| MC3R      | 4159   | Melanocortin 3 receptor                                                                  | 5 |
| MC4R      | 4160   | Melanocortin 4 receptor                                                                  | 5 |
| MC5R      | 4161   | Melanocortin 5 receptor                                                                  | 5 |
| MCHR2     | 84539  | Melanin-concentrating hormone receptor 2                                                 | 5 |
| MGC20470  | 143630 | hypothetical protein MGC20470                                                            | 5 |
| MLL2      | 8085   | Myeloid/lymphoid or mixed-lineage leukemia 2                                             | 5 |
| MLLT10    | 8028   | Myeloid/lymphoid or mixed-lineage leukemia (trithorax homolog, Drosophila); translocated | 4 |
| MORF4     | 10934  | Mortality factor 4                                                                       | 3 |
| MRGPRF    | 219928 | MAS-related GPR, member F                                                                | 5 |
| MRGPRX1   | 259249 | MAS-related GPR, member X1                                                               | 4 |
| MRGPRX2   | 117194 | MAS-related GPR, member X2                                                               | 5 |
| MRGPRX4   | 117196 | MAS-related GPR, member X4                                                               | 4 |
| MSC       | 9242   | Musculin (activated B-cell factor-1)                                                     | 4 |

|        |       |                                                                                    |   |
|--------|-------|------------------------------------------------------------------------------------|---|
| MST150 | 85027 | MSTP150                                                                            | 3 |
| MTA1   | 9112  | Metastasis associated 1                                                            | 5 |
| MTA2   | 9219  | Metastasis associated 1 family, member 2                                           | 5 |
| MTNR1A | 4543  | Melatonin receptor 1A                                                              | 4 |
| MTNR1B | 4544  | Melatonin receptor 1B                                                              | 5 |
| MYOZ3  | 91977 | Myozenin 3                                                                         | 5 |
| MYST3  | 7994  | MYST histone acetyltransferase (monocytic leukemia) 3                              | 4 |
| NDST1  | 3340  | N-deacetylase/N-sulfotransferase (heparan glucosaminyl) 1                          | 4 |
| NEDD4  | 4734  | Neural precursor cell expressed, developmentally down-regulated 4                  | 5 |
| NES    | 10763 | Nestin                                                                             | 5 |
| NFATC3 | 4775  | Nuclear factor of activated T-cells, cytoplasmic, calcineurin-dependent 3          | 5 |
| NFATC4 | 4776  | Nuclear factor of activated T-cells, cytoplasmic, calcineurin-dependent 4          | 5 |
| NFE2   | 4778  | Nuclear factor (erythroid-derived 2), 45kDa                                        | 5 |
| NFE2L1 | 4779  | Nuclear factor (erythroid-derived 2)-like 1                                        | 5 |
| NFE2L2 | 4780  | Nuclear factor (erythroid-derived 2)-like 2                                        | 5 |
| NFIB   | 4781  | Nuclear factor I/B                                                                 | 5 |
| NFIC   | 4782  | Nuclear factor I/C (CCAAT-binding transcription factor)                            | 5 |
| NFIL3  | 4783  | Nuclear factor, interleukin 3 regulated                                            | 5 |
| NFIX   | 4784  | Nuclear factor I/X (CCAAT-binding transcription factor)                            | 5 |
| NFRKB  | 4798  | Nuclear factor related to kappaB binding protein                                   | 4 |
| NFX1   | 4799  | Nuclear transcription factor, X-box binding 1                                      | 5 |
| NFYA   | 4800  | Nuclear transcription factor Y, alpha                                              | 5 |
| NFYB   | 4801  | Nuclear transcription factor Y, beta                                               | 5 |
| NFYC   | 4802  | Nuclear transcription factor Y, gamma                                              | 5 |
| NHLH1  | 4807  | Nescient helix loop helix 1                                                        | 3 |
| NHLH2  | 4808  | Nescient helix loop helix 2                                                        | 5 |
| NKX2-5 | 1482  | NK2 transcription factor related, locus 5 (Drosophila)                             | 5 |
| NMBR   | 4829  | Neuromedin B receptor                                                              | 5 |
| NMUR2  | 56923 | Neuromedin U receptor 2                                                            | 4 |
| NPAS1  | 4861  | Neuronal PAS domain protein 1                                                      | 5 |
| NPBWR1 | 2831  | Neuropeptides B/W receptor 1                                                       | 4 |
| NPFFR1 | 64106 | Neuropeptide FF receptor 1                                                         | 5 |
| NPR1   | 4881  | Natriuretic peptide receptor A/guanylate cyclase A (atriuretic peptide receptor A) | 5 |
| NPR3   | 4883  | Natriuretic peptide receptor C/guanylate cyclase C (atriuretic peptide receptor C) | 5 |
| NPY    | 4852  | Neuropeptide Y                                                                     | 3 |
| NPY1R  | 4886  | Neuropeptide Y receptor Y1                                                         | 5 |
| NPY2R  | 4887  | Neuropeptide Y receptor Y2                                                         | 4 |
| NPY5R  | 4889  | Neuropeptide Y receptor Y5                                                         | 5 |

|         |        |                                                                          |   |
|---------|--------|--------------------------------------------------------------------------|---|
| NTSR1   | 4923   | Neurotensin receptor 1 (high affinity)                                   | 5 |
| NTSR2   | 23620  | Neurotensin receptor 2                                                   | 5 |
| ONECUT1 | 3175   | One cut homeobox 1                                                       | 5 |
| OPN1LW  | 5956   | Opsin 1 (cone pigments), long-wave-sensitive (color blindness, protan)   | 5 |
| OPN1MW  | 2652   | Opsin 1 (cone pigments), medium-wave-sensitive (color blindness, deutan) | 5 |
| OPN1SW  | 611    | Opsin 1 (cone pigments), short-wave-sensitive (color blindness, tritan)  | 5 |
| OPN3    | 23596  | Opsin 3 (encephalopsin, panopsin)                                        | 4 |
| OPN4    | 94233  | Opsin 4 (melanopsin)                                                     | 5 |
| OPN5    | 221391 | Opsin 5                                                                  | 5 |
| OPRD1   | 4985   | Opioid receptor, delta 1                                                 | 5 |
| OPRK1   | 4986   | Opioid receptor, kappa 1                                                 | 4 |
| OPRL1   | 4987   | Opiate receptor-like 1                                                   | 5 |
| OPRM1   | 4988   | Opioid receptor, mu 1                                                    | 2 |
| OR10H1  | 26539  | Olfactory receptor, family 10, subfamily H, member 1                     | 4 |
| OR10H2  | 26538  | Olfactory receptor, family 10, subfamily H, member 2                     | 5 |
| OR10H3  | 26532  | Olfactory receptor, family 10, subfamily H, member 3                     | 5 |
| OR10J1  | 26476  | Olfactory receptor, family 10, subfamily J, member 1                     | 5 |
| OR11A1  | 26531  | Olfactory receptor, family 11, subfamily A, member 1                     | 5 |
| OR12D2  | 26529  | Olfactory receptor, family 12, subfamily D, member 2                     | 5 |
| OR12D3  | 81797  | Olfactory receptor, family 12, subfamily D, member 3                     | 5 |
| OR1A1   | 8383   | Olfactory receptor, family 1, subfamily A, member 1                      | 5 |
| OR1A2   | 26189  | Olfactory receptor, family 1, subfamily A, member 2                      | 5 |
| OR1D2   | 4991   | Olfactory receptor, family 1, subfamily D, member 2                      | 5 |
| OR1E1   | 8387   | Olfactory receptor, family 1, subfamily E, member 1                      | 5 |
| OR1E2   | 8388   | Olfactory receptor, family 1, subfamily E, member 2                      | 5 |
| OR1F1   | 4992   | Olfactory receptor, family 1, subfamily F, member 1                      | 5 |
| OR1G1   | 8390   | Olfactory receptor, family 1, subfamily G, member 1                      | 5 |
| OR2A4   | 79541  | Olfactory receptor, family 2, subfamily A, member 4                      | 5 |
| OR2B2   | 81697  | Olfactory receptor, family 2, subfamily B, member 2                      | 5 |
| OR2C1   | 4993   | Olfactory receptor, family 2, subfamily C, member 1                      | 5 |
| OR2F1   | 26211  | Olfactory receptor, family 2, subfamily F, member 1                      | 4 |
| OR2H1   | 26716  | Olfactory receptor, family 2, subfamily H, member 1                      | 5 |
| OR2H2   | 7932   | Olfactory receptor, family 2, subfamily H, member 2                      | 3 |
| OR2J2   | 26707  | Olfactory receptor, family 2, subfamily J, member 2                      | 5 |
| OR2L13  | 284521 | Olfactory receptor, family 2, subfamily L, member 13                     | 5 |
| OR2S2   | 56656  | Olfactory receptor, family 2, subfamily S, member 2                      | 5 |
| OR2W1   | 26692  | Olfactory receptor, family 2, subfamily W, member 1                      | 5 |
| OR3A1   | 4994   | Olfactory receptor, family 3, subfamily A, member 1                      | 5 |

|          |        |                                                                      |   |
|----------|--------|----------------------------------------------------------------------|---|
| OR3A2    | 4995   | Olfactory receptor, family 3, subfamily A, member 2                  | 5 |
| OR3A3    | 8392   | Olfactory receptor, family 3, subfamily A, member 3                  | 4 |
| OR51B2   | 79345  | Olfactory receptor, family 51, subfamily B, member 2                 | 5 |
| OR51B4   | 79339  | Olfactory receptor, family 51, subfamily B, member 4                 | 5 |
| OR51E1   | 143503 | Olfactory receptor, family 51, subfamily E, member 1                 | 5 |
| OR51E2   | 81285  | Olfactory receptor, family 51, subfamily E, member 2                 | 5 |
| OR52A1   | 23538  | Olfactory receptor, family 52, subfamily A, member 1                 | 5 |
| OR5I1    | 10798  | Olfactory receptor, family 5, subfamily I, member 1                  | 5 |
| OR5P2    | 120065 | Olfactory receptor, family 5, subfamily P, member 2                  | 5 |
| OR5P3    | 120066 | Olfactory receptor, family 5, subfamily P, member 3                  | 4 |
| OR5V1    | 81696  | Olfactory receptor, family 5, subfamily V, member 1                  | 5 |
| OR6A2    | 8590   | Olfactory receptor, family 6, subfamily A, member 2                  | 4 |
| OR6W1P   | 89883  | Olfactory receptor, family 6, subfamily W, member 1 pseudogene       | 4 |
| OR7A17   | 26333  | Olfactory receptor, family 7, subfamily A, member 17                 | 4 |
| OR7A5    | 26659  | Olfactory receptor, family 7, subfamily A, member 5                  | 4 |
| OR7C2    | 26658  | Olfactory receptor, family 7, subfamily C, member 2                  | 4 |
| OR8B8    | 26493  | Olfactory receptor, family 8, subfamily B, member 8                  | 5 |
| OXER1    | 165140 | Oxoecosanoid (OXE) receptor 1                                        | 4 |
| OXTR     | 5021   | Oxytocin receptor                                                    | 4 |
| P2RY1    | 5028   | Purinergic receptor P2Y, G-protein coupled, 1                        | 5 |
| P2RY10   | 27334  | Purinergic receptor P2Y, G-protein coupled, 10                       | 4 |
| P2RY11   | 5032   | Purinergic receptor P2Y, G-protein coupled, 11                       | 5 |
| P2RY12   | 64805  | Purinergic receptor P2Y, G-protein coupled, 12                       | 5 |
| P2RY14   | 9934   | Purinergic receptor P2Y, G-protein coupled, 14                       | 3 |
| P2RY2    | 5029   | Purinergic receptor P2Y, G-protein coupled, 2                        | 3 |
| P2RY4    | 5030   | Pyrimidinergic receptor P2Y, G-protein coupled, 4                    | 4 |
| P2RY5    | 10161  | Purinergic receptor P2Y, G-protein coupled, 5                        | 5 |
| P2RY6    | 5031   | Pyrimidinergic receptor P2Y, G-protein coupled, 6                    | 5 |
| P2RY8    | 286530 | Purinergic receptor P2Y, G-protein coupled, 8                        | 5 |
| PBXIP1   | 57326  | Pre-B-cell leukemia homeobox interacting protein 1                   | 5 |
| PCYOX1L  | 78991  | Prenylcysteine oxidase 1 like                                        | 4 |
| PDE6A    | 5145   | Phosphodiesterase 6A, cGMP-specific, rod, alpha                      | 3 |
| PFKFB3   | 5209   | 6-phosphofructo-2-kinase/fructose-2,6-biphosphatase 3                | 5 |
| PHOX2B   | 8929   | Paired-like homeobox 2b                                              | 5 |
| PHTF1    | 10745  | Putative homeodomain transcription factor 1                          | 5 |
| PIAS2    | 9063   | Protein inhibitor of activated STAT, 2                               | 5 |
| PPARGC1B | 133522 | Peroxisome proliferator-activated receptor gamma, coactivator 1 beta | 5 |
| PPYR1    | 5540   | Pancreatic polypeptide receptor 1                                    | 5 |

|        |        |                                                                                             |   |
|--------|--------|---------------------------------------------------------------------------------------------|---|
| PRDM2  | 7799   | PR domain containing 2, with ZNF domain                                                     | 5 |
| PRDM5  | 11107  | PR domain containing 5                                                                      | 5 |
| PRDM7  | 11105  | PR domain containing 7                                                                      | 5 |
| PRLHR  | 2834   | Prolactin releasing hormone receptor                                                        | 4 |
| PROK2  | 60675  | Prokineticin 2                                                                              | 5 |
| PRRX2  | 51450  | Paired related homeobox 2                                                                   | 3 |
| PTAFR  | 5724   | platelet-activating factor rec                                                              | 5 |
| PTGDR  | 5729   | Prostaglandin D2 receptor (DP)                                                              | 5 |
| PTGER1 | 5731   | Prostaglandin E receptor 1 (subtype EP1), 42kDa                                             | 5 |
| PTGER2 | 5732   | Prostaglandin E receptor 2 (subtype EP2), 53kDa                                             | 5 |
| PTGER3 | 5733   | Prostaglandin E receptor 3 (subtype EP3)                                                    | 5 |
| PTGFR  | 5737   | Prostaglandin F receptor (FP)                                                               | 5 |
| PTGIR  | 5739   | Prostaglandin I2 (prostacyclin) receptor (IP)                                               | 5 |
| PTH2   | 5746   | parathyroid hormone receptor 2                                                              | 5 |
| PTTG1  | 9232   | Pituitary tumor-transforming 1                                                              | 4 |
| PURA   | 5813   | Purine-rich element binding protein A                                                       | 5 |
| QKI    | 9444   | Quaking homolog, KH domain RNA binding (mouse)                                              | 5 |
| RAI1   | 10743  | Retinoic acid induced 1                                                                     | 5 |
| RAMP1  | 10267  | Receptor (G protein-coupled) activity modifying protein 1                                   | 4 |
| RBM22  | 55696  | RNA binding motif protein 22                                                                | 4 |
| RDS    | 5961   | retinal degeneration, slow                                                                  | 5 |
| RELA   | 5970   | V-rel reticuloendotheliosis viral oncogene homolog A, nuclear factor of kappa light polypep | 5 |
| RELB   | 5971   | V-rel reticuloendotheliosis viral oncogene homolog B, nuclear factor of kappa light polypep | 4 |
| REST   | 5978   | RE1-silencing transcription factor                                                          | 5 |
| RFX1   | 5989   | Regulatory factor X, 1 (influences HLA class II expression)                                 | 5 |
| RFX2   | 5990   | Regulatory factor X, 2 (influences HLA class II expression)                                 | 5 |
| RFX3   | 5991   | Regulatory factor X, 3 (influences HLA class II expression)                                 | 4 |
| RFX4   | 5992   | Regulatory factor X, 4 (influences HLA class II expression)                                 | 5 |
| RFXANK | 8625   | Regulatory factor X-associated ankyrin-containing protein                                   | 5 |
| RFXAP  | 5994   | Regulatory factor X-associated protein                                                      | 3 |
| RGR    | 5995   | Retinal G protein coupled receptor                                                          | 5 |
| RLF    | 6018   | Rearranged L-myc fusion                                                                     | 5 |
| RNF103 | 7844   | Ring finger protein 103                                                                     | 5 |
| RNF133 | 168433 | Ring finger protein 133                                                                     | 5 |
| RPL7   | 6129   | Ribosomal protein L7                                                                        | 5 |
| RPS14  | 6208   | Ribosomal protein S14                                                                       | 5 |
| RRN3   | 54700  | RRN3 RNA polymerase I transcription factor homolog (S. cerevisiae)                          | 5 |
| RUNX1  | 861    | Runt-related transcription factor 1 (acute myeloid leukemia 1; aml1 oncogene)               | 5 |

|         |        |                                                                                          |   |
|---------|--------|------------------------------------------------------------------------------------------|---|
| RUNX1T1 | 862    | Runt-related transcription factor 1; translocated to, 1 (cyclin D-related)               | 3 |
| RUNX2   | 860    | Runt-related transcription factor 2                                                      | 5 |
| RUNX3   | 864    | Runt-related transcription factor 3                                                      | 4 |
| RWDD4A  | 201965 | RWD domain containing 4A                                                                 | 5 |
| RXFP1   | 59350  | Relaxin/insulin-like family peptide receptor 1                                           | 5 |
| RXFP2   | 122042 | Relaxin/insulin-like family peptide receptor 2                                           | 5 |
| RXFP3   | 51289  | Relaxin/insulin-like family peptide receptor 3                                           | 5 |
| RXFP4   | 339403 | Relaxin/insulin-like family peptide receptor 4                                           | 5 |
| SCTR    | 6344   | Secretin receptor                                                                        | 5 |
| SFRP4   | 6424   | Secreted frizzled-related protein 4                                                      | 5 |
| SFRP5   | 6425   | Secreted frizzled-related protein 5                                                      | 5 |
| SH3TC2  | 79628  | SH3 domain and tetratricopeptide repeats 2                                               | 5 |
| SIM1    | 6492   | Single-minded homolog 1 (Drosophila)                                                     | 5 |
| SIM2    | 6493   | Single-minded homolog 2 (Drosophila)                                                     | 5 |
| SIX1    | 6495   | SIX homeobox 1                                                                           | 5 |
| SIX2    | 10736  | SIX homeobox 2                                                                           | 4 |
| SIX3    | 6496   | SIX homeobox 3                                                                           | 5 |
| SKP2    | 6502   | S-phase kinase-associated protein 2 (p45)                                                | 5 |
| SLC26A2 | 1836   | Solute carrier family 26 (sulfate transporter), member 2                                 | 5 |
| SLC36A1 | 206358 | Solute carrier family 36 (proton/amino acid symporter), member 1                         | 5 |
| SLC6A7  | 6534   | Solute carrier family 6 (neurotransmitter transporter, L-proline), member 7              | 5 |
| SMARCA5 | 8467   | SWI/SNF related, matrix associated, actin dependent regulator of chromatin, subfamily a, | 5 |
| SMO     | 6608   | Smoothened homolog (Drosophila)                                                          | 5 |
| SORT1   | 6272   | Sortilin 1                                                                               | 5 |
| SOX14   | 8403   | SRY (sex determining region Y)-box 14                                                    | 4 |
| SPARC   | 6678   | Secreted protein, acidic, cysteine-rich (osteonectin)                                    | 5 |
| SPRY2   | 10253  | Sprouty homolog 2 (Drosophila)                                                           | 5 |
| SSTR1   | 6751   | Somatostatin receptor 1                                                                  | 5 |
| SSTR2   | 6752   | Somatostatin receptor 2                                                                  | 5 |
| SSTR3   | 6753   | Somatostatin receptor 3                                                                  | 4 |
| SSTR4   | 6754   | Somatostatin receptor 4                                                                  | 3 |
| SSTR5   | 6755   | Somatostatin receptor 5                                                                  | 3 |
| STUB1   | 10273  | STIP1 homology and U-box containing protein 1                                            | 5 |
| SUB1    | 10923  | SUB1 homolog (S. cerevisiae)                                                             | 4 |
| SUPT3H  | 8464   | Suppressor of Ty 3 homolog (S. cerevisiae)                                               | 5 |
| SURB7   | 9412   | SRB7 suppressor of RNA polymer                                                           | 5 |
| SYNPO   | 11346  | Synaptopodin                                                                             | 5 |
| TAAR1   | 134864 | Trace amine associated receptor 1                                                        | 5 |



|         |        |                                                                                      |   |
|---------|--------|--------------------------------------------------------------------------------------|---|
| TAAR2   | 9287   | Trace amine associated receptor 2                                                    | 5 |
| TAAR5   | 9038   | Trace amine associated receptor 5                                                    | 5 |
| TAAR6   | 319100 | Trace amine associated receptor 6                                                    | 4 |
| TAAR8   | 83551  | Trace amine associated receptor 8                                                    | 5 |
| TAAR9   | 134860 | Trace amine associated receptor 9                                                    | 5 |
| TACR1   | 6869   | Tachykinin receptor 1                                                                | 5 |
| TACR2   | 6865   | Tachykinin receptor 2                                                                | 5 |
| TACR3   | 6870   | Tachykinin receptor 3                                                                | 5 |
| TAF10   | 6881   | TAF10 RNA polymerase II, TATA box binding protein (TBP)-associated factor, 30kDa     | 5 |
| TAF11   | 6882   | TAF11 RNA polymerase II, TATA box binding protein (TBP)-associated factor, 28kDa     | 5 |
| TAF12   | 6883   | TAF12 RNA polymerase II, TATA box binding protein (TBP)-associated factor, 20kDa     | 5 |
| TAF1A   | 9015   | TATA box binding protein (TBP)-associated factor, RNA polymerase I, A, 48kDa         | 5 |
| TAF1B   | 9014   | TATA box binding protein (TBP)-associated factor, RNA polymerase I, B, 63kDa         | 5 |
| TAF1C   | 9013   | TATA box binding protein (TBP)-associated factor, RNA polymerase I, C, 110kDa        | 5 |
| TAF7    | 6879   | TAF7 RNA polymerase II, TATA box binding protein (TBP)-associated factor, 55kDa      | 5 |
| TAF7L   | 54457  | TAF7-like RNA polymerase II, TATA box binding protein (TBP)-associated factor, 50kDa | 5 |
| TAF9    | 6880   | TAF9 RNA polymerase II, TATA box binding protein (TBP)-associated factor, 32kDa      | 4 |
| TAL1    | 6886   | T-cell acute lymphocytic leuke                                                       | 5 |
| TAL2    | 6887   | T-cell acute lymphocytic leukemia 2                                                  | 4 |
| TAS1R1  | 80835  | Taste receptor, type 1, member 1                                                     | 5 |
| TAS1R2  | 80834  | Taste receptor, type 1, member 2                                                     | 5 |
| TAS2R1  | 50834  | Taste receptor, type 2, member 1                                                     | 5 |
| TAS2R10 | 50839  | Taste receptor, type 2, member 10                                                    | 5 |
| TAS2R13 | 50838  | Taste receptor, type 2, member 13                                                    | 5 |
| TAS2R14 | 50840  | Taste receptor, type 2, member 14                                                    | 5 |
| TAS2R16 | 50833  | Taste receptor, type 2, member 16                                                    | 5 |
| TAS2R3  | 50831  | Taste receptor, type 2, member 3                                                     | 5 |
| TAS2R39 | 259285 | Taste receptor, type 2, member 39                                                    | 4 |
| TAS2R4  | 50832  | Taste receptor, type 2, member 4                                                     | 5 |
| TAS2R40 | 259286 | Taste receptor, type 2, member 40                                                    | 5 |
| TAS2R41 | 259287 | Taste receptor, type 2, member 41                                                    | 5 |
| TAS2R45 | 259291 | Taste receptor, type 2, member 45                                                    | 5 |
| TAS2R46 | 259292 | Taste receptor, type 2, member 46                                                    | 5 |
| TAS2R48 | 259294 | Taste receptor, type 2, member 48                                                    | 5 |
| TAS2R5  | 54429  | Taste receptor, type 2, member 5                                                     | 5 |
| TAS2R60 | 338398 | Taste receptor, type 2, member 60                                                    | 5 |
| TAS2R7  | 50837  | Taste receptor, type 2, member 7                                                     | 5 |
| TAS2R8  | 50836  | Taste receptor, type 2, member 8                                                     | 5 |

|         |        |                                                                             |   |
|---------|--------|-----------------------------------------------------------------------------|---|
| TAS2R9  | 50835  | Taste receptor, type 2, member 9                                            | 5 |
| TBP     | 6908   | TATA box binding protein                                                    | 4 |
| TBR1    | 10716  | T-box, brain, 1                                                             | 4 |
| TBX1    | 6899   | T-box 1                                                                     | 4 |
| TBX19   | 9095   | T-box 19                                                                    | 5 |
| TBX2    | 6909   | T-box 2                                                                     | 5 |
| TBX6    | 6911   | T-box 6                                                                     | 4 |
| TBXA2R  | 6915   | Thromboxane A2 receptor                                                     | 4 |
| TCEAL1  | 9338   | Transcription elongation factor A (SII)-like 1                              | 5 |
| TCEB3   | 6924   | Transcription elongation factor B (SIII), polypeptide 3 (110kDa, elongin A) | 5 |
| TCERG1  | 10915  | Transcription elongation regulator 1                                        | 5 |
| TCF12   | 6938   | Transcription factor 12 (HTF4, helix-loop-helix transcription factors 4)    | 5 |
| TCF15   | 6939   | Transcription factor 15 (basic helix-loop-helix)                            | 2 |
| TCF4    | 6925   | Transcription factor 4                                                      | 5 |
| TCFL5   | 10732  | Transcription factor-like 5 (basic helix-loop-helix)                        | 5 |
| TCOF1   | 6949   | Treacher Collins-Franceschetti syndrome 1                                   | 5 |
| TEAD2   | 8463   | TEA domain family member 2                                                  | 5 |
| TFEB    | 7942   | Transcription factor EB                                                     | 5 |
| TGIF2LX | 90316  | TGFB-induced factor homeobox 2-like, X-linked                               | 5 |
| TIGD6   | 81789  | Tigger transposable element derived 6                                       | 5 |
| TLX1    | 3195   | T-cell leukemia homeobox 1                                                  | 5 |
| TMEM171 | 134285 | Transmembrane protein 171                                                   | 4 |
| TMEM86B | 255043 | Transmembrane protein 86B                                                   | 5 |
| TNIP1   | 10318  | TNFAIP3 interacting protein 1                                               | 5 |
| TOB1    | 10140  | Transducer of ERBB2, 1                                                      | 5 |
| TOPORS  | 10210  | Topoisomerase I binding, arginine/serine-rich                               | 5 |
| TRAF5   | 7188   | TNF receptor-associated factor 5                                            | 5 |
| TRAF6   | 7189   | TNF receptor-associated factor 6                                            | 5 |
| TRHR    | 7201   | Thyrotropin-releasing hormone receptor                                      | 5 |
| TRIM38  | 10475  | Tripartite motif-containing 38                                              | 5 |
| TRIM40  | 135644 | Tripartite motif-containing 40                                              | 4 |
| TSC22D1 | 8848   | TSC22 domain family, member 1                                               | 5 |
| TSC22D3 | 1831   | TSC22 domain family, member 3                                               | 5 |
| TSG101  | 7251   | Tumor susceptibility gene 101                                               | 5 |
| TSHR    | 7253   | Thyroid stimulating hormone receptor                                        | 5 |
| TUBB3   | 10381  | Tubulin, beta 3                                                             | 5 |
| TWISTNB | 221830 | TWIST neighbor                                                              | 5 |
| UBC     | 7316   | Ubiquitin C                                                                 | 5 |

|         |        |                                                                        |   |
|---------|--------|------------------------------------------------------------------------|---|
| UBE2E2  | 7325   | Ubiquitin-conjugating enzyme E2E 2 (UBC4/5 homolog, yeast)             | 3 |
| UBE2E3  | 10477  | Ubiquitin-conjugating enzyme E2E 3 (UBC4/5 homolog, yeast)             | 5 |
| UBE2U   | 148581 | Ubiquitin-conjugating enzyme E2U (putative)                            | 5 |
| UBE4A   | 9354   | Ubiquitination factor E4A (UFD2 homolog, yeast)                        | 5 |
| UBE4B   | 10277  | Ubiquitination factor E4B (UFD2 homolog, yeast)                        | 5 |
| UBL5    | 59286  | Ubiquitin-like 5                                                       | 5 |
| UBL7    | 84993  | Ubiquitin-like 7 (bone marrow stromal cell-derived)                    | 4 |
| UBXD3   | 127733 | UBX domain containing 3                                                | 4 |
| UBXD6   | 7993   | UBX domain containing 6                                                | 5 |
| UCHL3   | 7347   | Ubiquitin carboxyl-terminal esterase L3 (ubiquitin thiolesterase)      | 5 |
| USP11   | 8237   | Ubiquitin specific peptidase 11                                        | 3 |
| USP15   | 9958   | Ubiquitin specific peptidase 15                                        | 5 |
| USP26   | 83844  | Ubiquitin specific peptidase 26                                        | 5 |
| USP32   | 84669  | Ubiquitin specific peptidase 32                                        | 5 |
| USP6    | 9098   | Ubiquitin specific peptidase 6 (Tre-2 oncogene)                        | 3 |
| USP9X   | 8239   | Ubiquitin specific peptidase 9, X-linked                               | 4 |
| USP9Y   | 8287   | Ubiquitin specific peptidase 9, Y-linked (fat facets-like, Drosophila) | 5 |
| USPL1   | 10208  | Ubiquitin specific peptidase like 1                                    | 5 |
| UTF1    | 8433   | Undifferentiated embryonic cell transcription factor 1                 | 2 |
| UTS2R   | 2837   | Urotensin 2 receptor                                                   | 5 |
| VEZF1   | 7716   | Vascular endothelial zinc finger 1                                     | 5 |
| VIPR1   | 7433   | Vasoactive intestinal peptide receptor 1                               | 5 |
| VIPR2   | 7434   | Vasoactive intestinal peptide receptor 2                               | 5 |
| VN1R1   | 57191  | Vomeronasal 1 receptor 1                                               | 5 |
| YEATS4  | 8089   | YEATS domain containing 4                                              | 5 |
| ZBTB16  | 7704   | Zinc finger and BTB domain containing 16                               | 5 |
| ZBTB17  | 7709   | Zinc finger and BTB domain containing 17                               | 4 |
| ZBTB22  | 9278   | Zinc finger and BTB domain containing 22                               | 5 |
| ZBTB48  | 3104   | Zinc finger and BTB domain containing 48                               | 5 |
| ZFAND5  | 7763   | Zinc finger, AN1-type domain 5                                         | 5 |
| ZFHX4   | 79776  | Zinc finger homeobox 4                                                 | 5 |
| ZFP36L2 | 678    | Zinc finger protein 36, C3H type-like 2                                | 5 |
| ZNF10   | 7556   | Zinc finger protein 10                                                 | 5 |
| ZNF135  | 7694   | Zinc finger protein 135                                                | 4 |
| ZNF136  | 7695   | Zinc finger protein 136                                                | 4 |
| ZNF137  | 7696   | Zinc finger protein 137                                                | 5 |
| ZNF138  | 7697   | Zinc finger protein 138                                                | 5 |
| ZNF14   | 7561   | Zinc finger protein 14                                                 | 5 |

|        |      |                                |   |
|--------|------|--------------------------------|---|
| ZNF140 | 7699 | Zinc finger protein 140        | 5 |
| ZNF141 | 7700 | Zinc finger protein 141        | 5 |
| ZNF143 | 7702 | Zinc finger protein 143        | 5 |
| ZNF146 | 7705 | Zinc finger protein 146        | 3 |
| ZNF148 | 7707 | Zinc finger protein 148        | 5 |
| ZNF154 | 7710 | Zinc finger protein 154        | 5 |
| ZNF155 | 7711 | Zinc finger protein 155        | 5 |
| ZNF157 | 7712 | Zinc finger protein 157        | 5 |
| ZNF16  | 7564 | Zinc finger protein 16         | 5 |
| ZNF165 | 7718 | Zinc finger protein 165        | 5 |
| ZNF17  | 7565 | Zinc finger protein 17         | 5 |
| ZNF174 | 7727 | Zinc finger protein 174        | 5 |
| ZNF175 | 7728 | Zinc finger protein 175        | 4 |
| ZNF177 | 7730 | Zinc finger protein 177        | 5 |
| ZNF180 | 7733 | Zinc finger protein 180        | 5 |
| ZNF187 | 7741 | Zinc finger protein 187        | 5 |
| ZNF189 | 7743 | Zinc finger protein 189        | 5 |
| ZNF19  | 7567 | zinc finger protein 19 (KOX 12 | 5 |
| ZNF192 | 7745 | Zinc finger protein 192        | 5 |
| ZNF193 | 7746 | Zinc finger protein 193        | 5 |
| ZNF195 | 7748 | Zinc finger protein 195        | 5 |
| ZNF20  | 7568 | Zinc finger protein 20         | 5 |
| ZNF202 | 7753 | Zinc finger protein 202        | 5 |
| ZNF207 | 7756 | Zinc finger protein 207        | 5 |
| ZNF208 | 7757 | Zinc finger protein 208        | 5 |
| ZNF212 | 7988 | Zinc finger protein 212        | 4 |
| ZNF213 | 7760 | Zinc finger protein 213        | 4 |
| ZNF214 | 7761 | Zinc finger protein 214        | 5 |
| ZNF215 | 7762 | Zinc finger protein 215        | 4 |
| ZNF217 | 7764 | Zinc finger protein 217        | 5 |
| ZNF221 | 7638 | Zinc finger protein 221        | 5 |
| ZNF223 | 7766 | Zinc finger protein 223        | 5 |
| ZNF224 | 7767 | Zinc finger protein 224        | 5 |
| ZNF225 | 7768 | Zinc finger protein 225        | 5 |
| ZNF226 | 7769 | Zinc finger protein 226        | 5 |
| ZNF227 | 7770 | Zinc finger protein 227        | 5 |
| ZNF228 | 7771 | Zinc finger protein 228        | 5 |
| ZNF230 | 7773 | Zinc finger protein 230        | 5 |

|         |        |                                              |   |
|---------|--------|----------------------------------------------|---|
| ZNF234  | 10780  | Zinc finger protein 234                      | 5 |
| ZNF235  | 9310   | Zinc finger protein 235                      | 5 |
| ZNF239  | 8187   | Zinc finger protein 239                      | 5 |
| ZNF24   | 7572   | Zinc finger protein 24                       | 5 |
| ZNF26   | 7574   | Zinc finger protein 26                       | 4 |
| ZNF266  | 10781  | Zinc finger protein 266                      | 5 |
| ZNF268  | 10795  | Zinc finger protein 268                      | 5 |
| ZNF274  | 10782  | Zinc finger protein 274                      | 5 |
| ZNF286  | 57335  | zinc finger protein 286                      | 5 |
| ZNF287  | 57336  | Zinc finger protein 287                      | 5 |
| ZNF30   | 90075  | Zinc finger protein 30                       | 5 |
| ZNF300  | 91975  | Zinc finger protein 300                      | 5 |
| ZNF31   | 7579   | zinc finger protein 31 (KOX 29               | 5 |
| ZNF32   | 7580   | Zinc finger protein 32                       | 5 |
| ZNF33A  | 7581   | Zinc finger protein 33A                      | 3 |
| ZNF33B  | 7582   | Zinc finger protein 33B                      | 5 |
| ZNF35   | 7584   | Zinc finger protein 35                       | 5 |
| ZNF354A | 6940   | Zinc finger protein 354A                     | 5 |
| ZNF38   | 7589   | zinc finger protein 38                       | 5 |
| ZNF396  | 252884 | Zinc finger protein 396                      | 5 |
| ZNF408  | 79797  | Zinc finger protein 408                      | 5 |
| ZNF41   | 7592   | Zinc finger protein 41                       | 5 |
| ZNF417  | 147687 | Zinc finger protein 417                      | 5 |
| ZNF460  | 10794  | Zinc finger protein 460                      | 3 |
| ZNF549  | 256051 | Zinc finger protein 549                      | 5 |
| ZNF551  | 90233  | Zinc finger protein 551                      | 5 |
| ZNF668  | 79759  | Zinc finger protein 668                      | 5 |
| ZNF690  | 146050 | hypothetical protein FLJ35867                | 5 |
| ZNF7    | 7553   | Zinc finger protein 7                        | 5 |
| ZNF785  | 146540 | Zinc finger protein 785                      | 5 |
| ZNF80   | 7634   | Zinc finger protein 80                       | 3 |
| ZNF84   | 7637   | Zinc finger protein 84                       | 5 |
| ZNRF2   | 223082 | Zinc and ring finger 2                       | 5 |
| ZRANB2  | 9406   | Zinc finger, RAN-binding domain containing 2 | 5 |

**POOL 5**

| Symbol | NCBI Gene ID | Description                                                      | Number of shRNAs |
|--------|--------------|------------------------------------------------------------------|------------------|
| A4GALT | 53947        | Alpha 1,4-galactosyltransferase (globotriaosylceramide synthase) | 5                |

|           |        |                                                                                                                                        |   |
|-----------|--------|----------------------------------------------------------------------------------------------------------------------------------------|---|
| A4GNT     | 51146  | Alpha-1,4-N-acetylglucosaminyltransferase                                                                                              | 5 |
| AADAT     | 51166  | Amino adipate aminotransferase                                                                                                         | 5 |
| ABAT      | 18     | 4-aminobutyrate aminotransferase                                                                                                       | 5 |
| ABO       | 28     | ABO blood group (transferase A, alpha 1-3-N-acetylgalactosaminyltransferase; transferase B, alpha 1-3-N-acetylglucosaminyltransferase) | 5 |
| ADAM2     | 2515   | ADAM metalloproteinase domain 2 (fertilin beta)                                                                                        | 5 |
| ADCYAP1R1 | 117    | Adenylate cyclase activating polypeptide 1 (pituitary) receptor type I                                                                 | 4 |
| ADMR      | 11318  | adrenomedullin receptor                                                                                                                | 4 |
| ADORA1    | 134    | Adenosine A1 receptor                                                                                                                  | 5 |
| ADORA2A   | 135    | Adenosine A2a receptor                                                                                                                 | 5 |
| ADORA3    | 140    | Adenosine A3 receptor                                                                                                                  | 5 |
| ADRA1A    | 148    | Adrenergic, alpha-1A-, receptor                                                                                                        | 5 |
| ADRA1B    | 147    | Adrenergic, alpha-1B-, receptor                                                                                                        | 5 |
| ADRA1D    | 146    | Adrenergic, alpha-1D-, receptor                                                                                                        | 4 |
| ADRA2A    | 150    | Adrenergic, alpha-2A-, receptor                                                                                                        | 4 |
| ADRA2B    | 151    | Adrenergic, alpha-2B-, receptor                                                                                                        | 5 |
| AGL       | 178    | Amylo-1, 6-glucosidase, 4-alpha-glucanotransferase (glycogen debranching enzyme, glycogen phosphorylase-activating factor)             | 5 |
| AGPAT1    | 10554  | 1-acylglycerol-3-phosphate O-acyltransferase 1 (lysophosphatidic acid acyltransferase, alpha)                                          | 5 |
| AGPAT2    | 10555  | 1-acylglycerol-3-phosphate O-acyltransferase 2 (lysophosphatidic acid acyltransferase, beta)                                           | 5 |
| AGPAT3    | 56894  | 1-acylglycerol-3-phosphate O-acyltransferase 3                                                                                         | 4 |
| AGPAT4    | 56895  | 1-acylglycerol-3-phosphate O-acyltransferase 4 (lysophosphatidic acid acyltransferase, delta)                                          | 4 |
| AGPAT6    | 137964 | 1-acylglycerol-3-phosphate O-acyltransferase 6 (lysophosphatidic acid acyltransferase, zeta)                                           | 3 |
| AGXT      | 189    | Alanine-glyoxylate aminotransferase                                                                                                    | 5 |
| AGXT2     | 64902  | Alanine-glyoxylate aminotransferase 2                                                                                                  | 5 |
| AGXT2L1   | 64850  | Alanine-glyoxylate aminotransferase 2-like 1                                                                                           | 5 |
| ALDH1A2   | 8854   | Aldehyde dehydrogenase 1 family, member A2                                                                                             | 5 |
| ALDH4A1   | 8659   | Aldehyde dehydrogenase 4 family, member A1                                                                                             | 5 |
| ALDH5A1   | 7915   | Aldehyde dehydrogenase 5 family, member A1 (succinate-semialdehyde dehydrogenase)                                                      | 5 |
| ALG10     | 84920  | Asparagine-linked glycosylation 10 homolog (yeast, alpha-1,2-glucosyltransferase)                                                      | 5 |
| ALG9      | 79796  | Asparagine-linked glycosylation 9 homolog (S. cerevisiae, alpha- 1,2-mannosyltransferase)                                              | 5 |
| ALS2CR2   | 55437  | Amyotrophic lateral sclerosis 2 (juvenile) chromosome region, candidate 2                                                              | 5 |
| AMPH      | 273    | Amphiphysin                                                                                                                            | 4 |
| AMT       | 275    | Aminomethyltransferase                                                                                                                 | 3 |
| ANP32A    | 8125   | Acidic (leucine-rich) nuclear phosphoprotein 32 family, member A                                                                       | 5 |
| APPL      | 26060  | adaptor protein containing pH                                                                                                          | 4 |
| APRT      | 353    | Adenine phosphoribosyltransferase                                                                                                      | 5 |
| ARHGDI1A  | 396    | Rho GDP dissociation inhibitor (GDI) alpha                                                                                             | 4 |
| ARIH2     | 10425  | Ariadne homolog 2 (Drosophila)                                                                                                         | 5 |
| ART5      | 116969 | ADP-ribosyltransferase 5                                                                                                               | 5 |

|           |        |                                                                                    |   |
|-----------|--------|------------------------------------------------------------------------------------|---|
| AS3MT     | 57412  | Arsenic (+3 oxidation state) methyltransferase                                     | 5 |
| ATIC      | 471    | 5-aminoimidazole-4-carboxamide ribonucleotide formyltransferase/IMP cyclohydrolase | 5 |
| ATP2B4    | 493    | ATPase, Ca <sup>++</sup> transporting, plasma membrane 4                           | 5 |
| B3GALT5   | 10317  | UDP-Gal:betaGlcNAc beta 1,3-galactosyltransferase, polypeptide 5                   | 5 |
| B3GALTL   | 145173 | Beta 1,3-galactosyltransferase-like                                                | 5 |
| B3GNT5    | 84002  | UDP-GlcNAc:betaGal beta-1,3-N-acetylglucosaminyltransferase 5                      | 5 |
| B4GALNT4  | 338707 | Beta-1,4-N-acetyl-galactosaminyl transferase 4                                     | 5 |
| B4GALT1   | 2683   | UDP-Gal:betaGlcNAc beta 1,4- galactosyltransferase, polypeptide 1                  | 4 |
| B4GALT2   | 8704   | UDP-Gal:betaGlcNAc beta 1,4- galactosyltransferase, polypeptide 2                  | 5 |
| B4GALT3   | 8703   | UDP-Gal:betaGlcNAc beta 1,4- galactosyltransferase, polypeptide 3                  | 4 |
| B4GALT6   | 9331   | UDP-Gal:betaGlcNAc beta 1,4- galactosyltransferase, polypeptide 6                  | 5 |
| BAD       | 572    | BCL2-antagonist of cell death                                                      | 5 |
| BAK1      | 578    | BCL2-antagonist/killer 1                                                           | 5 |
| BAX       | 581    | BCL2-associated X protein                                                          | 5 |
| BAZ1A     | 11177  | Bromodomain adjacent to zinc finger domain, 1A                                     | 5 |
| BCAT1     | 586    | Branched chain aminotransferase 1, cytosolic                                       | 4 |
| BCAT2     | 587    | Branched chain aminotransferase 2, mitochondrial                                   | 5 |
| BCL11A    | 53335  | B-cell CLL/lymphoma 11A (zinc finger protein)                                      | 5 |
| BCL11B    | 64919  | B-cell CLL/lymphoma 11B (zinc finger protein)                                      | 5 |
| BCL2A1    | 597    | BCL2-related protein A1                                                            | 5 |
| BCL2L1    | 598    | BCL2-like 1                                                                        | 5 |
| BCL2L12   | 83596  | BCL2-like 12 (proline rich)                                                        | 5 |
| BCL2L14   | 79370  | BCL2-like 14 (apoptosis facilitator)                                               | 5 |
| BCL2L2    | 599    | BCL2-like 2                                                                        | 5 |
| BCL7A     | 605    | B-cell CLL/lymphoma 7A                                                             | 5 |
| BCL9L     | 283149 | B-cell CLL/lymphoma 9-like                                                         | 5 |
| BCOR      | 54880  | BCL6 co-repressor                                                                  | 5 |
| BCORL1    | 63035  | BCL6 co-repressor-like 1                                                           | 5 |
| BCORL2    | 286554 | BCL6 co-repressor-like 2                                                           | 5 |
| BFAR      | 51283  | Bifunctional apoptosis regulator                                                   | 5 |
| BIRC7     | 79444  | Baculoviral IAP repeat-containing 7 (livin)                                        | 5 |
| BRAF      | 673    | V-raf murine sarcoma viral oncogene homolog B1                                     | 5 |
| BRD2      | 6046   | Bromodomain containing 2                                                           | 5 |
| BRDT      | 676    | Bromodomain, testis-specific                                                       | 5 |
| C14orf4   | 64207  | Chromosome 14 open reading frame 4                                                 | 4 |
| C16orf28  | 65259  | chromosome 16 open reading fra                                                     | 5 |
| C1GALT1C1 | 29071  | C1GALT1-specific chaperone 1                                                       | 5 |
| C1orf166  | 79594  | Chromosome 1 open reading frame 166                                                | 5 |

|          |        |                                                                     |   |
|----------|--------|---------------------------------------------------------------------|---|
| C2orf49  | 79074  | Chromosome 2 open reading frame 49                                  | 5 |
| CARM1L   | 256280 | coactivator associated arginin                                      | 5 |
| CASC1    | 55259  | Cancer susceptibility candidate 1                                   | 4 |
| CAV1     | 857    | Caveolin 1, caveolae protein, 22kDa                                 | 4 |
| CBLL1    | 79872  | Cas-Br-M (murine) ecotropic retroviral transforming sequence-like 1 | 5 |
| CCKBR    | 887    | Cholecystokinin B receptor                                          | 4 |
| CCL2     | 6347   | Chemokine (C-C motif) ligand 2                                      | 5 |
| CCNB3    | 85417  | Cyclin B3                                                           | 5 |
| CDC14B   | 8555   | CDC14 cell division cycle 14 homolog B (S. cerevisiae)              | 3 |
| CDC2L1   | 984    | cell division cycle 2-like 1 (                                      | 5 |
| CDC2L2   | 985    | Cell division cycle 2-like 2 (PITSLRE proteins)                     | 5 |
| CDK5R1   | 8851   | Cyclin-dependent kinase 5, regulatory subunit 1 (p35)               | 5 |
| CDKL1    | 8814   | Cyclin-dependent kinase-like 1 (CDC2-related kinase)                | 5 |
| CGRRF1   | 10668  | Cell growth regulator with ring finger domain 1                     | 4 |
| CHAT     | 1103   | Choline acetyltransferase                                           | 5 |
| CHST10   | 9486   | Carbohydrate sulfotransferase 10                                    | 5 |
| CHST2    | 9435   | Carbohydrate (N-acetylglucosamine-6-O) sulfotransferase 2           | 5 |
| CHST4    | 10164  | Carbohydrate (N-acetylglucosamine 6-O) sulfotransferase 4           | 5 |
| CHST5    | 23563  | carbohydrate (N-acetylglucosam                                      | 5 |
| CHST7    | 56548  | Carbohydrate (N-acetylglucosamine 6-O) sulfotransferase 7           | 5 |
| CHST8    | 64377  | Carbohydrate (N-acetylgalactosamine 4-O) sulfotransferase 8         | 5 |
| CHST9    | 83539  | Carbohydrate (N-acetylgalactosamine 4-O) sulfotransferase 9         | 5 |
| CKMT2    | 1160   | Creatine kinase, mitochondrial 2 (sarcomeric)                       | 4 |
| CMPK     | 51727  | Cytidylate kinase                                                   | 5 |
| CNTN2    | 6900   | Contactin 2 (axonal)                                                | 4 |
| COL4A3BP | 10087  | Collagen, type IV, alpha 3 (Goodpasture antigen) binding protein    | 5 |
| CPNE1    | 8904   | Copine I                                                            | 4 |
| CSNK1A1L | 122011 | Casein kinase 1, alpha 1-like                                       | 5 |
| CSPG2    | 1462   | chondroitin sulfate proteoglyc                                      | 5 |
| CYB561D2 | 11068  | Cytochrome b-561 domain containing 2                                | 4 |
| DGKA     | 1606   | Diacylglycerol kinase, alpha 80kDa                                  | 5 |
| DGKE     | 8526   | Diacylglycerol kinase, epsilon 64kDa                                | 5 |
| DGKI     | 9162   | Diacylglycerol kinase, iota                                         | 4 |
| DGKQ     | 1609   | Diacylglycerol kinase, theta 110kDa                                 | 4 |
| DGUOK    | 1716   | Deoxyguanosine kinase                                               | 4 |
| DHH      | 50846  | Desert hedgehog homolog (Drosophila)                                | 5 |
| DHRS9    | 10170  | Dehydrogenase/reductase (SDR family) member 9                       | 5 |
| DIMT1L   | 27292  | DIM1 dimethyladenosine transferase 1-like (S. cerevisiae)           | 5 |



|         |        |                                                                         |   |
|---------|--------|-------------------------------------------------------------------------|---|
| DKK1    | 22943  | Dickkopf homolog 1 ( <i>Xenopus laevis</i> )                            | 5 |
| DKK2    | 27123  | Dickkopf homolog 2 ( <i>Xenopus laevis</i> )                            | 5 |
| DKK3    | 27122  | Dickkopf homolog 3 ( <i>Xenopus laevis</i> )                            | 5 |
| DLG1    | 1739   | Discs, large homolog 1 ( <i>Drosophila</i> )                            | 5 |
| DLG2    | 1740   | Discs, large homolog 2, chapsyn-110 ( <i>Drosophila</i> )               | 5 |
| DLG4    | 1742   | Discs, large homolog 4 ( <i>Drosophila</i> )                            | 5 |
| DLL1    | 28514  | Delta-like 1 ( <i>Drosophila</i> )                                      | 4 |
| DLL3    | 10683  | Delta-like 3 ( <i>Drosophila</i> )                                      | 5 |
| DLL4    | 54567  | Delta-like 4 ( <i>Drosophila</i> )                                      | 5 |
| DPM3    | 54344  | Dolichyl-phosphate mannosyltransferase polypeptide 3                    | 3 |
| DTYMK   | 1841   | Deoxythymidylate kinase (thymidylate kinase)                            | 4 |
| DULLARD | 23399  | Dullard homolog ( <i>Xenopus laevis</i> )                               | 5 |
| DUSP21  | 63904  | Dual specificity phosphatase 21                                         | 5 |
| DUSP22  | 56940  | Dual specificity phosphatase 22                                         | 5 |
| DUSP3   | 1845   | Dual specificity phosphatase 3 (vaccinia virus phosphatase VH1-related) | 5 |
| DUSP4   | 1846   | Dual specificity phosphatase 4                                          | 4 |
| DVL1    | 1855   | Dishevelled, dsh homolog 1 ( <i>Drosophila</i> )                        | 5 |
| DVL2    | 1856   | Dishevelled, dsh homolog 2 ( <i>Drosophila</i> )                        | 5 |
| DVL3    | 1857   | Dishevelled, dsh homolog 3 ( <i>Drosophila</i> )                        | 5 |
| DZIP3   | 9666   | DAZ interacting protein 3, zinc finger                                  | 5 |
| EEF2K   | 29904  | Eukaryotic elongation factor-2 kinase                                   | 5 |
| EHBP1   | 23301  | EH domain binding protein 1                                             | 5 |
| ENPP6   | 133121 | Ectonucleotide pyrophosphatase/phosphodiesterase 6                      | 4 |
| EPHA1   | 2041   | EPH receptor A1                                                         | 5 |
| EPHA2   | 1969   | EPH receptor A2                                                         | 5 |
| EPHA3   | 2042   | EPH receptor A3                                                         | 5 |
| EPHA5   | 2044   | EPH receptor A5                                                         | 5 |
| EPHA7   | 2045   | EPH receptor A7                                                         | 4 |
| EPHB2   | 2048   | EPH receptor B2                                                         | 5 |
| EPHB3   | 2049   | EPH receptor B3                                                         | 4 |
| ESRRG   | 2104   | Estrogen-related receptor gamma                                         | 5 |
| FBXL12  | 54850  | F-box and leucine-rich repeat protein 12                                | 5 |
| FBXO21  | 23014  | F-box protein 21                                                        | 5 |
| FBXO4   | 26272  | F-box protein 4                                                         | 5 |
| FBXO8   | 26269  | F-box protein 8                                                         | 5 |
| FBXO9   | 26268  | F-box protein 9                                                         | 5 |
| FGF18   | 8817   | Fibroblast growth factor 18                                             | 5 |
| FHL2    | 2274   | Four and a half LIM domains 2                                           | 5 |

|          |        |                                                                                          |   |
|----------|--------|------------------------------------------------------------------------------------------|---|
| FKBP1A   | 2280   | FK506 binding protein 1A, 12kDa                                                          | 5 |
| FLCN     | 201163 | Folliculin                                                                               | 4 |
| FLJ30294 | 130827 | hypothetical protein FLJ30294                                                            | 5 |
| FTCD     | 10841  | Formiminotransferase cyclodeaminase                                                      | 5 |
| FXN      | 2395   | Frataxin                                                                                 | 4 |
| GAL3ST2  | 64090  | Galactose-3-O-sulfotransferase 2                                                         | 5 |
| GALNT12  | 79695  | UDP-N-acetyl-alpha-D-galactosamine:polypeptide N-acetylglucosaminyltransferase 12 (      | 5 |
| GALNT14  | 79623  | UDP-N-acetyl-alpha-D-galactosamine:polypeptide N-acetylglucosaminyltransferase 14 (      | 5 |
| GALNTL1  | 57452  | UDP-N-acetyl-alpha-D-galactosamine:polypeptide N-acetylglucosaminyltransferase-like      | 5 |
| GART     | 2618   | Phosphoribosylglycinamide formyltransferase, phosphoribosylglycinamide synthetase, pho   | 4 |
| GATM     | 2628   | Glycine amidinotransferase (L-arginine:glycine amidinotransferase)                       | 5 |
| GCNT1    | 2650   | Glucosaminyl (N-acetyl) transferase 1, core 2 (beta-1,6-N-acetylglucosaminyltransferase) | 5 |
| GLI2     | 2736   | GLI-Kruppel family member GLI2                                                           | 5 |
| GLT25D1  | 79709  | Glycosyltransferase 25 domain containing 1                                               | 5 |
| GLT25D2  | 23127  | Glycosyltransferase 25 domain containing 2                                               | 4 |
| GLT28D1  | 55849  | glycosyltransferase 28 domain                                                            | 5 |
| GLT8D1   | 55830  | Glycosyltransferase 8 domain containing 1                                                | 5 |
| GLT8D2   | 83468  | Glycosyltransferase 8 domain containing 2                                                | 5 |
| GMIP     | 51291  | GEM interacting protein                                                                  | 5 |
| GNB2L1   | 10399  | Guanine nucleotide binding protein (G protein), beta polypeptide 2-like 1                | 4 |
| GNE      | 10020  | Glucosamine (UDP-N-acetyl)-2-epimerase/N-acetylmannosamine kinase                        | 5 |
| GNLY     | 10578  | Granulysin                                                                               | 5 |
| GOT1     | 2805   | Glutamic-oxaloacetic transaminase 1, soluble (aspartate aminotransferase 1)              | 3 |
| GOT2     | 2806   | Glutamic-oxaloacetic transaminase 2, mitochondrial (aspartate aminotransferase 2)        | 5 |
| GPR45    | 11250  | G protein-coupled receptor 45                                                            | 5 |
| GPSM2    | 29899  | G-protein signaling modulator 2 (AGS3-like, C. elegans)                                  | 4 |
| GPT      | 2875   | Glutamic-pyruvate transaminase (alanine aminotransferase)                                | 5 |
| GPT2     | 84706  | Glutamic pyruvate transaminase (alanine aminotransferase) 2                              | 5 |
| GTF2H1   | 2965   | General transcription factor IIH, polypeptide 1, 62kDa                                   | 5 |
| GUK1     | 2987   | Guanylate kinase 1                                                                       | 5 |
| GYLTL1B  | 120071 | Glycosyltransferase-like 1B                                                              | 5 |
| GZMA     | 3001   | Granzyme A (granzyme 1, cytotoxic T-lymphocyte-associated serine esterase 3)             | 5 |
| GZMB     | 3002   | Granzyme B (granzyme 2, cytotoxic T-lymphocyte-associated serine esterase 1)             | 5 |
| GZMH     | 2999   | Granzyme H (cathepsin G-like 2, protein h-CCPX)                                          | 5 |
| GZMK     | 3003   | Granzyme K (granzyme 3; tryptase II)                                                     | 5 |
| GZMM     | 3004   | Granzyme M (lymphocyte met-ase 1)                                                        | 4 |
| H6PD     | 9563   | Hexose-6-phosphate dehydrogenase (glucose 1-dehydrogenase)                               | 5 |
| HABP2    | 3026   | Hyaluronan binding protein 2                                                             | 5 |

|           |        |                                                                 |   |
|-----------|--------|-----------------------------------------------------------------|---|
| HAT1      | 8520   | Histone acetyltransferase 1                                     | 5 |
| HERC4     | 26091  | Hect domain and RLD 4                                           | 5 |
| HIP1      | 3092   | Huntingtin interacting protein 1                                | 4 |
| HIPK4     | 147746 | Homeodomain interacting protein kinase 4                        | 5 |
| HPRT1     | 3251   | Hypoxanthine phosphoribosyltransferase 1 (Lesch-Nyhan syndrome) | 5 |
| HRAS      | 3265   | V-Ha-ras Harvey rat sarcoma viral oncogene homolog              | 5 |
| HS2ST1    | 9653   | Heparan sulfate 2-O-sulfotransferase 1                          | 5 |
| HSD11B1L  | 374875 | Hydroxysteroid (11-beta) dehydrogenase 1-like                   | 4 |
| HSD17B2   | 3294   | Hydroxysteroid (17-beta) dehydrogenase 2                        | 5 |
| HSD17B3   | 3293   | Hydroxysteroid (17-beta) dehydrogenase 3                        | 4 |
| HSD17B4   | 3295   | Hydroxysteroid (17-beta) dehydrogenase 4                        | 5 |
| HSPA4     | 3308   | Heat shock 70kDa protein 4                                      | 5 |
| ICMT      | 23463  | Isoprenylcysteine carboxyl methyltransferase                    | 5 |
| IDH1      | 3417   | Isocitrate dehydrogenase 1 (NADP+), soluble                     | 5 |
| IDH2      | 3418   | Isocitrate dehydrogenase 2 (NADP+), mitochondrial               | 5 |
| IDH3A     | 3419   | Isocitrate dehydrogenase 3 (NAD+) alpha                         | 5 |
| IDH3B     | 3420   | Isocitrate dehydrogenase 3 (NAD+) beta                          | 5 |
| IDH3G     | 3421   | Isocitrate dehydrogenase 3 (NAD+) gamma                         | 5 |
| IFNA21    | 3452   | Interferon, alpha 21                                            | 5 |
| IFNB1     | 3456   | Interferon, beta 1, fibroblast                                  | 5 |
| IFNW1     | 3467   | Interferon, omega 1                                             | 4 |
| IHH       | 3549   | Indian hedgehog homolog (Drosophila)                            | 5 |
| IHPK2     | 51447  | Inositol hexaphosphate kinase 2                                 | 5 |
| IL18R1    | 8809   | Interleukin 18 receptor 1                                       | 4 |
| IL18RAP   | 8807   | Interleukin 18 receptor accessory protein                       | 4 |
| IRF2BP1   | 26145  | Interferon regulatory factor 2 binding protein 1                | 5 |
| IRF3      | 3661   | Interferon regulatory factor 3                                  | 5 |
| JAG1      | 182    | Jagged 1 (Alagille syndrome)                                    | 5 |
| JAG2      | 3714   | Jagged 2                                                        | 5 |
| KIAA1797  | 54914  | KIAA1797                                                        | 5 |
| KLHL23    | 151230 | Kelch-like 23 (Drosophila)                                      | 5 |
| KRAS      | 3845   | V-Ki-ras2 Kirsten rat sarcoma viral oncogene homolog            | 5 |
| KSR1      | 8844   | Kinase suppressor of ras 1                                      | 5 |
| KSR2      | 283455 | Kinase suppressor of ras 2                                      | 5 |
| LARGE     | 9215   | Like-glycosyltransferase                                        | 5 |
| LCAT      | 3931   | Lecithin-cholesterol acyltransferase                            | 5 |
| LCMT1     | 51451  | Leucine carboxyl methyltransferase 1                            | 5 |
| LOC339879 | 339879 | Similar to beta-1,4-mannosyltransferase                         | 5 |

|           |        |                                                                             |   |
|-----------|--------|-----------------------------------------------------------------------------|---|
| LOC343705 | 343705 | similar to beta-galactoside al                                              | 5 |
| LOC390377 | 390377 | similar to Alpha-N-acetyl-neur                                              | 4 |
| LOC391491 | 391491 | Similar to Guanidinoacetate N-methyltransferase                             | 4 |
| LOC391747 | 391747 | similar to Transcription initi                                              | 4 |
| LOC391761 | 391761 | similar to Transcription initi                                              | 4 |
| LOC391763 | 391763 | similar to Transcription initi                                              | 5 |
| LOC494115 | 494115 | similar to RNA binding motif p                                              | 5 |
| LOC51136  | 51136  | PTD016 protein                                                              | 5 |
| LRMP      | 4033   | Lymphoid-restricted membrane protein                                        | 5 |
| LRP5      | 4041   | Low density lipoprotein receptor-related protein 5                          | 5 |
| LRP6      | 4040   | Low density lipoprotein receptor-related protein 6                          | 5 |
| LRRK1     | 79705  | Leucine-rich repeat kinase 1                                                | 5 |
| LRRN5     | 10446  | leucine rich repeat neuronal 5                                              | 5 |
| LYK5      | 92335  | Protein kinase LYK5                                                         | 5 |
| MAMDC1    | 161357 | MAM domain containing 1                                                     | 5 |
| MAMDC2    | 256691 | MAM domain containing 2                                                     | 5 |
| MAP2K2    | 5605   | Mitogen-activated protein kinase kinase 2                                   | 4 |
| MAP3K1    | 4214   | Mitogen-activated protein kinase kinase kinase 1                            | 5 |
| MAP3K13   | 9175   | Mitogen-activated protein kinase kinase kinase 13                           | 5 |
| MAPK12    | 6300   | Mitogen-activated protein kinase 12                                         | 5 |
| MAPK3     | 5595   | Mitogen-activated protein kinase 3                                          | 3 |
| MAPKAPK3  | 7867   | Mitogen-activated protein kinase-activated protein kinase 3                 | 5 |
| MBOAT1    | 154141 | Membrane bound O-acyltransferase domain containing 1                        | 5 |
| MBOAT2    | 129642 | Membrane bound O-acyltransferase domain containing 2                        | 3 |
| MCTP2     | 55784  | Multiple C2 domains, transmembrane 2                                        | 5 |
| MEFV      | 4210   | Mediterranean fever                                                         | 5 |
| METTL3    | 56339  | Methyltransferase like 3                                                    | 5 |
| METTL4    | 64863  | Methyltransferase like 4                                                    | 5 |
| MGAT1     | 4245   | Mannosyl (alpha-1,3-)-glycoprotein beta-1,2-N-acetylglucosaminyltransferase | 5 |
| MGC11332  | 84804  | hypothetical protein MGC11332                                               | 4 |
| MGC16169  | 93627  | Hypothetical protein MGC16169                                               | 5 |
| MGC42105  | 167359 | Hypothetical protein MGC42105                                               | 3 |
| MGRN1     | 23295  | Mahogunin, ring finger 1                                                    | 5 |
| MID2      | 11043  | Midline 2                                                                   | 4 |
| MINK1     | 50488  | Misshapen-like kinase 1 (zebrafish)                                         | 3 |
| MKNK1     | 8569   | MAP kinase interacting serine/threonine kinase 1                            | 4 |
| MKNK2     | 2872   | MAP kinase interacting serine/threonine kinase 2                            | 5 |
| MKRN1     | 23608  | Makorin, ring finger protein, 1                                             | 5 |

|        |        |                                                                                          |   |
|--------|--------|------------------------------------------------------------------------------------------|---|
| MKRN3  | 7681   | Makorin, ring finger protein, 3                                                          | 5 |
| MKRN4  | 7682   | makorin, ring finger protein,                                                            | 4 |
| MLL    | 4297   | Myeloid/lymphoid or mixed-lineage leukemia (trithorax homolog, Drosophila)               | 4 |
| MLL4   | 9757   | Myeloid/lymphoid or mixed-lineage leukemia 4                                             | 5 |
| MLLT3  | 4300   | Myeloid/lymphoid or mixed-lineage leukemia (trithorax homolog, Drosophila); translocated | 5 |
| MOGAT1 | 116255 | Monoacylglycerol O-acyltransferase 1                                                     | 5 |
| MPP1   | 4354   | Membrane protein, palmitoylated 1, 55kDa                                                 | 5 |
| MPP2   | 4355   | Membrane protein, palmitoylated 2 (MAGUK p55 subfamily member 2)                         | 5 |
| MPP3   | 4356   | Membrane protein, palmitoylated 3 (MAGUK p55 subfamily member 3)                         | 5 |
| MTFMT  | 123263 | Mitochondrial methionyl-tRNA formyltransferase                                           | 5 |
| MTMR6  | 9107   | Myotubularin related protein 6                                                           | 4 |
| MYCBP2 | 23077  | MYC binding protein 2                                                                    | 4 |
| MYD88  | 4615   | Myeloid differentiation primary response gene (88)                                       | 4 |
| MYLIP  | 29116  | Myosin regulatory light chain interacting protein                                        | 5 |
| MYO9B  | 4650   | Myosin IXB                                                                               | 5 |
| MYST1  | 84148  | MYST histone acetyltransferase 1                                                         | 4 |
| NAT1   | 9      | N-acetyltransferase 1 (arylamine N-acetyltransferase)                                    | 5 |
| NAT2   | 10     | N-acetyltransferase 2 (arylamine N-acetyltransferase)                                    | 4 |
| NDUFS7 | 374291 | NADH dehydrogenase (ubiquinone) Fe-S protein 7, 20kDa (NADH-coenzyme Q reductase)        | 5 |
| NEK8   | 284086 | NIMA (never in mitosis gene a)- related kinase 8                                         | 5 |
| NME5   | 8382   | Non-metastatic cells 5, protein expressed in (nucleoside-diphosphate kinase)             | 5 |
| NNMT   | 4837   | Nicotinamide N-methyltransferase                                                         | 5 |
| NR0B2  | 8431   | Nuclear receptor subfamily 0, group B, member 2                                          | 5 |
| NR2F6  | 2063   | Nuclear receptor subfamily 2, group F, member 6                                          | 5 |
| NRAS   | 4893   | Neuroblastoma RAS viral (v-ras) oncogene homolog                                         | 5 |
| OAT    | 4942   | Ornithine aminotransferase (gyrate atrophy)                                              | 5 |
| OATL1  | 4943   | ornithine aminotransferase-lik                                                           | 5 |
| OGT    | 8473   | O-linked N-acetylglucosamine (GlcNAc) transferase (UDP-N-acetylglucosamine:polypeptide)  | 5 |
| OTC    | 5009   | Ornithine carbamoyltransferase                                                           | 5 |
| OTOF   | 9381   | Otoferlin                                                                                | 5 |
| PAK7   | 57144  | P21(CDKN1A)-activated kinase 7                                                           | 5 |
| PASK   | 23178  | PAS domain containing serine/threonine kinase                                            | 4 |
| PCGF3  | 10336  | Polycomb group ring finger 3                                                             | 5 |
| PCTK2  | 5128   | PCTAIRE protein kinase 2                                                                 | 5 |
| PDHX   | 8050   | Pyruvate dehydrogenase complex, component X                                              | 5 |
| PDK1   | 5163   | Pyruvate dehydrogenase kinase, isozyme 1                                                 | 4 |
| PDK4   | 5166   | Pyruvate dehydrogenase kinase, isozyme 4                                                 | 5 |
| PEX12  | 5193   | Peroxisomal biogenesis factor 12                                                         | 5 |

|          |        |                                                                                            |   |
|----------|--------|--------------------------------------------------------------------------------------------|---|
| PGK1     | 5230   | Phosphoglycerate kinase 1                                                                  | 5 |
| PHKA1    | 5255   | Phosphorylase kinase, alpha 1 (muscle)                                                     | 5 |
| PHKA2    | 5256   | Phosphorylase kinase, alpha 2 (liver)                                                      | 4 |
| PHKB     | 5257   | Phosphorylase kinase, beta                                                                 | 5 |
| PHKG1    | 5260   | Phosphorylase kinase, gamma 1 (muscle)                                                     | 5 |
| PHOSPHO1 | 162466 | Phosphatase, orphan 1                                                                      | 4 |
| PIGZ     | 80235  | Phosphatidylinositol glycan anchor biosynthesis, class Z                                   | 4 |
| PIK3AP1  | 118788 | Phosphoinositide-3-kinase adaptor protein 1                                                | 5 |
| PIK3CD   | 5293   | Phosphoinositide-3-kinase, catalytic, delta polypeptide                                    | 5 |
| PIK3CG   | 5294   | Phosphoinositide-3-kinase, catalytic, gamma polypeptide                                    | 5 |
| PIK3R1   | 5295   | Phosphoinositide-3-kinase, regulatory subunit 1 (p85 alpha)                                | 5 |
| PIK3R3   | 8503   | Phosphoinositide-3-kinase, regulatory subunit 3 (p55, gamma)                               | 5 |
| PIK3R5   | 23533  | Phosphoinositide-3-kinase, regulatory subunit 5, p101                                      | 5 |
| PINK1    | 65018  | PTEN induced putative kinase 1                                                             | 5 |
| PKMYT1   | 9088   | Protein kinase, membrane associated tyrosine/threonine 1                                   | 3 |
| PKN2     | 5586   | Protein kinase N2                                                                          | 5 |
| PLA2G4B  | 8681   | Phospholipase A2, group IVB (cytosolic)                                                    | 5 |
| PLCB1    | 23236  | Phospholipase C, beta 1 (phosphoinositide-specific)                                        | 4 |
| PLCB4    | 5332   | Phospholipase C, beta 4                                                                    | 5 |
| PLCD4    | 84812  | Phospholipase C, delta 4                                                                   | 5 |
| PLCG1    | 5335   | Phospholipase C, gamma 1                                                                   | 4 |
| PLEKHA5  | 54477  | Pleckstrin homology domain containing, family A member 5                                   | 5 |
| PLK1     | 5347   | Polo-like kinase 1 (Drosophila)                                                            | 4 |
| PMVK     | 10654  | Phosphomevalonate kinase                                                                   | 4 |
| POFUT1   | 23509  | Protein O-fucosyltransferase 1                                                             | 5 |
| POMGNT1  | 55624  | Protein O-linked mannose beta1,2-N-acetylglucosaminyltransferase                           | 5 |
| POU3F3   | 5455   | POU class 3 homeobox 3                                                                     | 3 |
| PPP1R12B | 4660   | Protein phosphatase 1, regulatory (inhibitor) subunit 12B                                  | 5 |
| PPP1R14A | 94274  | Protein phosphatase 1, regulatory (inhibitor) subunit 14A                                  | 5 |
| PPP1R16B | 26051  | Protein phosphatase 1, regulatory (inhibitor) subunit 16B                                  | 5 |
| PPP1R2   | 5504   | Protein phosphatase 1, regulatory (inhibitor) subunit 2                                    | 5 |
| PPP1R3A  | 5506   | Protein phosphatase 1, regulatory (inhibitor) subunit 3A (glycogen and sarcoplasmic reticu | 5 |
| PPP1R3D  | 5509   | Protein phosphatase 1, regulatory (inhibitor) subunit 3D                                   | 5 |
| PPP2R2C  | 5522   | Protein phosphatase 2 (formerly 2A), regulatory subunit B, gamma isoform                   | 5 |
| PPP2R3A  | 5523   | Protein phosphatase 2 (formerly 2A), regulatory subunit B", alpha                          | 5 |
| PPP2R3B  | 28227  | Protein phosphatase 2 (formerly 2A), regulatory subunit B", beta                           | 4 |
| PPP3CC   | 5533   | Protein phosphatase 3 (formerly 2B), catalytic subunit, gamma isoform                      | 5 |
| PPP3R2   | 5535   | Protein phosphatase 3 (formerly 2B), regulatory subunit B, beta isoform                    | 5 |

|         |        |                                                                                       |   |
|---------|--------|---------------------------------------------------------------------------------------|---|
| PPP4R2  | 151987 | Protein phosphatase 4, regulatory subunit 2                                           | 5 |
| PRKCH   | 5583   | Protein kinase C, eta                                                                 | 5 |
| PRKDC   | 5591   | Protein kinase, DNA-activated, catalytic polypeptide                                  | 5 |
| PRMT7   | 54496  | protein arginine N-methyltrans                                                        | 5 |
| PRMT8   | 56341  | Protein arginine methyltransferase 8                                                  | 5 |
| PRTFDC1 | 56952  | Phosphoribosyl transferase domain containing 1                                        | 5 |
| PSAT1   | 29968  | Phosphoserine aminotransferase 1                                                      | 5 |
| PSMD14  | 10213  | Proteasome (prosome, macropain) 26S subunit, non-ATPase, 14                           | 3 |
| PTCH2   | 8643   | Patched homolog 2 (Drosophila)                                                        | 5 |
| PTK7    | 5754   | PTK7 protein tyrosine kinase 7                                                        | 5 |
| PTPN14  | 5784   | Protein tyrosine phosphatase, non-receptor type 14                                    | 5 |
| PTPN6   | 5777   | Protein tyrosine phosphatase, non-receptor type 6                                     | 4 |
| QPRT    | 23475  | Quinolate phosphoribosyltransferase (nicotinate-nucleotide pyrophosphorylase (carboxy | 5 |
| QTRT1   | 81890  | Queuine tRNA-ribosyltransferase 1 (tRNA-guanine transglycosylase)                     | 4 |
| QTRTD1  | 79691  | Queuine tRNA-ribosyltransferase domain containing 1                                   | 5 |
| RAB7    | 7879   | RAB7, member RAS oncogene fami                                                        | 5 |
| RAD23A  | 5886   | RAD23 homolog A (S. cerevisiae)                                                       | 5 |
| RDH16   | 8608   | Retinol dehydrogenase 16 (all-trans)                                                  | 4 |
| RFPL1   | 5988   | Ret finger protein-like 1                                                             | 5 |
| RFPL2   | 10739  | Ret finger protein-like 2                                                             | 5 |
| RFPL3   | 10738  | Ret finger protein-like 3                                                             | 5 |
| RFWD3   | 55159  | Ring finger and WD repeat domain 3                                                    | 5 |
| RG9MTD2 | 93587  | RNA (guanine-9-) methyltransferase domain containing 2                                | 4 |
| RG9MTD3 | 158234 | RNA (guanine-9-) methyltransferase domain containing 3                                | 4 |
| RIC8B   | 55188  | Resistance to inhibitors of cholinesterase 8 homolog B (C. elegans)                   | 4 |
| RIMS4   | 140730 | Regulating synaptic membrane exocytosis 4                                             | 5 |
| RIPK4   | 54101  | Receptor-interacting serine-threonine kinase 4                                        | 5 |
| RMND5A  | 64795  | Required for meiotic nuclear division 5 homolog A (S. cerevisiae)                     | 5 |
| RMND5B  | 64777  | Required for meiotic nuclear division 5 homolog B (S. cerevisiae)                     | 4 |
| RNF10   | 9921   | Ring finger protein 10                                                                | 5 |
| RNF113A | 7737   | Ring finger protein 113A                                                              | 5 |
| RNF123  | 63891  | Ring finger protein 123                                                               | 5 |
| RNF138  | 51444  | Ring finger protein 138                                                               | 5 |
| RNF139  | 11236  | Ring finger protein 139                                                               | 5 |
| RNF2    | 6045   | Ring finger protein 2                                                                 | 5 |
| RNF20   | 56254  | Ring finger protein 20                                                                | 5 |
| RNF26   | 79102  | Ring finger protein 26                                                                | 4 |
| RNF34   | 80196  | Ring finger protein 34                                                                | 5 |

|            |        |                                                                                         |   |
|------------|--------|-----------------------------------------------------------------------------------------|---|
| RNF41      | 10193  | Ring finger protein 41                                                                  | 5 |
| RNF6       | 6049   | Ring finger protein (C3H2C3 type) 6                                                     | 5 |
| RNMTL1     | 55178  | RNA methyltransferase like 1                                                            | 5 |
| RORC       | 6097   | RAR-related orphan receptor C                                                           | 5 |
| RPS6KL1    | 83694  | Ribosomal protein S6 kinase-like 1                                                      | 5 |
| RSAD1      | 55316  | Radical S-adenosyl methionine domain containing 1                                       | 5 |
| SAT1       | 6303   | Spermidine/spermine N1-acetyltransferase 1                                              | 5 |
| SAT2       | 112483 | Spermidine/spermine N1-acetyltransferase 2                                              | 5 |
| SBF1       | 6305   | SET binding factor 1                                                                    | 3 |
| SCYL1      | 57410  | SCY1-like 1 (S. cerevisiae)                                                             | 5 |
| SCYL2      | 55681  | SCY1-like 2 (S. cerevisiae)                                                             | 5 |
| SERGEF     | 26297  | Secretion regulating guanine nucleotide exchange factor                                 | 5 |
| SHH        | 6469   | Sonic hedgehog homolog (Drosophila)                                                     | 5 |
| SHMT1      | 6470   | Serine hydroxymethyltransferase 1 (soluble)                                             | 5 |
| SHMT2      | 6472   | Serine hydroxymethyltransferase 2 (mitochondrial)                                       | 4 |
| SIP1       | 8487   | Survival of motor neuron protein interacting protein 1                                  | 5 |
| SLC9A2     | 6549   | Solute carrier family 9 (sodium/hydrogen exchanger), member 2                           | 5 |
| SNAI3      | 333929 | Snail homolog 3 (Drosophila)                                                            | 5 |
| SOD2       | 6648   | Superoxide dismutase 2, mitochondrial                                                   | 5 |
| SPTLC1     | 10558  | Serine palmitoyltransferase, long chain base subunit 1                                  | 5 |
| SPTLC2     | 9517   | Serine palmitoyltransferase, long chain base subunit 2                                  | 5 |
| SRPK2      | 6733   | SFRS protein kinase 2                                                                   | 5 |
| SRPK3      | 26576  | SFRS protein kinase 3                                                                   | 3 |
| SSH2       | 85464  | Slingshot homolog 2 (Drosophila)                                                        | 5 |
| ST6GAL2    | 84620  | ST6 beta-galactosamide alpha-2,6-sialyltransferase 2                                    | 5 |
| ST6GALNAC5 | 81849  | ST6 (alpha-N-acetyl-neuraminyl-2,3-beta-galactosyl-1,3)-N-acetylgalactosaminide alpha-2 | 5 |
| ST8SIA2    | 8128   | ST8 alpha-N-acetyl-neuraminide alpha-2,8-sialyltransferase 2                            | 5 |
| ST8SIA4    | 7903   | ST8 alpha-N-acetyl-neuraminide alpha-2,8-sialyltransferase 4                            | 5 |
| ST8SIA5    | 29906  | ST8 alpha-N-acetyl-neuraminide alpha-2,8-sialyltransferase 5                            | 5 |
| ST8SIA6    | 338596 | ST8 alpha-N-acetyl-neuraminide alpha-2,8-sialyltransferase 6                            | 5 |
| STK25      | 10494  | Serine/threonine kinase 25 (STE20 homolog, yeast)                                       | 5 |
| STK32A     | 202374 | Serine/threonine kinase 32A                                                             | 5 |
| STK32C     | 282974 | Serine/threonine kinase 32C                                                             | 4 |
| STK36      | 27148  | Serine/threonine kinase 36, fused homolog (Drosophila)                                  | 5 |
| STYX       | 6815   | Serine/threonine/tyrosine interacting protein                                           | 5 |
| SULT1A1    | 6817   | Sulfotransferase family, cytosolic, 1A, phenol-preferring, member 1                     | 5 |
| SULT1A2    | 6799   | Sulfotransferase family, cytosolic, 1A, phenol-preferring, member 2                     | 4 |
| SULT1A3    | 6818   | Sulfotransferase family, cytosolic, 1A, phenol-preferring, member 3                     | 4 |



|           |       |                                                                                  |   |
|-----------|-------|----------------------------------------------------------------------------------|---|
| SULT1B1   | 27284 | Sulfotransferase family, cytosolic, 1B, member 1                                 | 5 |
| SULT1C1   | 6819  | sulfotransferase family, cytos                                                   | 5 |
| SULT1C2   | 27233 | Sulfotransferase family, cytosolic, 1C, member 2                                 | 5 |
| SULT4A1   | 25830 | Sulfotransferase family 4A, member 1                                             | 5 |
| SUV39H2   | 79723 | Suppressor of variegation 3-9 homolog 2 (Drosophila)                             | 4 |
| TAF1      | 6872  | TAF1 RNA polymerase II, TATA box binding protein (TBP)-associated factor, 250kDa | 5 |
| TASP1     | 55617 | Taspase, threonine aspartase, 1                                                  | 5 |
| TAT       | 6898  | Tyrosine aminotransferase                                                        | 5 |
| TFF1      | 7031  | Trefoil factor 1                                                                 | 2 |
| TFF2      | 7032  | Trefoil factor 2 (spasmolytic protein 1)                                         | 5 |
| TFF3      | 7033  | Trefoil factor 3 (intestinal)                                                    | 4 |
| TGFB2     | 7042  | Transforming growth factor, beta 2                                               | 5 |
| TGFBR3    | 7049  | Transforming growth factor, beta receptor III                                    | 5 |
| TGFBRAP1  | 9392  | Transforming growth factor, beta receptor associated protein 1                   | 5 |
| TJP2      | 9414  | Tight junction protein 2 (zona occludens 2)                                      | 5 |
| TLK1      | 9874  | Tousled-like kinase 1                                                            | 5 |
| TNFRSF10A | 8797  | Tumor necrosis factor receptor superfamily, member 10a                           | 5 |
| TNFRSF10B | 8795  | Tumor necrosis factor receptor superfamily, member 10b                           | 5 |
| TNFSF10   | 8743  | Tumor necrosis factor (ligand) superfamily, member 10                            | 5 |
| TRADD     | 8717  | TNFRSF1A-associated via death domain                                             | 4 |
| TRAIP     | 10293 | TRAF interacting protein                                                         | 5 |
| TRIB2     | 28951 | Tribbles homolog 2 (Drosophila)                                                  | 5 |
| TRIM11    | 81559 | Tripartite motif-containing 11                                                   | 5 |
| TRIM13    | 10206 | Tripartite motif-containing 13                                                   | 5 |
| TRIM17    | 51127 | Tripartite motif-containing 17                                                   | 5 |
| TRIM22    | 10346 | Tripartite motif-containing 22                                                   | 3 |
| TRIM27    | 5987  | Tripartite motif-containing 27                                                   | 4 |
| TRIM3     | 10612 | Tripartite motif-containing 3                                                    | 5 |
| TRIM31    | 11074 | Tripartite motif-containing 31                                                   | 5 |
| TRIM35    | 23087 | Tripartite motif-containing 35                                                   | 4 |
| TRIM39    | 56658 | Tripartite motif-containing 39                                                   | 5 |
| TRIM44    | 54765 | Tripartite motif-containing 44                                                   | 5 |
| TRIM46    | 80128 | Tripartite motif-containing 46                                                   | 5 |
| TRIM48    | 79097 | Tripartite motif-containing 48                                                   | 5 |
| TRIM49    | 57093 | Tripartite motif-containing 49                                                   | 5 |
| TRIM54    | 57159 | Tripartite motif-containing 54                                                   | 5 |
| TRIM58    | 25893 | Tripartite motif-containing 58                                                   | 5 |
| TRIM62    | 55223 | Tripartite motif-containing 62                                                   | 5 |

|         |       |                                                                                         |   |
|---------|-------|-----------------------------------------------------------------------------------------|---|
| TRIM68  | 55128 | Tripartite motif-containing 68                                                          | 5 |
| TRIM7   | 81786 | Tripartite motif-containing 7                                                           | 5 |
| TRIM8   | 81603 | Tripartite motif-containing 8                                                           | 5 |
| TSPAN17 | 26262 | Tetraspanin 17                                                                          | 5 |
| UBADC1  | 10422 | ubiquitin associated domain co                                                          | 5 |
| UBE1DC1 | 79876 | ubiquitin-activating enzyme E1                                                          | 4 |
| UBE2V1  | 7335  | Ubiquitin-conjugating enzyme E2 variant 1                                               | 5 |
| UGT1A6  | 54578 | UDP glucuronosyltransferase 1 family, polypeptide A6                                    | 5 |
| UGT2B28 | 54490 | UDP glucuronosyltransferase 2 family, polypeptide B28                                   | 5 |
| UMPS    | 7372  | Uridine monophosphate synthetase (orotate phosphoribosyl transferase and orotidine-5'-d | 4 |
| VPS41   | 27072 | Vacuolar protein sorting 41 homolog ( <i>S. cerevisiae</i> )                            | 4 |
| WBSCR16 | 81554 | Williams-Beuren syndrome chromosome region 16                                           | 5 |
| WIF1    | 11197 | WNT inhibitory factor 1                                                                 | 5 |
| WISP1   | 8840  | WNT1 inducible signaling pathway protein 1                                              | 4 |
| WISP2   | 8839  | WNT1 inducible signaling pathway protein 2                                              | 5 |
| WISP3   | 8838  | WNT1 inducible signaling pathway protein 3                                              | 5 |
| WNK4    | 65266 | WNK lysine deficient protein kinase 4                                                   | 5 |
| WNT2    | 7472  | Wingless-type MMTV integration site family member 2                                     | 5 |
| WNT2B   | 7482  | Wingless-type MMTV integration site family, member 2B                                   | 5 |
| WNT3    | 7473  | Wingless-type MMTV integration site family, member 3                                    | 5 |
| WWOX    | 51741 | WW domain containing oxidoreductase                                                     | 5 |
| XYLT1   | 64131 | Xylosyltransferase I                                                                    | 4 |
| XYLT2   | 64132 | Xylosyltransferase II                                                                   | 5 |
| ZCCHC14 | 23174 | Zinc finger, CCHC domain containing 14                                                  | 5 |
| ZFPL1   | 7542  | Zinc finger protein-like 1                                                              | 5 |
| ZNF179  | 7732  | Zinc finger protein 179                                                                 | 5 |
| ZNF294  | 26046 | Zinc finger protein 294                                                                 | 5 |

## Supplementary Table 2

### shRNA Target Sequences

| shRNA description |     | Target Sequence              |
|-------------------|-----|------------------------------|
| GFP               | #1: | GTCGAGCTGGACGGCGACGTA        |
|                   | #2: | ACAACAGCCACAACGTCTATA        |
|                   | #3: | GGCCCGCAAGCTGACCCTGAAGTTCAT  |
| Nek4              | #1: | GATTACTGTTTACTGAGCCTT        |
|                   | #2: | <b>CCAGCTCTTGTCTCAGTTGAA</b> |
| GNL3              | #1: | GCTAAACTGTTCTCTGTATAA        |
|                   | #2: | CCTGATATTAAGCCATCAAAT        |
| Nat10             | #1: | CCACAGGAAATTCACACCGTA        |
|                   | #2: | GCAATTGTACACAGTGACTAT        |
| MCM7              | #1: | GCGCAGATTTGAGCTGTATTT        |
|                   | #2: | GCTAGTAAGGATGCCACCTAT        |
| PCNA              | #1: | CACGTATATGCCGAGATCTCA        |
|                   | #2: | TGAAGCACCAAACCAGGAGAA        |
| GNL3L             | #1: | GCCAATCGAGAGGCTGAATTA        |
|                   | #2: | CCAAACCCAATACCCTCTATT        |
| RAB3B             | #1: | GAGTCCTTCAATGCTGTCCAA        |
|                   | #2: | <b>AGTGCAAAGGAGAACATCAGT</b> |
|                   | #3: | AGAGTCCTTCAATGCTGTCCA        |
|                   | #4: | GCTACTCAGATCAAGACCTAC        |
| WDR79             | #1: | <b>TGCCTCGATTTCTCAGTGGTT</b> |
|                   | #2: | CACCAATCAGCGCATCTACTT        |
|                   | #3: | CACCCAACCTGAGAACTTCTT        |
| PRKACB            | #1: | <b>AGGAGTGCTAATCTATGAAAT</b> |
|                   | #2: | GCCAACTGACTTAACAACATT        |
|                   | #3: | ACTCAGAATAATGCCGGACTT        |
|                   | #4: | CACGACAGATTGGATTGCTAT        |
| FBXW7             | #1: | <b>CCTAAAGAGTTGGCACTCTAT</b> |
|                   | #2: | CCAGAGACTGAAACCTGTCTA        |
| ZNF193            | #1: | CCTTTCTCCATGAAATGTGTT        |
|                   | #2: | CGGCGTTCATTTCTCATTGAA        |
|                   | #3: | CCTAAGATAGTGGAACCAT          |
|                   | #4: | <b>CCACAATATACAGAAACGGTA</b> |
|                   | #5: | ACAGACAAGAAGTCCTCTGTA        |
| RUNX3             | #1: | CCCAGCACTTTGTAGTCTCAT        |
|                   | #2: | <b>CCAAGGCACCTCGGAACTGAA</b> |
|                   | #3: | CGAGA ACTACTCCGCTGAGCT       |
| EHBP1             | #1: | CCAGTTTACAAAGACAGTCTT        |
|                   | #2: | GCCTTAATAAGGAGAATGAAT        |
|                   | #3: | <b>CCAGATAAACTGGTGGTAGTT</b> |

|         |     |                              |
|---------|-----|------------------------------|
|         | #4: | CCGAAGAAGAAGATGAGCATT        |
| CHEK2   | #1: | CGCCGTCCTTTGAATAACAAT        |
|         | #2: | GCCAATCTTGAATGTGTGAAT        |
|         | #3: | GCTCTCAATGTTGAAACAGAA        |
|         | #4: | <b>TACATAGAAGATCACAGTGGC</b> |
|         | #5: | TGTAAGAAAGTAGCCATAAAG        |
|         | #6: | AGCTAAATCATCCTTGCATCA        |
| TCF20:  | #1: | CGTGATTCTTTATGTTGTGTT        |
|         | #2: | GCCACAGAAATGCAGAGCAAA        |
|         | #3: | <b>CGCTTGATGATATACTGTCTT</b> |
|         | #4: | GCTAGTTTCAACAACAAGAAA        |
|         | #5: | GCACAGGCTTATGGAACACAA        |
| CDC2:   |     | <b>TCCAGGTTATATCTCATCTTT</b> |
| CSNK1E: |     | <b>CCAGTGTTTGCTTAGTGTCTT</b> |
| MCTP1:  |     | <b>CAGAAGTACATTGAAGAGGAA</b> |
| SNF1LK: |     | <b>CCATTTATTACCTCCTCCTTG</b> |
| CHRM3:  |     | <b>CCTGGTAATTGTGTCATTTAA</b> |
| KLF11:  |     | <b>CGCAGTTGACATCATGGACAT</b> |
| RAB14:  |     | <b>AGGAGCGATTTAGGGCTGTTA</b> |

Those shRNAs indicated in bold face were identified in the screen as increasing the time to replicative senescence (Table 1).
